# Supplementary material for: Brain-wide analysis of the supraspinal connectome reveals anatomical correlates to functional recovery after spinal injury
Source: eLife. 2022 Jul 15;11:e76254. doi: 10.7554/eLife.76254 (PMC9345604; doi:10.7554/eLife.76254)
Supplement: Source data 1. [file elife-76254-data1.xlsx]

## Sheet: Key - labels
Individual Region - ID	Individual Region - Name	Individual Region - Shortened name	Abbreviation	Summary ID	Summary Region - Name
1	Dorsal motor nucleus of the vagus nerve	Dorsal Mot. Nuc. Vagus	DMX	1	Solitariospinal Area
2	Cuneate nucleus	Cuneate nucleus	CU	1	Solitariospinal Area
3	Gracile nucleus	Gracile nucleus	GR	1	Solitariospinal Area
4	Nucleus of the solitary tract	Nuc. Solitary Tract	NST	1	Solitariospinal Area
5	Medulla	Medulla	MY	1	Solitariospinal Area
6	Medullary reticular nucleus, ventral part	Medullary Ret. Nuc., ventral	MDRNd	2	Medullary Reticular Nuclei
7	Medullary reticular nucleus, dorsal part	Medullary Ret. Nuc., dorsal	MDRNv	2	Medullary Reticular Nuclei
8	Magnocellular reticular nucleus	Magnocellular Ret. Nuc.	MARN	3	Magnocellular Ret. Nuc.
9	Gigantocellular reticular nucleus	Gigantocellular Ret. Nuc.	GRN	4	Gigantocellular reticular nucleus
10	Lateral reticular nucleus, magnocellular part	Lat. Ret. Nuc., magnocellular	LRNm	5	Lateral Reticular Nuclei
11	Paragigantocellular reticular nucleus, lateral part	Paragiganto. Ret. Nuc, lateral	PGRNl	5	Lateral Reticular Nuclei
12	Intermediate reticular nucleus	Intermediate Ret. Nuc	IRN	5	Lateral Reticular Nuclei
13	Parvicellular reticular nucleus	Parvicellular Ret. Nuc.	PARN	5	Lateral Reticular Nuclei
14	Paragigantocellular reticular nucleus, dorsal part	Paragigant. Ret. Nuc., dorsal	PGRNd	6	Dorsal Reticular Nucleus
15	Nucleus raphe magnus	Nucleus raphe magnus	RM	7	Raphe Nuclei
16	Nucleus raphe obscurus	Nucleus raphe obscurus	RO	7	Raphe Nuclei
17	Facial motor nucleus	Facial motor nucleus	VII	30	Unused
18	Hypoglossal nucleus	Hypoglossal nucleus	XII	8	Perihypoglossal Area
19	Nucleus of Roller	Nucleus of Roller	NR	8	Perihypoglossal Area
20	Nucleus prepositus	Nucleus prepositus	PRP	8	Perihypoglossal Area
21	Spinal nucleus of the trigeminal, interpolar part	Spinal Nuc. Trig., interpolar	SPVI	9	Medullary Trigeminal Area
22	Spinal nucleus of the trigeminal, caudal part	Spinal Nuc. Trig., caudal	SPVC	9	Medullary Trigeminal Area
23	Spinal vestibular nucleus	Spinal vestibular nucleus	SPIV	10	Vestibular Nuclei
24	Medial vestibular nucleus	Medial vestibular nucleus	MV	10	Vestibular Nuclei
25	Lateral vestibular nucleus	Lateral vestibular nucleus	LAV	10	Vestibular Nuclei
26	Pontine reticular nucleus, caudal part	Pontine Ret. Nuc., caudal	PRNc	11	Pontine Reticular Nuclei
27	Pontine reticular nucleus	Pontine reticular nucleus	PRNr	11	Pontine Reticular Nuclei
28	Superior olivary complex, lateral part	Sup. olivary complex, lateral	SOCl	12	Superior Olivary Complex
29	Superior olivary complex, medial part	Sup. olivary complex, medial	SOCm	12	Superior Olivary Complex
30	Superior olivary complex, periolivary region	Sup. olivary, periolivary	POR	12	Superior Olivary Complex
31	Peritrigeminal zone	Peritrigeminal zone	P5	13	Pontine Trigeminal Area
32	Supratrigeminal nucleus	Supratrigeminal nucleus	SUT	13	Pontine Trigeminal Area
33	Pontine central gray	Pontine central gray	PGC	14	Pontine Central Gray Area
34	Sublaterodorsal nucleus	Sublaterodorsal nucleus	SLD	14	Pontine Central Gray Area
35	Laterodorsal tegmental nucleus	Laterodorsal tegmental Nuc.	LDT	14	Pontine Central Gray Area
36	Subceruleus nucleus	Subceruleus nucleus	SLC	14	Pontine Central Gray Area
37	Barrington's nucleus	Barrington's nucleus	B	14	Pontine Central Gray Area
38	Pons	Pons	P	14	Pontine Central Gray Area
39	Locus ceruleus	Locus ceruleus	LC	30	Unused
40	Parabrachial nucleus	Parabrachial nucleus	PB	15	Parabrachial / Pedunculopontine
41	Pedunculopontine nucleus	Pedunculopontine nucleus	PPN	15	Parabrachial / Pedunculopontine
42	Fastigial nucleus	Fastigial nucleus	FN	16	Cerebellospinal Nuclei
43	Interposed nucleus	Interposed nucleus	IP	16	Cerebellospinal Nuclei
44	Red nucleus	Red nucleus	RN	17	Red Nucleus
45	Edinger-Westphal nucleus	Edinger-Westphal nucleus	EW	18	Midbrain Midline Nuclei
46	Interstitial nucleus of Cajal	Interstitial nucleus of Cajal	INC	18	Midbrain Midline Nuclei
47	Nucleus of Darkschewitsch	Nucleus of Darkschewitsch	ND	18	Midbrain Midline Nuclei
48	Midbrain	Midbrain	MB	18	Midbrain Midline Nuclei
49	Midbrain reticular nucleus	Midbrain reticular nucleus	MRN	19	Midbrain Reticular Nuclei
50	Midbrain reticular nucleus, retrorubral area	Midbrn Ret. Nuc., retrorubral	RR	19	Midbrain Reticular Nuclei
51	Periaqueductal gray	Periaqueductal gray	PAG	20	Periaqueductal Gray
52	Paraventricular hypothalamic nucleus	Paraventricular Hyp. Nuc.	PVH	21	Hypothalamic Periventricular Zone
53	Paraventricular hypothalamic nucleus, descending division	Paraventric. Hyp., descend	PVHd	21	Hypothalamic Periventricular Zone
54	Periventricular hypothalamic nucleus, intermediate part	Periventric. Hyp., interm.	Pvi	21	Hypothalamic Periventricular Zone
55	Dorsomedial nucleus of the hypothalamus	Dorsomedial Nuc. Hypothal.	DMH	22	Hypothalamic Lateral Area
56	Hypothalamus	Hypothalamus	HY	22	Hypothalamic Lateral Area
57	Lateral hypothalamic area	Lateral hypothalamic area	LHA	22	Hypothalamic Lateral Area
58	Zona incerta	Zona incerta	ZI	22	Hypothalamic Lateral Area
59	Anterior hypothalamic nucleus	Anterior hypothal. nucleus	AHN	23	Hypothalamic Medial Area
60	Posterior hypothalamic nucleus	Posterior hypothal. nucleus	PH	23	Hypothalamic Medial Area
61	Ventromedial hypothalamic nucleus	Ventromedial Hyp. Nuc.	VMH	23	Hypothalamic Medial Area
62	Perireunensis nucleus	Perireunensis nucleus	PR	24	Thalamus
63	Subparafascicular nucleus, magnocellular part	Subparafasc. Nuc., magno.	SPFm	24	Thalamus
64	Thalamus	Thalamus	TH	24	Thalamus
65	Ventral medial nucleus of the thalamus	Ventral med.l Nuc. thalamus	VM	24	Thalamus
66	Nucleus of reuniens	Nucleus of reuniens	RE	24	Thalamus
67	Central amygdalar nucleus, medial part	Central amyg. Nuc., medial	CEAm	30	Unused
68	Substantia innominata	Substantia innominata	SI	30	Unused
69	Corticospinal	Corticospinal	CST	25	Corticospinal

## Sheet: Data - 69 regions
		L1 injected - uninjured																															L3/4 injected - uninjured																Thoracic injected - uninjured
Region ID	Region Name	159-L	159-R	159-Tot	162-L	162-R	162-Tot	166-L	166-R	166-Tot	167-L	167-R	167-Tot	168-L	168-R	168-Tot	169-L	169-R	169-Tot	170-L	170-R	170-Tot	171-L	171-R	171-Tot	141-L	141-R	141-Tot	142-L	142-R	142-Tot		135-L	135-R	135-Tot	136-L	136-R	136-Tot	137-L	137-R	137-Tot	138-L	138-R	138-Tot	139-L	139-R	139-Tot		140-L
1	Dorsal motor nucleus of the vagus nerve	352	362	714	223	203	426	234	199	433	198	148	346	6	2	8	104	40	144	217	211	428	3	4	7	5	7	12	0	0	0		257	361	618	11	165	176	12	7	19	8	20	28	1	0	1		20
2	Cuneate nucleus	0	0	0	0	0	0	0	0	0	0	0	0	31	83	114	0	0	0	0	1	1	3	50	53	32	20	52	211	144	355		0	1	1	12	1	13	318	62	380	101	245	346	49	7	56		296
3	Gracile nucleus	0	0	0	0	0	0	0	0	0	0	0	0	68	70	138	0	0	0	0	0	0	39	81	120	138	143	281	66	85	151		13	3	16	1	0	1	62	194	256	168	110	278	10	1	11		88
4	Nucleus of the solitary tract	53	96	149	83	48	131	18	35	53	30	24	54	208	179	387	18	40	58	11	29	40	149	113	262	185	121	306	60	81	141		331	216	547	93	90	183	241	163	404	220	178	398	36	11	47		152
5	Medulla	220	155	375	118	96	214	466	144	610	154	169	323	247	155	402	68	36	104	92	64	156	70	68	138	205	166	371	246	318	564		266	156	422	140	264	404	243	567	810	188	231	419	71	50	121		1077
6	Medullary reticular nucleus, ventral part	181	257	438	50	27	77	187	45	232	162	71	233	363	383	746	25	5	30	18	41	59	140	172	312	2136	710	2846	1998	1393	3391		590	71	661	623	139	762	1233	1098	2331	270	1030	1300	450	273	723		2638
7	Medullary reticular nucleus, dorsal part	194	87	281	224	87	311	139	240	379	137	307	444	415	419	834	33	52	85	39	212	251	127	266	393	997	636	1633	551	210	761		121	182	303	331	262	593	695	274	969	313	352	665	149	34	183		567
8	Magnocellular reticular nucleus	865	1002	1867	328	121	449	644	276	920	558	692	1250	626	519	1145	83	118	201	72	53	125	144	118	262	52	47	99	69	71	140		27	71	98	512	1026	1538	818	1775	2593	52	119	171	36	58	94		815
9	Gigantocellular reticular nucleus	5955	3869	9824	2745	3106	5851	5386	3385	8771	3547	4092	7639	3968	4083	8051	3528	2615	6143	4725	5040	9765	5179	5061	10240	9266	6014	15280	7105	3666	10771		6265	5509	11774	5376	4255	9631	7751	5577	13328	3696	4785	8481	3325	2228	5553		5984
10	Lateral reticular nucleus, magnocellular part	190	187	377	61	52	113	186	94	280	72	189	261	235	335	570	4	11	15	40	38	78	89	121	210	74	91	165	773	87	860		20	124	144	280	172	452	318	69	387	37	88	125	62	21	83		146
11	Paragigantocellular reticular nucleus, lateral part	774	166	940	73	122	195	672	196	868	230	264	494	292	368	660	100	57	157	71	261	332	294	160	454	170	287	457	260	20	280		13	398	411	415	358	773	900	285	1185	323	281	604	82	5	87		580
12	Intermediate reticular nucleus	588	334	922	177	225	402	291	327	618	184	207	391	354	557	911	569	498	1067	281	851	1132	178	492	670	1477	2213	3690	1051	81	1132		682	1256	1938	1402	154	1556	1222	146	1368	2197	622	2819	1763	42	1805		363
13	Parvicellular reticular nucleus	0	3	3	8	11	19	67	13	80	0	2	2	6	4	10	0	15	15	9	44	53	11	2	13	18	5	23	13	0	13		35	1	36	2	0	2	22	3	25	8	6	14	2	0	2		4
14	Paragigantocellular reticular nucleus, dorsal part	5	16	21	5	4	9	13	10	23	1	4	5	19	19	38	0	4	4	5	7	12	8	7	15	54	56	110	75	44	119		39	39	78	3	12	15	25	9	34	22	58	80	1	5	6		34
15	Nucleus raphe magnus	364	398	762	84	103	187	306	125	431	233	224	457	192	109	301	250	175	425	288	227	515	194	120	314	263	270	533	11	13	24		123	189	312	349	446	795	454	519	973	199	205	404	131	53	184		240
16	Nucleus raphe obscurus	101	107	208	27	23	50	28	43	71	30	20	50	38	38	76	29	31	60	9	3	12	39	39	78	9	6	15	64	64	128		15	13	28	41	118	159	144	141	285	28	33	61	33	70	103		139
17	Facial motor nucleus	6	11	17	1	1	2	46	16	62	10	3	13	19	15	34	0	0	0	9	25	34	13	12	25	7	17	24	24	0	24		5	10	15	10	5	15	21	0	21	11	13	24	10	1	11		99
18	Hypoglossal nucleus	45	64	109	64	48	112	112	45	157	8	30	38	15	24	39	19	30	49	57	47	104	1	8	9	18	42	60	34	7	41		49	26	75	23	21	44	124	8	132	71	20	91	11	6	17		16
19	Nucleus of Roller	0	0	0	0	3	3	3	0	3	0	0	0	1	1	2	0	0	0	0	2	2	0	0	0	41	9	50	8	0	8		20	3	23	1	0	1	7	0	7	2	6	8	0	0	0		1
20	Nucleus prepositus	6	3	9	0	0	0	0	0	0	0	0	0	0	0	0	0	0	0	1	0	1	1	0	1	0	0	0	0	0	0		0	1	1	0	0	0	0	0	0	0	10	10	0	0	0		0
21	Spinal nucleus of the trigeminal, interpolar part	0	2	2	0	0	0	0	0	0	0	4	4	0	1	1	1	0	1	3	0	3	0	2	2	0	0	0	0	6	6		31	0	31	0	7	7	0	0	0	0	0	0	0	0	0		1
22	Spinal nucleus of the trigeminal, caudal part	1	4	5	1	5	6	15	8	23	1	5	6	7	10	17	0	0	0	9	18	27	7	2	9	36	44	80	7	11	18		186	0	186	11	9	20	4	1	5	3	1	4	0	0	0		78
23	Spinal vestibular nucleus	126	52	178	33	56	89	37	87	124	33	66	99	73	105	178	26	51	77	76	111	187	36	54	90	83	39	122	52	73	125		29	94	123	100	36	136	140	154	294	84	106	190	6	13	19		117
24	Medial vestibular nucleus	22	26	48	25	16	41	21	20	41	4	21	25	44	25	69	6	0	6	34	30	64	11	17	28	24	14	38	45	30	75		36	15	51	25	24	49	91	71	162	47	28	75	4	1	5		52
25	Lateral vestibular nucleus	9	0	9	5	15	20	6	48	54	4	4	8	16	14	30	0	15	15	18	19	37	5	3	8	7	5	12	3	2	5		0	11	11	1	0	1	24	7	31	20	5	25	0	0	0		4
26	Pontine reticular nucleus, caudal part	454	628	1082	454	88	542	449	402	851	241	220	461	626	562	1188	113	132	245	389	472	861	422	464	886	353	167	520	795	417	1212		645	531	1176	477	256	733	1005	513	1518	601	467	1068	131	31	162		661
27	Pontine reticular nucleus	1216	1595	2811	801	107	908	634	1158	1792	415	620	1035	882	919	1801	232	496	728	731	892	1623	609	619	1228	540	209	749	1288	1072	2360		1011	992	2003	772	515	1287	1649	1123	2772	991	993	1984	325	72	397		1216
28	Superior olivary complex, lateral part	14	14	28	6	1	7	5	7	12	8	4	12	9	7	16	13	6	19	8	4	12	12	5	17	26	48	74	16	17	33		17	5	22	10	9	19	20	5	25	4	6	10	11	2	13		10
29	Superior olivary complex, medial part	6	2	8	6	1	7	12	0	12	1	3	4	2	3	5	0	1	1	2	1	3	3	0	3	7	0	7	3	1	4		0	6	6	9	11	20	0	0	0	6	1	7	0	0	0		0
30	Superior olivary complex, periolivary region	9	0	9	2	4	6	3	1	4	3	0	3	3	2	5	0	0	0	0	0	0	13	2	15	5	9	14	9	0	9		0	14	14	0	5	5	6	1	7	7	0	7	0	0	0		3
31	Peritrigeminal zone	4	8	12	4	0	4	6	16	22	2	2	4	16	3	19	12	0	12	11	8	19	2	4	6	4	4	8	36	0	36		26	6	32	15	3	18	38	22	60	4	0	4	5	2	7		80
32	Supratrigeminal nucleus	3	8	11	4	4	8	6	6	12	1	8	9	12	10	22	0	2	2	4	6	10	5	1	6	23	3	26	27	5	32		4	1	5	9	8	17	63	9	72	7	16	23	7	4	11		11
33	Pontine central gray	263	186	449	87	74	161	263	168	431	96	92	188	158	241	399	12	14	26	187	193	380	135	143	278	286	120	406	191	105	296		303	289	592	338	362	700	328	307	635	137	285	422	247	58	305		158
34	Sublaterodorsal nucleus	82	78	160	56	67	123	60	53	113	12	11	23	71	89	160	14	14	28	54	86	140	70	89	159	90	33	123	156	82	238		109	80	189	126	103	229	172	136	308	104	118	222	49	64	113		96
35	Laterodorsal tegmental nucleus	132	104	236	54	28	82	139	119	258	88	102	190	145	93	238	59	34	93	116	106	222	56	61	117	133	105	238	115	64	179		120	145	265	144	153	297	196	186	382	109	138	247	54	4	58		167
36	Subceruleus nucleus	21	19	40	35	25	60	26	27	53	4	8	12	45	16	61	5	12	17	19	15	34	23	15	38	13	4	17	69	42	111		27	16	43	0	0	0	0	0	0	0	0	0	27	16	43		28
37	Barrington's nucleus	59	28	87	30	25	55	119	29	148	18	34	52	55	40	95	2	0	2	62	44	106	20	14	34	42	50	92	37	20	57		30	51	81	58	43	101	102	68	170	55	34	89	48	4	52		35
38	Pons	410	316	726	341	225	566	565	448	1013	189	227	416	574	391	965	70	81	151	508	447	955	352	357	709	364	208	572	718	602	1320		555	503	1058	532	360	892	1140	710	1850	493	549	1042	381	248	629		696
39	Locus ceruleus	7	7	14	4	2	6	6	6	12	2	9	11	5	10	15	0	2	2	8	7	15	2	7	9	7	7	14	6	6	12		4	3	7	5	10	15	15	14	29	15	8	23	1	0	1		10
40	Parabrachial nucleus	2	0	2	10	1	11	14	2	16	0	4	4	9	8	17	0	3	3	8	3	11	0	3	3	1	4	5	9	2	11		5	0	5	1	4	5	27	28	55	7	0	7	2	0	2		5
41	Pedunculopontine nucleus	234	118	352	124	55	179	257	189	446	59	170	229	124	130	254	27	67	94	176	230	406	69	62	131	132	41	173	280	98	378		135	163	298	201	108	309	416	189	605	143	121	264	60	10	70		251
42	Fastigial nucleus	0	0	0	0	0	0	0	0	0	0	0	0	0	0	0	0	0	0	0	0	0	0	0	0	0	0	0	0	0	0		0	0	0	0	0	0	0	0	0	0	0	0	0	0	0		0
43	Interposed nucleus	0	0	0	0	0	0	0	0	0	0	0	0	0	0	0	0	0	0	0	0	0	1	0	1	0	0	0	2	0	2		4	0	4	0	0	0	0	0	0	0	0	0	0	0	0		0
44	Red nucleus	1629	1768	3397	433	217	650	494	1372	1866	937	776	1713	564	462	1026	242	456	698	742	882	1624	535	644	1179	258	385	643	596	873	1469		624	913	1537	612	594	1206	1219	827	2046	1151	862	2013	582	582	1164		423
45	Edinger-Westphal nucleus	50	22	72	0	0	0	32	11	43	7	4	11	9	16	25	5	2	7	0	0	0	0	1	1	2	0	2	13	3	16		3	0	3	16	16	32	47	35	82	1	1	2	0	0	0		1
46	Interstitial nucleus of Cajal	52	34	86	33	22	55	62	65	127	60	45	105	33	25	58	33	23	56	13	5	18	13	8	21	62	47	109	34	15	49		17	9	26	34	36	70	72	42	114	39	14	53	7	2	9		9
47	Nucleus of Darkschewitsch	8	11	19	5	1	6	21	2	23	15	11	26	7	4	11	7	8	15	0	0	0	2	0	2	15	7	22	15	2	17		6	0	6	3	8	11	28	21	49	4	25	29	2	0	2		0
48	Midbrain	164	118	282	12	2	14	65	22	87	72	54	126	34	24	58	37	35	72	19	31	50	16	22	38	60	34	94	90	23	113		99	1509	1608	48	38	86	183	101	284	29	48	77	11	10	21		23
49	Midbrain reticular nucleus	404	387	791	177	80	257	337	273	610	385	406	791	390	221	611	106	193	299	197	257	454	137	200	337	252	148	400	311	152	463		171	240	411	241	264	505	399	420	819	166	225	391	74	120	194		337
50	Midbrain reticular nucleus, retrorubral area	24	18	42	16	6	22	59	25	84	17	14	31	41	35	76	17	5	22	15	17	32	9	13	22	22	25	47	50	13	63		18	9	27	20	23	43	77	57	134	22	17	39	0	0	0		23
51	Periaqueductal gray	355	267	622	7	1	8	142	30	172	80	34	114	71	53	124	102	117	219	25	30	55	30	28	58	217	87	304	322	79	401		93	46	139	107	102	209	356	215	571	79	157	236	20	6	26		70
52	Paraventricular hypothalamic nucleus	253	111	364	3	7	10	67	0	67	269	207	476	80	148	228	104	67	171	46	72	118	75	146	221	98	114	212	21	38	59		171	112	283	114	77	191	27	56	83	164	242	406	2	0	2		12
53	Paraventricular hypothalamic nucleus, descending division	114	24	138	19	8	27	182	10	192	198	126	324	145	257	402	67	59	126	129	98	227	187	192	379	167	119	286	82	23	105		229	70	299	118	61	179	86	98	184	68	99	167	4	2	6		9
54	Periventricular hypothalamic nucleus, intermediate part	0	5	5	0	0	0	0	5	5	16	3	19	13	25	38	3	8	11	0	1	1	47	81	128	0	1	1	12	1	13		16	29	45	7	1	8	0	2	2	0	0	0	2	0	2		85
55	Dorsomedial nucleus of the hypothalamus	45	15	60	8	17	25	13	7	20	112	95	207	72	106	178	93	49	142	12	24	36	135	59	194	10	9	19	52	17	69		68	27	95	14	20	34	4	37	41	30	28	58	18	5	23		77
56	Hypothalamus	361	237	598	109	122	231	171	83	254	384	364	748	185	203	388	277	244	521	122	111	233	226	195	421	333	207	540	305	92	397		162	152	314	201	178	379	175	169	344	197	252	449	111	75	186		188
57	Lateral hypothalamic area	190	121	311	235	149	384	292	158	450	224	366	590	210	199	409	226	166	392	277	167	444	229	241	470	280	192	472	216	75	291		185	152	337	183	81	264	278	234	512	238	275	513	173	84	257		354
58	Zona incerta	280	157	437	23	47	70	31	12	43	96	62	158	18	21	39	26	2	28	22	23	45	3	2	5	39	20	59	38	45	83		30	18	48	17	12	29	16	41	57	40	68	108	31	12	43		0
59	Anterior hypothalamic nucleus	2	2	4	0	0	0	1	0	1	3	1	4	0	0	0	1	1	2	1	2	3	0	0	0	17	10	27	5	0	5		0	1	1	5	0	5	0	6	6	4	1	5	1	0	1		0
60	Posterior hypothalamic nucleus	10	1	11	2	7	9	0	0	0	24	18	42	21	31	52	6	14	20	0	0	0	24	29	53	11	3	14	8	8	16		17	10	27	3	3	6	5	9	14	6	3	9	0	0	0		141
61	Ventromedial hypothalamic nucleus	42	17	59	2	8	10	41	11	52	42	29	71	21	12	33	45	14	59	18	16	34	35	14	49	75	69	144	17	1	18		16	6	22	16	21	37	17	13	30	4	0	4	2	0	2		20
62	Perireunensis nucleus	86	38	124	0	0	0	0	0	0	2	16	18	0	0	0	1	0	1	0	0	0	0	1	1	3	6	9	10	7	17		5	0	5	2	4	6	1	4	5	6	12	18	1	0	1		0
63	Subparafascicular nucleus, magnocellular part	6	5	11	0	0	0	1	0	1	4	3	7	2	7	9	0	0	0	2	1	3	6	11	17	31	12	43	12	5	17		7	7	14	3	1	4	8	5	13	15	5	20	0	2	2		4
64	Thalamus	92	33	125	0	0	0	0	1	1	88	46	134	0	8	8	13	3	16	0	3	3	6	8	14	4	6	10	13	2	15		71	28	99	7	8	15	5	7	12	38	41	79	2	0	2		7
65	Ventral medial nucleus of the thalamus	71	15	86	0	3	3	0	0	0	7	0	7	0	4	4	0	0	0	0	0	0	1	0	1	5	9	14	2	0	2		4	0	4	2	0	2	0	1	1	0	3	3	0	0	0		0
66	Nucleus of reuniens	190	59	249	0	0	0	0	0	0	45	24	69	0	0	0	1	0	1	0	1	1	0	0	0	0	0	0	0	0	0		22	7	29	0	0	0	0	0	0	15	21	36	0	0	0		0
67	Central amygdalar nucleus, medial part	0	2	2	0	0	0	0	0	0	0	0	0	0	0	0	0	0	0	0	0	0	0	0	0	34	0	34	0	0	0		1	0	1	0	0	0	0	0	0	0	0	0	0	0	0		0
68	Substantia innominata	0	1	1	0	0	0	0	2	2	28	35	63	0	15	15	9	10	19	34	35	69	1	0	1	0	0	0	0	0	0		1	0	1	0	0	0	0	0	0	0	0	0	0	0	0		0
69	Corticospinal	4454	4461	8915	4111	4447	8558	4668	4636	9304	3986	4215	8201	4074	3988	8062	3898	3835	7733	4436	4858	9294	3967	3764	7731	3917	3523	7440	4032	3563	7595		3711	3411	7122	3362	4052	7414	3845	4080	7925	3920	3570	7490	3200	3501	6701		4646
[truncated: 80 more columns]

## Sheet: Data - 25 grouped regions
		L1 injected - uninjured																															L3/4 injected - uninjured																Thoracic injected - uninjured
SummaryRegion ID	Summary Region Name	159-L	159-R	159-Tot	162-L	162-R	162-Tot	166-L	166-R	166-Tot	167-L	167-R	167-Tot	168-L	168-R	168-Tot	169-L	169-R	169-Tot	170-L	170-R	170-Tot	171-L	171-R	171-Tot	141-L	141-R	141-Tot	142-L	142-R	142-Tot		135-L	135-R	135-Tot	136-L	136-R	136-Tot	137-L	137-R	137-Tot	138-L	138-R	138-Tot	139-L	139-R	139-Tot		140-L
1	Solitariospinal Area	625	613	1238	424	347	771	718	378	1096	382	341	723	560	489	1049	190	116	306	320	305	625	264	316	580	565	457	1022	583	628	1211		867	737	1604	257	520	777	876	993	1869	685	784	1469	167	69	236		1633
2	Medullary Reticular Nuclei	375	344	719	274	114	388	326	285	611	299	378	677	778	802	1580	58	57	115	57	253	310	267	438	705	3133	1346	4479	2549	1603	4152		711	253	964	954	401	1355	1928	1372	3300	583	1382	1965	599	307	906		3205
3	Magnocellular Ret. Nuc.	865	1002	1867	328	121	449	644	276	920	558	692	1250	626	519	1145	83	118	201	72	53	125	144	118	262	52	47	99	69	71	140		27	71	98	512	1026	1538	818	1775	2593	52	119	171	36	58	94		815
4	Gigantocellular reticular nucleus	5955	3869	9824	2745	3106	5851	5386	3385	8771	3547	4092	7639	3968	4083	8051	3528	2615	6143	4725	5040	9765	5179	5061	10240	9266	6014	15280	7105	3666	10771		6265	5509	11774	5376	4255	9631	7751	5577	13328	3696	4785	8481	3325	2228	5553		5984
5	Lateral Reticular Nuclei	1552	690	2242	319	410	729	1216	630	1846	486	662	1148	887	1264	2151	673	581	1254	401	1194	1595	572	775	1347	1739	2596	4335	2097	188	2285		750	1779	2529	2099	684	2783	2462	503	2965	2565	997	3562	1909	68	1977		1093
6	Dorsal Reticular Nucleus	5	16	21	5	4	9	13	10	23	1	4	5	19	19	38	0	4	4	5	7	12	8	7	15	54	56	110	75	44	119		39	39	78	3	12	15	25	9	34	22	58	80	1	5	6		34
7	Raphe Nuclei	465	505	970	111	126	237	334	168	502	263	244	507	230	147	377	279	206	485	297	230	527	233	159	392	272	276	548	75	77	152		138	202	340	390	564	954	598	660	1258	227	238	465	164	123	287		379
8	Perihypoglossal Area	51	67	118	64	51	115	115	45	160	8	30	38	16	25	41	19	30	49	58	49	107	2	8	10	59	51	110	42	7	49		69	30	99	24	21	45	131	8	139	73	36	109	11	6	17		17
9	Medullary Trigeminal Area	1	6	7	1	5	6	15	8	23	1	9	10	7	11	18	1	0	1	12	18	30	7	4	11	36	44	80	7	17	24		217	0	217	11	16	27	4	1	5	3	1	4	0	0	0		79
10	Vestibular Nuclei	157	78	235	63	87	150	64	155	219	41	91	132	133	144	277	32	66	98	128	160	288	52	74	126	114	58	172	100	105	205		65	120	185	126	60	186	255	232	487	151	139	290	10	14	24		173
11	Pontine Reticular Nuclei	1670	2223	3893	1255	195	1450	1083	1560	2643	656	840	1496	1508	1481	2989	345	628	973	1120	1364	2484	1031	1083	2114	893	376	1269	2083	1489	3572		1656	1523	3179	1249	771	2020	2654	1636	4290	1592	1460	3052	456	103	559		1877
12	Superior Olivary Complex	29	16	45	14	6	20	20	8	28	12	7	19	14	12	26	13	7	20	10	5	15	28	7	35	38	57	95	28	18	46		17	25	42	19	25	44	26	6	32	17	7	24	11	2	13		13
13	Pontine Trigeminal Area	7	16	23	8	4	12	12	22	34	3	10	13	28	13	41	12	2	14	15	14	29	7	5	12	27	7	34	63	5	68		30	7	37	24	11	35	101	31	132	11	16	27	12	6	18		91
14	Pontine Central Gray Area	967	731	1698	603	444	1047	1172	844	2016	407	474	881	1048	870	1918	162	155	317	946	891	1837	656	679	1335	928	520	1448	1286	915	2201		1144	1084	2228	1198	1021	2219	1938	1407	3345	898	1124	2022	806	394	1200		1180
15	Parabrachial / Pedunculopontine	236	118	354	134	56	190	271	191	462	59	174	233	133	138	271	27	70	97	184	233	417	69	65	134	133	45	178	289	100	389		140	163	303	202	112	314	443	217	660	150	121	271	62	10	72		256
16	Cerebellospinal Nuclei	0	0	0	0	0	0	0	0	0	0	0	0	0	0	0	0	0	0	0	0	0	1	0	1	0	0	0	2	0	2		4	0	4	0	0	0	0	0	0	0	0	0	0	0	0		0
17	Red Nucleus	1629	1768	3397	433	217	650	494	1372	1866	937	776	1713	564	462	1026	242	456	698	742	882	1624	535	644	1179	258	385	643	596	873	1469		624	913	1537	612	594	1206	1219	827	2046	1151	862	2013	582	582	1164		423
18	Midbrain Midline Nuclei	274	185	459	50	25	75	180	100	280	154	114	268	83	69	152	82	68	150	32	36	68	31	31	62	139	88	227	152	43	195		125	1518	1643	101	98	199	330	199	529	73	88	161	20	12	32		33
19	Midbrain Reticular Nuclei	428	405	833	193	86	279	396	298	694	402	420	822	431	256	687	123	198	321	212	274	486	146	213	359	274	173	447	361	165	526		189	249	438	261	287	548	476	477	953	188	242	430	74	120	194		360
20	Periaqueductal Gray	355	267	622	7	1	8	142	30	172	80	34	114	71	53	124	102	117	219	25	30	55	30	28	58	217	87	304	322	79	401		93	46	139	107	102	209	356	215	571	79	157	236	20	6	26		70
21	Hypothalamic Periventricular Zone	367	140	507	22	15	37	249	15	264	483	336	819	238	430	668	174	134	308	175	171	346	309	419	728	265	234	499	115	62	177		416	211	627	239	139	378	113	156	269	232	341	573	8	2	10		106
22	Hypothalamic Lateral Area	876	530	1406	375	335	710	507	260	767	816	887	1703	485	529	1014	622	461	1083	433	325	758	593	497	1090	662	428	1090	611	229	840		445	349	794	415	291	706	473	481	954	505	623	1128	333	176	509		619
23	Hypothalamic Medial Area	54	20	74	4	15	19	42	11	53	69	48	117	42	43	85	52	29	81	19	18	37	59	43	102	103	82	185	30	9	39		33	17	50	24	24	48	22	28	50	14	4	18	3	0	3		161
24	Thalamus	445	150	595	0	3	3	1	1	2	146	89	235	2	19	21	15	3	18	2	5	7	13	20	33	43	33	76	37	14	51		109	42	151	14	13	27	14	17	31	74	82	156	3	2	5		11
25	Corticospinal	4454	4461	8915	4111	4447	8558	4668	4636	9304	3986	4215	8201	4074	3988	8062	3898	3835	7733	4436	4858	9294	3967	3764	7731	3917	3523	7440	4032	3563	7595		3711	3411	7122	3362	4052	7414	3845	4080	7925	3920	3570	7490	3200	3501	6701		4646
[truncated: 80 more columns]
