# Supplementary material for: Brain-wide analysis of the supraspinal connectome reveals anatomical correlates to functional recovery after spinal injury
Source: eLife. 2022 Jul 15;11:e76254. doi: 10.7554/eLife.76254 (PMC9345604; doi:10.7554/eLife.76254)
Supplement: Source data 2. [file elife-76254-data2.xlsx]

## Sheet: Fig1-supp1
	Cortex				Red Nucleus				Brainstem
	Animal 1	Animal 2	Animal 3	Animal 4	Animal 1	Animal 2	Animal 3	Animal 4	Animal 1	Animal 2	Animal 3	Animal 4
Cytoplasmic mScarlet	4319	2913	3650	2568	123	124	155	154	407	242	207	143
Nuclear mScarlet	7284	6026	7265	6048	1036	1093	1406	1197	3327	3298	3556	3156

## Sheet: Fig1-supp2
	Cortex							Hypothalamus							Red Nucleus							Dorsal Pons							Reticular							Dorsal Caudal Medulla
	Animal 1	Animal 2	Animal 3	Animal 4	Animal 5	Animal 6	Animal 7	Animal 1	Animal 2	Animal 3	Animal 4	Animal 5	Animal 6	Animal 7	Animal 1	Animal 2	Animal 3	Animal 4	Animal 5	Animal 6	Animal 7	Animal 1	Animal 2	Animal 3	Animal 4	Animal 5	Animal 6	Animal 7	Animal 1	Animal 2	Animal 3	Animal 4	Animal 5	Animal 6	Animal 7	Animal 1	Animal 2	Animal 3	Animal 4	Animal 5	Animal 6	Animal 7
H2B-mScarlet	6206	6214	6704	7284	6026	7265	6048	950	659	927	361	565	479	660	1335	1283	1652	1036	1093	1406	1197	1269	1639	1712	1547	1824	2709	2176	3835	3569	3928	3327	3298	3556	3156	211	280	321	301	318	383	246
H2B-mGL	7440	7595	8088	8062	7733	9294	7731	1246	792	1185	1039	925	1154	1118	1604	1746	1837	1700	1658	1700	1466	1804	2695	2318	3364	3332	4013	3425	8184	6963	6214	6477	5945	5998	5413	357	374	402	350	364	409	300

## Sheet: Fig1-supp3
Supplemental Figure 1a - Left versus Right
	Cortex							Hypothalamus							Red Nucleus							Dorsal Pons							Dorsal Caudal Medulla
	Animal 1	Animal 2	Animal 3	Animal 4	Animal 5	Animal 6	Animal 7	Animal 1	Animal 2	Animal 3	Animal 4	Animal 5	Animal 6	Animal 7	Animal 1	Animal 2	Animal 3	Animal 4	Animal 5	Animal 6	Animal 7	Animal 1	Animal 2	Animal 3	Animal 4	Animal 5	Animal 6	Animal 7	Animal 1	Animal 2	Animal 3	Animal 4	Animal 5	Animal 6	Animal 7
H2B-mGl Left	3917	4032	4136	4074	3898	4436	3967	590	543	582	383	495	584	589	631	834	934	895	793	849	704	689	1523	992	1606	1570	1923	1730	190	204	198	171	190	178	135
H2B-mGL Right	3523	3563	3952	3988	3835	4858	3764	656	249	603	656	430	570	529	973	912	903	805	865	851	762	1115	1172	1326	1758	1762	2090	1695	167	170	204	179	174	231	165
Supplemental Figure 1b - 2 weeks versus 4 weeks
	Cortex							Hypothalamus							Red Nucleus							Dorsal Pons							Reticular							Dorsal Caudal Medulla
	Animal 1	Animal 2	Animal 3	Animal 4	Animal 5	Animal 6	Animal 7	Animal 1	Animal 2	Animal 3	Animal 4	Animal 5	Animal 6	Animal 7	Animal 1	Animal 2	Animal 3	Animal 4	Animal 5	Animal 6	Animal 7	Animal 1	Animal 2	Animal 3	Animal 4	Animal 5	Animal 6	Animal 7	Animal 1	Animal 2	Animal 3	Animal 4	Animal 5	Animal 6	Animal 7	Animal 1	Animal 2	Animal 3	Animal 4	Animal 5	Animal 6	Animal 7
H2B-mGL 2 weeks	7440	7595	8088	8062	7733	9294	7731	1246	792	1185	1039	925	1154	1118	1604	1746	1837	1700	1658	1700	1466	1804	2695	2318	3364	3332	4013	3425	8184	6963	6214	6477	5945	5998	5413	357	374	402	350	364	409	300
H2B-mGL 4 weeks	7273	7532	8204	6458				807	801	894	323				1690	1335	1512	895				2987	3133	3074	2413				4744	6004	5397	4107				316	342	296	308

## Sheet: Fig1-supp5
		L1 injected											L3/4 injected						T10 injected
SummaryRegion ID	Summary Region Name	159	162	166	167	168	169	170	171	141	142		135	136	137	138	139		140	145	117	144
1	Solitariospinal Area	1238	771	1096	723	1049	306	625	580	1022	1211		1604	777	1869	1469	236		3570	1103	921	599
2	Medullary Reticular Nuclei	719	388	611	677	1580	115	310	705	4479	4152		964	1355	3300	1965	906		6112	1393	1623	2335
3	Magnocellular Ret. Nuc.	1867	449	920	1250	1145	201	125	262	99	140		98	1538	2593	171	94		1566	738	0	542
4	Gigantocellular reticular nucleus	9824	5851	8771	7639	8051	6143	9765	10240	15280	10771		11774	9631	13328	8481	5553		10953	6643	8673	5528
5	Lateral Reticular Nuclei	2242	729	1846	1148	2151	1254	1595	1347	4335	2285		2529	2783	2965	3562	1977		2344	6809	2935	633
6	Dorsal Reticular Nucleus	21	9	23	5	38	4	12	15	110	119		78	15	34	80	6		71	10	403	60
7	Raphe Nuclei	970	237	502	507	377	485	527	392	548	152		340	954	1258	465	287		660	241	16	559
8	Perihypoglossal Area	118	115	160	38	41	49	107	10	110	49		99	45	139	109	17		49	28	658	3
9	Medullary Trigeminal Area	7	6	23	10	18	1	30	11	80	24		217	27	5	4	0		254	39	526	30
10	Vestibular Nuclei	235	150	219	132	277	98	288	126	172	205		185	186	487	290	24		318	99	532	220
11	Pontine Reticular Nuclei	3893	1450	2643	1496	2989	973	2484	2114	1269	3572		3179	2020	4290	3052	559		3313	1224	2471	1240
12	Superior Olivary Complex	45	20	28	19	26	20	15	35	95	46		42	44	32	24	13		58	75	66	31
13	Pontine Trigeminal Area	23	12	34	13	41	14	29	12	34	68		37	35	132	27	18		132	4	474	26
14	Pontine Central Gray Area	1698	1047	2016	881	1918	317	1837	1335	1448	2201		2228	2219	3345	2022	1200		2191	545	2810	3603
15	Parabrachial / Pedunculopontine	354	190	462	233	271	97	417	134	178	389		303	314	660	271	72		427	109	583	285
16	Cerebellospinal Nuclei	0	0	0	0	0	0	0	1	0	2		4	0	0	0	0		0	0	108	0
17	Red Nucleus	3397	650	1866	1713	1026	698	1624	1179	643	1469		1537	1206	2046	2013	1164		1057	944	1566	1821
18	Midbrain Midline Nuclei	459	75	280	268	152	150	68	62	227	195		1643	199	529	161	32		82	268	894	392
19	Midbrain Reticular Nuclei	833	279	694	822	687	321	486	359	447	526		438	548	953	430	194		674	532	1759	987
20	Periaqueductal Gray	622	8	172	114	124	219	55	58	304	401		139	209	571	236	26		160	270	875	163
21	Hypothalamic Periventricular Zone	507	37	264	819	668	308	346	728	499	177		627	378	269	573	10		308	349	502	91
22	Hypothalamic Lateral Area	1406	710	767	1703	1014	1083	758	1090	1090	840		794	706	954	1128	509		1430	952	1172	837
23	Hypothalamic Medial Area	74	19	53	117	85	81	37	102	185	39		50	48	50	18	3		260	138	233	98
24	Thalamus	595	3	2	235	21	18	7	33	76	51		151	27	31	156	5		32	28	78	17
25	Corticospinal	8915	8558	9304	8201	8062	7733	9294	7731	7440	7595		7122	7414	7925	7490	6701		8813	11459	5863	9829

## Sheet: Fig2
	Cervical injection				Lumbar injection					Lumbar Projection Index
	173	174	175	176	173	174	175	176		173	174	175	176		Average	SEM	P value (Versus whole brain, Repeated Measures ANOVA with post-hoc Dunnett's)
Solitariospinal Area	1534	963	1471	1261	99	476	259	330		6.06246	33.0785	14.9711	20.7417		18.7134	5.6607	0.5996
Medullary Reticular Nuclei	2830	1159	3479	2927	17	60	110	151		0.59712	4.92207	3.06492	4.90578		3.37247	1.02264	0.0048
Magnocellular Ret. Nuc.	1243	697	694	313	200	1327	787	498		13.86	65.5632	53.1398	61.4057		48.4922	11.8292	0.4414
Gigantocellular Ret. Nuc.	11812	13203	12200	11830	919	4530	6132	2721		7.2186	25.5456	33.4497	18.6997		21.2284	5.55778	0.8349
Lateral Reticular Nuclei	3612	3407	5632	5909	152	421	848	769		4.03826	10.9979	13.0864	11.5154		9.9095	2.00682	0.002
Dorsal Reticular Nucleus	174	437	368	306	8	18	7	12		4.3956	3.95604	1.86667	3.77358		3.49797	0.559218	0.0239
Raphe Nuclei	519	301	362	381	126	572	317	501		19.5349	65.5212	46.6863	56.8027		47.1363	9.97282	0.3455
Perihypoglossal Area	642	199	849	1000	5	25	88	50		0.772798	11.1607	9.39168	4.7619		6.52177	2.3435	0.0074
Medullary Trigeminal Area	268	292	912	115	1	16	44	88		0.371747	5.19481	4.60251	43.3498		13.3797	10.0476	0.798
Vestibular Nuclei	1645	2638	1797	2584	40	289	134	286		2.37389	9.87359	6.93941	9.96516		7.28801	1.78238	0.0022
Pontine Reticular Nuclei	3838	4594	3476	3118	1411	2603	2192	2690		26.8813	36.1678	38.6733	46.3154		37.0095	4.00684	0.0892
Superior Olivary Complex	17	113	31	32	11	77	28	10		39.2857	40.5263	47.4576	23.8095		37.7698	4.98865	0.6257
Pontine Trigeminal Area	119	108	118	90	14	45	9	31		10.5263	29.4118	7.08661	25.6198		18.1611	5.50109	0.6584
Pontine Central Gray Area	1476	1736	1154	919	871	2231	1356	1592		37.1112	56.239	54.0239	63.401		52.6938	5.56626	0.0213
Parabrach. / PPN	650	1247	628	787	282	818	239	663		30.2575	39.6126	27.5663	45.7241		35.7901	4.19858	0.3825
Red Nucleus	1432	2244	1525	1673	1224	1957	1806	2522		46.0843	46.5841	54.218	60.1192		51.7514	3.35311	0.016
Midbrain Midline Nuclei	808	1960	340	1410	135	462	47	348		14.316	19.0751	12.1447	19.7952		16.3328	1.85104	0.1325
Midbrain Reticular Nuclei	1492	3344	884	2137	318	1081	333	688		17.5691	24.4294	27.3624	24.354		23.4287	2.07498	0.3271
Periaqueductal Gray	407	1535	210	615	130	796	75	658		24.2086	34.1484	26.3158	51.6889		34.0904	6.24371	0.7889
Hypothalamic Periv. Zone	234	96	4	29	229	285	181	666		49.46	74.8031	97.8378	95.8273		79.4821	11.2817	0.0465
Hypothalamic Lateral Area	1555	2000	750	1082	328	1286	245	1415		17.419	39.1357	24.6231	56.668		34.4615	8.67092	0.9217
Hypothalamic Medial Area	53	564	23	132	19	227	43	221		26.3889	28.6979	65.1515	62.6062		45.7111	10.5126	0.5344
Thalamus	117	508	7	26	63	1058	31	320		35	67.5607	81.5789	92.4855		69.1563	12.4759	0.1311
Corticospinal	16233	15733	18051	16435	5598	3563	6617	6069		25.6424	18.465	26.8242	26.9685		24.475	2.02526	0.9978
Whole brain	52710	59078	54965	55111	12200	24223	21928	23299		18.7953	29.0789	28.5176	29.7143		26.5265	2.58865

## Sheet: Fig3
		Animal 226					Animal 230					Animal 231					Animal 232					Averages
		only mGl	only mSc	Both	%mGl also mSc		only mGl	only mSc	Both	%mGl also mSc		only mGl	only mSc	Both	%mGl also mSc		only mGl	only mSc	Both	%mGl also mSc		mGl (lumbar)	mSc (Cervical)	Both	%mGl also mSc
	Raphe	639	244	373	36.8577		683	148	342	33.3659		560	122	272	32.6923		771	156	398	34.0462		663.25	167.5	346.25	34.2992
	Gi	2946	2541	3282	52.6975		3701	2870	3054	45.211		3349	2834	3815	53.2524		4290	2410	3297	43.4559		3571.5	2663.75	3362	48.4892
	MedRet	418	1343	163	28.0551		259	607	161	38.3333		404	755	263	39.4303		655	1058	350	34.8259		434	940.75	234.25	35.0542
	Sol	247	474	221	47.2222		246	517	257	51.0934		331	459	282	46.0033		329	715	278	45.799		288.25	541.25	259.5	47.3756
	CerSp	787	1013	71	8.27506		1412	736	83	5.55184		1317	1128	150	10.2249		1544	1529	164	9.60187		1265	1101.5	117	8.46599
	DP	902	240	371	29.1438		476	143	169	26.2016		515	259	611	54.2629		964	234	360	27.1903		714.25	219	377.75	34.5925
	DP2	1267	1123	762	37.5554		1440	890	1044	42.029		2204	1872	1883	46.0729		2440	2619	2069	45.886		1837.75	1626	1439.5	43.924
	RN	2143	2536	348	13.9703		1490	1082	103	6.46579		2254	2704	501	18.1851		2072	2598	386	15.7038		1989.75	2230	334.5	14.3917
	PVH	877	315	235	21.1331		459	316	167	26.6773		758	241	195	20.4617		473	80	80	14.4665		641.75	238	169.25	20.8693
	LHA	454	710	321	41.4194		345	514	467	57.5123		447	648	642	58.9532		394	729	563	58.8297		410	650.25	498.25	54.8582
	CST	2476	5667	3209	56.4468		2909	5878	4219	59.1891		3734	13784	3961	51.475		3635	15192	3035	45.5022		3188.5	10130.2	3606	53.0723

## Sheet: Fig3-supp3
	Panel G					Panel H				Panel I
		Animal 219	Animal 220	Animal 217		mGl only	Dual labeled			Average mGl intensity	Average mSc intensity
	mGl only	2430	2784	1867		33685.5	35074.6			35074.6	2413.78
	mSc only	253	533	366		38790.5	42878.1			42878.1	2554.29
	Both	4543	4665	3729		34101.8	34358.3			34358.3	3520.31
						29567.6	35494.6			35494.6	3614.57
						33103.5	4653.07			4653.07	751.034
						27379.9	32684.4			32684.4	1382.93
						27930.2	34565			34565	2501.27
						29714.3	37882.7			37882.7	2412.3
						25263.5	36922.3			36922.3	1345.07
						29550.5	35427.1			35427.1	1319.17
						25701.1	21991			21991	3083.28
						36342	31389.3			31389.3	1509.58
						34693.8	37062.1			37062.1	1151.13
						34277.9	32271.6			32271.6	2853.69
						35498.7	26026.4			26026.4	1016.06
						37339	26347.7			26347.7	688.767
						24832.7	28350			28350	1291.63
						27980.6	28917.7			28917.7	889.885
						26381.2	31046.3			31046.3	2339.48
						23129.9	29404.4			29404.4	1440.45
						29309.2	29596.2			29596.2	1402.24
						30690.4	29631.5			29631.5	1413.54
						26767.6	31045.7			31045.7	1226.83
						33440.8	37671.1			37671.1	1088.24
						19643.3	39451.4			39451.4	822.56
						23998	29734.1			29734.1	1150.14
						5171.46	33975.9			33975.9	693.138
						25675.7	31180.9			31180.9	1855.52
						2411.5	33790.2			33790.2	1454.76
						30853.1	21831.7			21831.7	5158.28
						25207.4	31166.4			31166.4	2128.33
						17104.1	27209.9			27209.9	1088.05
						35029.2	27805.7			27805.7	2066.2
						35922.7	23897.8			23897.8	961.607
						31965.4	32317.8			32317.8	3799.73
						26641.1	31800.7			31800.7	2458.83
						30757.4	34395.6			34395.6	3173.38
						29258.7	43675.5			43675.5	2376.61
						18523.5	32300.7			32300.7	1319.97
						36280.3	37473			37473	1395.97
						33701.3	35334.8			35334.8	1785.67
						36279.3	38965.7			38965.7	1283
						33038.8	39512.1			39512.1	1149.03
						35677.9	38950.6			38950.6	738.074
						35202.3	42309.7			42309.7	2255.84
						29193.7	37194.7			37194.7	2475.93
						29886.2	37678.2			37678.2	3060.62
						39018.5	33410.7			33410.7	4124.7
						36001	31857.5			31857.5	5428.86
						33332.8	36036			36036	1603.81
						6055.77	21816.2			21816.2	5002.03
						3433.88	31927.2			31927.2	4203.34
						3462.64	39968.1			39968.1	1721.14
						33393.1	36887			36887	1601.93
						43030.6	34456.1			34456.1	2674.09
						35059.3	40947.6			40947.6	1603.57
						32199	29554.4			29554.4	2221.59
						34461.2	27529			27529	1186.17
						34561.8	31319			31319	1970.72
						13027.3	24322.4			24322.4	990.931
						32152.9	39599.6			39599.6	1491.53
						43190.3	42205.6			42205.6	1522.68
						36555	38364.3			38364.3	1267.79
						36429.2	37909.3			37909.3	2293.5
						34036.4	35637			35637	1316.25
						24559.7	34994.9			34994.9	1732.75
						35190.7	65535			65535	4745.38
						30429.8	36472.8			36472.8	2607.73
						26344.1	36364.1			36364.1	3144.96
						18442.2	39617			39617	928.273
						15506	30265.6			30265.6	3767.31
						6773.43	29841.2			29841.2	5002.9
						4126.03	29683.5			29683.5	3980.9
						15774.4	39152			39152	2207.25
						20259.4	22348.3			22348.3	1180.86
						17652.8	36568			36568	1090.24
						20229.2	30740.1			30740.1	3882.76
						13070.5	36460.5			36460.5	1362.1
						18130.7	41446.9			41446.9	1373.79
						17035.3	35219.6			35219.6	3907.19
						15012.3	49174.3			49174.3	1786.89
						20172.2	33036.4			33036.4	1195.23
						20305.8	35437.2			35437.2	1863.31
						23999.7	19403.6			19403.6	7975.18
						15118.9	32315.7			32315.7	1127.27
						14863.9	20626.9			20626.9	3447.6
						16682.3	20466.9			20466.9	4504.76
						13562.7	24527.9			24527.9	751.2
						17555.8	27488.6			27488.6	3005.78
						22917.9	21310.3			21310.3	809.964
						31019.1	26838.3			26838.3	6348.72
						20903	19960.4			19960.4	5568.79
						20377.2	18802.6			18802.6	3848.03
						16057	21467.6			21467.6	1908.18
						16281.2	24614.3			24614.3	1397.73
						19088.8	28292.9			28292.9	994.833
						13305	26948.5			26948.5	545.172
						19415.8	26279.7			26279.7	996.935
						27060.8	28659.2			28659.2	1291.86
						17984.4	32800.6			32800.6	1186.88
						18655.8	27519.9			27519.9	1420.96
						29676.3	24642			24642	1970.61
						29235.4	24538.6			24538.6	1111.11
						23227.9	33618.8			33618.8	2520.29
						9714.5	39992.1			39992.1	1517.44
						20665.3	36224.5			36224.5	1433.14
						16822.6	33249.2			33249.2	2757.79
						15281.1	19605.2			19605.2	8862.69
						23988.8	29251.6			29251.6	3019.04
						17297.5	34975.6			34975.6	2805.21
						2930.87	27316.5			27316.5	1289.89
						18931	30213.6			30213.6	954.208
						27558.1	35839.7			35839.7	3795.1
						23537.7	27635.3			27635.3	2205.1
						35775.8	27313.9			27313.9	1350.62
						29003.4	41479.5			41479.5	1023.15
						24085.3	35620.8			35620.8	753.741
						24588	39033.3			39033.3	1659.92
						27272.5	35003.7			35003.7	1826.29
						24546.1	28302.8			28302.8	1820.57
						24500.1	29703.3			29703.3	2677.96
						21815.2	39673.2			39673.2	2493.6
						30293.8	40767.2			40767.2	1313.17
						30071.2	34173.7			34173.7	3491.04
						34105.1	32327.7			32327.7	1375.21
						27234	18640.3			18640.3	1253.06
						20692	17285.6			17285.6	2149.48
						26212.1	17421.5			17421.5	2601.83
						31026.3	17707.3			17707.3	698.034
						16922.9	16257.3			16257.3	1362.07
						21318.3	19223.2			19223.2	3271.74
						14217.8	26852.2			26852.2	1143.39
						26426.4	14577			14577	3287.1
						34542.5	19731.7			19731.7	3917
						21287.2	29182.9			29182.9	1749.38
						34256.5	20103.2			20103.2	2862.46
						31711	28384.1			28384.1	2021.04
						37638.9	19798.2			19798.2	4052.38
						34825.5	29810.2			29810.2	2136.25
						29852.6	26961.2			26961.2	2398.31
						16334.8	20951.6			20951.6	2178.24
						28636	15238.5			15238.5	3818.9
						28682.6	22296.2			22296.2	1032.17
						28383.8	23642.7			23642.7	2717.73
						13964.6	14958.1			14958.1	3584.86
						2532.12	23153.8			23153.8	1475.88
						2894.96	17311.2			17311.2	4889.03
						12265.3	21169.2			21169.2	775.387
						17122.9	21651.6			21651.6	1996
						11429.1	18559.6			18559.6	5032.63
						14867.8	20125.1			20125.1	4481.33
						22868.2	24434.7			24434.7	2015.29
						10994.9	24473.5			24473.5	3085.54
						19609.2	23938.1			23938.1	2782.69
						20459.4	26891			26891	1195.6
						6342.97	22851.8			22851.8	2465.9
						20092.3	26548.2			26548.2	1886.46
						13587.1	28170.2			28170.2	4518.21
						17950.7	26102			26102	1395.87
						20039.1	23365			23365	869.25
						21429	25469.7			25469.7	1325.11
						13985.9	18427.5			18427.5	911.034
						17611.3	24416.7			24416.7	1080.6
						18205.2	21456.3			21456.3	2031.4
						25370.9	21466.3			21466.3	3103.91
						11802.2	28060			28060	848.103
						13310.9	22966.3			22966.3	851.565
						3627.42	8005.41			8005.41	1982.69
						24861.9	34730			34730	1717.77
						25029.6	38518.1			38518.1	906.714
						18516.7	18265			18265	8177.93
						21020.2	27988.4			27988.4	2605.48
						16401.6	17541			17541	6126.24
						22958.4	19362			19362	4559.59
						17107.9	32480.3			32480.3	1555.93
						24201	24694.7			24694.7	3494.9
						22482.5	30446.1			30446.1	1354.96
						21450.3	37348.6			37348.6	1119.83
						23327.3	28973.6			28973.6	1795.62
						24564.1	15011.8			15011.8	7326.38
						26294.2	27179.3			27179.3	2178.2
						22844.6	35921.8			35921.8	2979.72
						21697.7	34027			34027	1477.55
						21565.9	25241.7			25241.7	1651.83
						15479.9	26301.6			26301.6	3813.87
						18332.2	23733.4			23733.4	2036.14
						22346.7	23499.2			23499.2	1769.31
						25171.8	23103.3			23103.3	921.5
						22710.2	24936.9			24936.9	1216.94
						20298.5	34140.7			34140.7	1474.74
						17720.4	34222.7			34222.7	3558.83
						23327.6	27334.8			27334.8	1199.64
						19973.2	27168.5			27168.5	2621.37
						15934.1	28719.2			28719.2	2850.39
						22356.9	6752.73			6752.73	12682.8
						18523.3	38302.6			38302.6	2297.8
						18682.7	28369.3			28369.3	1136.28
						18637.4	30505.6			30505.6	2580.24
						17961.3	32220.8			32220.8	1171.04
						19012	28247.3			28247.3	2842.45
						17372.5	26960.7			26960.7	1876.61
						19268.6	15086.4			15086.4	5599.23
						19968.9	27106.6			27106.6	2799.11
						22759.7	22597.2			22597.2	1350.46
						32017.9	26898.1			26898.1	803
						15147.3	20889.3			20889.3	3664.35
						27163	10795.6			10795.6	668.556
						23067.2	15386.7			15386.7	1109.13
						25860.4	35786.5			35786.5	2024.45
						23454.4	50828.5			50828.5	3923.63
						22192.5	42863.6			42863.6	3304.71
						24965.5	33325.4			33325.4	1918.07
						37749.8	27475.9			27475.9	1039.73
						27842.3	36332.7			36332.7	2259.6
						23788.2	30744.9			30744.9	4537.69
						38159.9	31692			31692	2256.19
						19136	28962.5			28962.5	4310.35
						24874.8	21413.1			21413.1	4323.59
						25309.2	27286.7			27286.7	3190.52
						23267.2	29098.1			29098.1	3186.61
						25672.6	24286.3			24286.3	3849.57
						22596.9	25390.6			25390.6	1634.93
						24731.1	35060.5			35060.5	3496.87
						20985.4	42107.1			42107.1	2175.29
						24690	28870.3			28870.3	1715.88
						22354.7	25258.2			25258.2	2242.97
						25064.8	17668.5			17668.5	7545.29
						22006.7	27646			27646	1634.04
						19826.6	25617.7			25617.7	1585.1
						24872	30954.7			30954.7	2170.5
						17202.1	28282.3			28282.3	1371.62
						20625.9	22701.3			22701.3	1881.33
						17496.5	31247.4			31247.4	1761.1
						19864.1	37735.6			37735.6	4476.19
						16814.2	37387.4			37387.4	1954.45
						24082	34488.9			34488.9	3525.41
						22954.2	27175.2			27175.2	2419.24
						22465.9	30822.1			30822.1	1178.69
						25334.5	33560.8			33560.8	2686.45
						17631.2	25984			25984	1799.37
						23331.4	30178.4			30178.4	2687.74
						20013.1	29853.6			29853.6	3307.85
						20270	25066.1			25066.1	2395.64
						18610.9	22744.4			22744.4	2247.92
						24073.3	23525.4			23525.4	2912.55
						20895.6	31921.3			31921.3	2362.73
						18731.3	27538.8			27538.8	1709.96
						19395.3	24711.6			24711.6	2947.9
						22788.8	29382.6			29382.6	1759.55
						10335.2	34419.9			34419.9	2000.9
						26131.6	33437.3			33437.3	3658.28
						37160.8	32278.5			32278.5	581.429
						31395.5	65535			65535	11842.4
						34942.1	31247.8			31247.8	567.071
						33741.8	28858.7			28858.7	1904.67
						28719	29490.3			29490.3	2446.66
						32980.2	29253.7			29253.7	1636.86
						33030.4	26668			26668	2214.33
						29784.6	29263			29263	724.393
						25664.2	27895.4			27895.4	2596.83
						30244.8	26021.7			26021.7	2624.04
						29951.2	38319.3			38319.3	3440.93
						22459.2	26740.5			26740.5	1953.86
						24700.8	31254.8			31254.8	3537.32
						25446.1	23453.9			23453.9	729.391
						30539.7	22493.2			22493.2	5369.12
						20155.7	32500			32500	1649.41
						25376.9	18066.2			18066.2	1577.63
						27357.2	15936.4			15936.4	5942.36
						20776.6	24815.6			24815.6	2226.87
						27746.6	20878.5			20878.5	1670.07
						12080.8	26497.7			26497.7	1697.2
						30026.2	27334.4			27334.4	1816.87
						29227.6	30351.8			30351.8	1726.48
						25361.4	25461.7			25461.7	1742.15
						21991.5	23508.6			23508.6	2081.54
						24253	23307.5			23307.5	3227.61
						23028.8	22375.8			22375.8	1144.07
						21793.4	23890			23890	2953.63
						31584	29570.2			29570.2	479.367
						25504.8	32896.4			32896.4	2803.07
						30143.6	31502.3			31502.3	656.107
						32039.5	38361.6			38361.6	2702.07
						30095.6	28214.9			28214.9	689.517
						29097.6	35299.4			35299.4	2094.17
						33324.4	28707.6			28707.6	1953.48
						27868.1	23817.3			23817.3	1404.07
						34836.4	32118.4			32118.4	1692.21
						33517.7	26974.1			26974.1	2582.29
						29987.5	24856.4			24856.4	3615.75
						30630.6	24873.1			24873.1	2297.83
						23075.6	22113.3			22113.3	4635.63
						31218.9	23922			23922	2553.79
						31863	20679.4			20679.4	2824.8
						19941.3	26351			26351	2368.18
						31250	31977.1			31977.1	2389.36
						23788.3	28421.4			28421.4	860.482
						26314.6	21622.4			21622.4	4280.38
						27218.2	32056.2			32056.2	2488.48
						31984.8	27597			27597	3431.43
						23385	31077.7			31077.7	2269.1
						26069.8	42295.6			42295.6	3303.54
						23659.8	19983.6			19983.6	4354.04
						24654.4	27617.6			27617.6	3067.78
						26267.5	32252.6			32252.6	1700.73
						23255.9	31114.6			31114.6	1267.72
						20874.7	22954.2			22954.2	2986.68
						19609	28099			28099	2437.77
						32804.8	25005.7			25005.7	2761.79
						31752.3	22397.9			22397.9	4156.68
						31207.2	23520.9			23520.9	781.759
						33904.5	25521.6			25521.6	4260.58
						28008.3	30603.5			30603.5	1141.35
						25610.6	24665.1			24665.1	1257.31
						39394.2	24912.4			24912.4	1698
						33821.3	24356.2			24356.2	2296.63
						25533.8	20395.1			20395.1	2799.55
						26910	36757.8			36757.8	3560.55
						26075	32248.6			32248.6	1591.9
						27303.9	26190.7			26190.7	3592.19
						28927.7	29583.4			29583.4	3030.37
						25297.2	32128.4			32128.4	2023.48
						25924.7	32862.6			32862.6	1478.2
						7925.43	39983.6			39983.6	1839.07
						27918.5	30074.7			30074.7	2684.24
						6774.25	47597.6			47597.6	1622.31
						32724.7	21925.6			21925.6	4350.93
						30205.4	43757.7			43757.7	2333.11
						33038.3	28865.6			28865.6	3510.03
						34171.1	33610.6			33610.6	2513.31
						22521	41785.9			41785.9	2089.93
						33991.2	31393.7			31393.7	2222.88
						29183.2	30879.4			30879.4	2377.23
						31929.4	44844.8			44844.8	3486.47
						28273.6	28617			28617	1843.79
						29929.3	25731.8			25731.8	1947.41
						29548.5	28433.7			28433.7	1736.28
						26520.8	23656.9			23656.9	1977
						26359.3	24357.5			24357.5	1782.58
						30505.1	32683.7			32683.7	1772.45
						25231.9	39946			39946	2758.4
						6969.25	24031.7			24031.7	4501.7
						35859	24575.8			24575.8	1555.62
						20933.2	22920.8			22920.8	1360.4
						10679.9	25077.2			25077.2	2137.34
						26316	24571			24571	4357.43
						26375	28731.7			28731.7	3164.59
						19222.5	22720.2			22720.2	1812.83
						13234.3	26108.1			26108.1	1746.41
						4984.57	14480.7			14480.7	8399.16
						3085.39	23189.8			23189.8	912.31
						15127	36607.3			36607.3	1864.39
						17728.7	28605.4			28605.4	1580.04
						27511.6	23714.9			23714.9	2871.29
						17272.2	23069.4			23069.4	1957.96
						22240.6	36587.5			36587.5	2608.21
						19699.7	32019.2			32019.2	920.733
						16853.3	30067.5			30067.5	2051.38
						16442.3	29772.7			29772.7	1851.79
						16344.2	35130.7			35130.7	1303.34
						17300.7	35361.6			35361.6	1051.27
						11593.3	36303.2			36303.2	1170.13
						25842.6	46546.6			46546.6	1352.62
						4964.74	34217.5			34217.5	2025.86
						24313.2	38486.9			38486.9	1723.04
						23815	33689.3			33689.3	2457.29
						26286	33402.2			33402.2	665.885
						24683.9	28123.7			28123.7	1133.48
						27356.1	12835.4			12835.4	10069.3
						15464.6	30762.8			30762.8	1108.37
						22725.6	38347.3			38347.3	923.931
						21016	36703.1			36703.1	1119.24
						16851.3	48276.3			48276.3	1137.96
						24562.8	33244.2			33244.2	2561.62
						21691.3	31284.9			31284.9	1458.48
						21912.6	37651.6			37651.6	3956.96
						17595.2	30748.4			30748.4	4978.5
						17918.4	28890.4			28890.4	2711.13
						20824.5	34075.8			34075.8	850.115
						20874.3	32508.2			32508.2	1836.82
						13050.5	17181			17181	5315.86
						21672.8	24798.3			24798.3	2012.21
						18919.7	33160.3			33160.3	1542.17
						20616.3	43685.2			43685.2	2683.77
						4344.73	24868.1			24868.1	1553.23
						27751.4	33424.8			33424.8	2119.18
						21402.5	25501.8			25501.8	2051.82
						32241.4	24539.6			24539.6	1386.52
						26187.6	45984			45984	1099.5
						27748.9	33407.2			33407.2	1506.03
						20340	23763.5			23763.5	3991.64
						25126.5	16929.7			16929.7	4439.22
						24959.9	26650.2			26650.2	831.483
						22871.3	26491.6			26491.6	1181.17
						26586	33994			33994	3524.6
						26071.7	26473.9			26473.9	2429.07
						9422.07	11421.6			11421.6	2666.58
						26433.4	30083			30083	1495.27
						25204	44241.4			44241.4	960.5
						22662	27426.9			27426.9	1809.96
						27304.1	28962.4			28962.4	3159
						20268.7	30783.9			30783.9	2094.71
						23842.4	40716.2			40716.2	2240.71
						21517.6	30201.4			30201.4	2259.54
						16636.6	28405.7			28405.7	5050.31
						15152.7	32134.3			32134.3	1036.4
						29726	27444.8			27444.8	1653.74
						35304.4	31904			31904	1466.56
						27192.6	32237.7			32237.7	1258.04
						30351.4	30904.2			30904.2	1962.63
						31828.4	17628.8			17628.8	5298.4
						39733	31788.8			31788.8	1289.59
						32710.8	27357.8			27357.8	1192.03
						24390.8	18235.8			18235.8	5179.42
						19951.3	22143.5			22143.5	2021.54
						27208.3	30596			30596	1166.97
						32935.3	18092.2			18092.2	1229.48
						24481.4	23314.1			23314.1	2597.24
						30781	30051.9			30051.9	2426.04
						35763.3	35207			35207	1773.89
						31874.2	22978.3			22978.3	1658.61
						17301.2	23653.1			23653.1	2001.12
						20377.3	30889.1			30889.1	769.567
						26873.8	30702.3			30702.3	824.897
						31605.6	30790.4			30790.4	3227.46
						30680.9	32758.4			32758.4	1828.59
						23902.6	23681.3			23681.3	2921.54
						21641.3	24024.2			24024.2	2569.2
						19892	28837.9			28837.9	1368.16
						24074	40004.1			40004.1	1493.08
						21664.4	31002.5			31002.5	3390.31
						19648.7	26487.6			26487.6	4398.48
						27802.8	28238.4			28238.4	1302.31
						22581.8	32667.9			32667.9	1432.72
						23192.1	26441.9			26441.9	2626.04
						23383.3	22510.7			22510.7	4578.21
						24998.4	26596.8			26596.8	1817
						18991.1	26082.3			26082.3	3310.96
						18233.9	26503.6			26503.6	2770.13
						19411.4	23468.5			23468.5	797.241
						31963	33032.1			33032.1	1869.29
						20928.4	22379.2			22379.2	2773.36
						22119.5	25770.8			25770.8	2337.48
						29640.5	36353.4			36353.4	2834.79
						26641.9	31251.7			31251.7	2311.17
						32999.7	30210.2			30210.2	4114.28
						31557.8	23455.6			23455.6	8013.71
						29119.6	36055			36055	2357.08
						27309	34785			34785	2591.76
						29104.2	26846.8			26846.8	1512.24
						30626	23921.1			23921.1	5792.4
						28830.9	27438.7			27438.7	3301.19
						33571.4	26612			26612	4051.27
						40384.9	27787.1			27787.1	5875.34
						25295.7	22488.7			22488.7	2677.9
						27281.6	13881.6			13881.6	12136.2
						21053	27264.3			27264.3	3500.79
						21069.9	19956.1			19956.1	2202.63
						28609.9	28164.4			28164.4	2104
						26883.7	15580.5			15580.5	9249.21
						26936.1	21838.9			21838.9	599.333
						21027.8	31435.7			31435.7	3167.14
						26090.2	26637.9			26637.9	1833.52
						25711.2	8887.86			8887.86	13533.6
						21403.9	20728.5			20728.5	5923.7
						22235.6	26185.7			26185.7	2946.83
						24219.9	18983.4			18983.4	2682.15
						28564.6	27741.1			27741.1	1921.26
						31527.4	24045.6			24045.6	2398.65
						26793.7	19539.4			19539.4	1555.23
						28867.8	18024.2			18024.2	1023.21
						21286.5	18800.3			18800.3	4167.93
						27866.1	32052.6			32052.6	2151.73
						4324.86	26505.3			26505.3	2394.71
						38483.5	25898.6			25898.6	1099.71
						25615.9	26878.2			26878.2	1816.38
						29381.1	33077.2			33077.2	1872.43
						31731.3	20796.1			20796.1	1524.93
						28933.6	27995.5			27995.5	993.379
						33158.3	25371.2			25371.2	2294.14
						32116.3	21056.5			21056.5	2652.07
						34717.4	23624.3			23624.3	3003.48
						23345.2	25542.2			25542.2	1643.29
						31259	21274.4			21274.4	1711.63
						43543.3	25900.1			25900.1	1702.3
						27910.1	23137.2			23137.2	3320.6
						32231.3	29019.6			29019.6	1130.67
						29599.3	17003.3			17003.3	1121.03
						25523.2	21277.9			21277.9	1457.78
						25783.6	24831.1			24831.1	749.321
						21000.4	20538.4			20538.4	1129.71
						26615.8	17450.1			17450.1	697.296
						23021.2	15638.4			15638.4	3000.07
						25690.6	26258			26258	2647.67
						37527.5	31105			31105	1949.1
						31699.2	24432.8			24432.8	1717.96
						34579.9	41707.9			41707.9	3792.52
						35026.2	25143.5			25143.5	3083.53
						33876.9	27655.8			27655.8	2766.3
						28789.1	25248.6			25248.6	4703.84
						40836.1	26476.2			26476.2	1948
						19368.9	22291.8			22291.8	1589.89
						33245	25211.1			25211.1	872.786
						17496.7	25323.8			25323.8	2991.11
						29513.9	25376.8			25376.8	1122.72
						29864.8	20444			20444	3564.85
						28145	20544.3			20544.3	1535.79
						38742.5	20781.1			20781.1	2070.43
						27701.5	24799.8			24799.8	2197.96
						30183.5	23662.7			23662.7	2078.83
						42215.5	22786.5			22786.5	1076.66
						31248	24403.1			24403.1	5952.52
						28667.9	30320.6			30320.6	5753.07
						65535	38943.6			38943.6	2000.75
						25273.1	32482.4			32482.4	3565.38
						30285.1	32056.7			32056.7	3040.46
						23205	37078.4			37078.4	1429.36
						31046	28203.7			28203.7	2587.77
						4645.93	29045.1			29045.1	3088.32
						23699.9	37212.3			37212.3	4933.41
						31310.8	25005			25005	3379.93
						25916.4	64344.1			64344.1	2427.44
						24607.3	38110.4			38110.4	1402.93
						32701	28957.9			28957.9	1413.07
						23210.1	28499.7			28499.7	1312.16
						32914.9	30185.4			30185.4	3526.22
						32829.7	30712.3			30712.3	1572.47
						19107.9	46306.2			46306.2	2931.66
						27585.3	25087			25087	1234.69
						27530.4	18880.3			18880.3	4791
						34395.8	23969.4			23969.4	2718.35
						27027.6	25362			25362	2482.83
						19064.8	25174.8			25174.8	1883.17
						23768.1	27831.5			27831.5	2069.03
						29056.5	32606.6			32606.6	3733.96
						23600.3	18991			18991	6155.82
						22647.8	22108.4			22108.4	1228.07
						23307.9	18189.9			18189.9	1850.07
						4871.86	32367.4			32367.4	1691.23
						18323.9	20272.8			20272.8	990.724
						19091.4	31955.6			31955.6	4021.57
						24195.8	22188.5			22188.5	2329.52
						19672.6	20040.4			20040.4	4983.03
						25991.3	31047.9			31047.9	1582.27
						25885.4	18953.9			18953.9	862.759
						23900.4	19542.4			19542.4	2019.17
						6295.58	19509			19509	3783.04
						18287.9	21004.2			21004.2	2282.24
						20131.4	21455			21455	1829.21
						18460.3	24270.6			24270.6	1219.37
						22429	26646.4			26646.4	2343.14
						30148.3	34867			34867	1304.46
						19050.7	30763.5			30763.5	1153.14
						19171.2	33208.2			33208.2	4928.69
						21931.4	31333.7			31333.7	1400.67
						19715.6	24444.9			24444.9	740.464
						25102.5	29628.7			29628.7	2992.69
						26725.2	33348.4			33348.4	4368.84
						21608.2	26130.9			26130.9	2780.1
						35215	29116.4			29116.4	1178.21
						26907.9	36303.6			36303.6	3368.48
						26878.8	28892.1			28892.1	2153.07
						30526.4	35192.7			35192.7	2093.5
						17808.6	29219			29219	2931.18
						24089.2	29610.5			29610.5	2717.52
						14331.9	27953.4			27953.4	1379.35
						4161.78	42844			42844	3550.1
						9546.81	22284.3			22284.3	5334.3
						29947.6	27537.9			27537.9	1901.83
						17238.5	23265.9			23265.9	3005.77
						44543.6	30279			30279	1568.43
						27978	17240.3			17240.3	10606
						34482.5	24201			24201	950.143
						28612.7	23712.8			23712.8	1799.41
						21248.2	25300.5			25300.5	4419.52
						26558.4	26521			26521	2267
						23656.3	19757.3			19757.3	3512.52
						21472.2	25567			25567	930.385
						33208.4	24329.6			24329.6	2704.93
						6135.9	22444.4			22444.4	5337
						20893.9	25564.9			25564.9	1451.69
						18318.3	19670.6			19670.6	1580.31
						24768.4	18615.8			18615.8	1920.91
						22682	22181.1			22181.1	1473.89
						21598.5	25603.2			25603.2	2080.62
						18267.9	23538.2			23538.2	1460.93
						22561.4	32146.3			32146.3	1762.07
						25107.9	29919.6			29919.6	2184.48
						25270.8	20395.2			20395.2	2572.48
						24365.3	22076.4			22076.4	2211.31
						8692.84	20130.4			20130.4	1846.96
						19341.4	21243.7			21243.7	1328.41
						20830.9	22492			22492	3468.1
						25561.3	33315.6			33315.6	1915.03
						19524.7	30358			30358	1253.17
						20826.1	33707.4			33707.4	2202.48
						27463.7	32976.7			32976.7	4207.86
						19500.9	25957.8			25957.8	954.931
						22259.9	25797.2			25797.2	3262.82
						20777.8	31415.5			31415.5	3322.32
						23523.5	29659.9			29659.9	1123.39
						24759.1	31026.9			31026.9	2283.34
						17748.2	27666.6			27666.6	1256.53
						3857.25	26781.7			26781.7	3079.5
						27152.3	23590.7			23590.7	1181.62
						13011.8	21053.4			21053.4	823.8
						10491.8	23937.1			23937.1	1229.45
						17125.2	27069.1			27069.1	2272.22
						26791	23670.1			23670.1	929.852
						21437.2	22780.7			22780.7	2917.9
						27118.1	25772			25772	3032.53
						5251.41	24341			24341	2635.54
						22108.8	33504.8			33504.8	1085.91
						4374.33	21743.2			21743.2	4243.03
						2701.18	21023.8			21023.8	1332.59
						23553.7	22716.7			22716.7	3452.63
						18808.1	23232.4			23232.4	1967.81
						29174.4	21202.5			21202.5	1602
						24630.2	18146.3			18146.3	3280.86
						15520.3	28956			28956	2786.3
						23861.3	31844.9			31844.9	1223.09
						24175.4	28412.7			28412.7	1844.14
						34204.3	20845.9			20845.9	2310.56
						17333.6	24935.8			24935.8	3346.5
						20630.6	26290.5			26290.5	1904.54
						28213.6	19051.8			19051.8	1400.28
						15356.5	16991.3			16991.3	3827.17
						25600.5	21770.8			21770.8	4688.96
						21751.5	20698.2			20698.2	4762.28
						21255.5	20545.7			20545.7	4301.76
						18272.7	17914.9			17914.9	3267.52
						23049.4	12835.7			12835.7	2246.28
						35804.6	12456.6			12456.6	1132.28
						28283.6	11477.5			11477.5	689
						24933.9	10499.3			10499.3	1896.35
						23522.4	11283.6			11283.6	1027.96
						37500.2	14639.9			14639.9	1680.63
						22201.3	14036			14036	1810.33
						42160.8	16316.1			16316.1	3746.89
						24727.2	14898.9			14898.9	1499.12
						24359.9	15393.6			15393.6	2239.57
						30604.8	11137.9			11137.9	716.793
						30010.7	12582.7			12582.7	1434.5
						26009.1	14858.6			14858.6	668
						19430.2	14681.5			14681.5	2244
						25915.6	14612.8			14612.8	800.065
						20695.4	18777.2			18777.2	713.345
						16558	16487.5			16487.5	827.429
						16674.3	10802.7			10802.7	7284.11
						18806.3	23536.4			23536.4	580.4
						16493	13210.8			13210.8	1457.13
						19177.1	18678.8			18678.8	1245.35
						19301	16580.8			16580.8	1027.33
						27458	17778.7			17778.7	2330.55
						20459.2	20757.5			20757.5	2461.55
						34885.7	17110.6			17110.6	1578.79
						29174	16787.7			16787.7	1685.83
						19510.7	15128.6			15128.6	2273.68
						29267.5	18152.3			18152.3	1585.83
						29824.3	15938			15938	1181.38
						23130.1	17257.2			17257.2	2445.83
						30353.2	17698.5			17698.5	4093.77
						27992.1	16097.4			16097.4	1979.8
						30039.7	14810.3			14810.3	1338.37
						33897.9	11216			11216	572.194
						31775.7	14084.6			14084.6	873.286
						26401.3	18588.8			18588.8	4427.9
						24361.3	17084.3			17084.3	718.414
						21479.4	22193.9			22193.9	1235.96
						18694.7	18035			18035	2635.24
						19230.1	15791.2			15791.2	3245.86
						20778.5	16532.3			16532.3	3214.86
						24164.9	19215.3			19215.3	2364.68
						15108.1	16199.5			16199.5	1075.27
						29390.9	14824.8			14824.8	3110.52
						17622.8	14652.7			14652.7	1847.39
						37464.7	23222.7			23222.7	1741.83
						34330.1	18086.4			18086.4	2094.43
						23648.3	19078.6			19078.6	3148.97
						25285.9	18401.7			18401.7	1336.21
						34296.6	16088.5			16088.5	1889.1
						31054.8	15309.2			15309.2	2060.31
						23781.6	14981.1			14981.1	3075.58
						26515	17424.8			17424.8	624.759
						22656.2	18537			18537	6051.82
						18813.8	20558.8			20558.8	614.679
						15212.8	27039.7			27039.7	2128.9
						19534.5	21423.3			21423.3	1012.77
						18304.8	20842.4			20842.4	2358.37
						5982.87	20069.5			20069.5	762.828
						25523	19853.2			19853.2	1847.41
						17855.6	16492.1			16492.1	2265.71
						25007.8	22797.5			22797.5	1176.28
						17062.3	20784.7			20784.7	1336.76
						16692.2	16306.4			16306.4	712.192
						19119.3	17056.6			17056.6	866.379
						18934.9	21472.4			21472.4	970.333
						20871.9	18363.6			18363.6	812.214
						19061.4	20458.3			20458.3	1754.76
						14433.3	17648.5			17648.5	1066.97
						10215.4	11771.3			11771.3	3664.14
						8675.46	30716.7			30716.7	2348.92
						10044.2	25215.6			25215.6	1460.93
						13877.2	26643.1			26643.1	1500.61
						12426.1	26632.1			26632.1	2413.74
						13548.5	24727.6			24727.6	2321.64
						12048.9	23265.9			23265.9	667.966
						9750	30517.3			30517.3	1913.07
						11347.1	37636.5			37636.5	839.172
						18034.1	26924.6			26924.6	1990.52
						10826.9	25215			25215	1047.82
						15552.9	27070.9			27070.9	2754.28
						18626.5	22792.2			22792.2	2622.07
						9462.48	24467.2			24467.2	1123.07
						16549	25663.7			25663.7	2536.85
						17586.1	23357.4			23357.4	2561.03
						14326.1	27578			27578	2900.62
						12063.6	19910.8			19910.8	1943.41
						12838	22912.7			22912.7	1459.52
						14118.3	18739.4			18739.4	568.966
						14735.2	25433.8			25433.8	2370.5
						9762	21473.8			21473.8	1212.65
						14448.4	19218.6			19218.6	1269.59
						14143.4	19118			19118	1802.7
						13289.2	39509.3			39509.3	1629.93
						14566	28871.4			28871.4	1659.69
						9435.62	23515.7			23515.7	1943.17
						16290.1	17721.5			17721.5	3213.1
						12886.6	22824.8			22824.8	5133.29
						12370.3	31419.9			31419.9	1692.62
						9702.07	18862			18862	957.077
						14819.1	22238.9			22238.9	5909.7
						21359.1	22713.3			22713.3	2855.82
						13491	23193.1			23193.1	3268.03
						15402.3	23294.1			23294.1	1915.76
						13841.6	21513.9			21513.9	658.292
						18006.7	14990.9			14990.9	3402.57
						17910.3	16725.9			16725.9	3327.6
						15828.8	25521.3			25521.3	2686.75
						14383.9	23336.1			23336.1	3382.46
						14913.1	17970.7			17970.7	1684.69
						16235.2	18209.5			18209.5	1768.16
						13411	34641.2			34641.2	2092.91
						12503.5	28283			28283	1392.41
						20143.4	29989.3			29989.3	913.033
						21260.8	28721.3			28721.3	1169.57
						13476.1	38612.1			38612.1	523.074
						15167.8	28067.4			28067.4	1574.18
						14567	27320.5			27320.5	1774.38
						16141.1	21444.1			21444.1	3620.8
						26913	25046			25046	3137.83
						21683.7	20936.1			20936.1	3986.86
						20103	23953.6			23953.6	3114.09
						17863	23456			23456	1802.66
						4142.24	22411.4			22411.4	2212.92
						13684	24800.7			24800.7	1478.69
						15075.1	27023.2			27023.2	1249.08
						17774.6	28458.3			28458.3	1332.37
						22984.7	27838			27838	6441.55
						19095.7	28825			28825	2348.5
						17490.2	21144.9			21144.9	4555.48
						23665.7	35425.7			35425.7	3409.2
						20830.9	21145.3			21145.3	940.567
						19211.6	22303.6			22303.6	1064.93
						21197	34977.8			34977.8	2501.58
						24004.7	25430.4			25430.4	1549.55
						15667.8	25933.8			25933.8	1699.96
						24672.9	32225.4			32225.4	1953.5
						22768.9	18975.4			18975.4	739.778
						15304.8	20818.4			20818.4	902.75
						17537.8	22190.7			22190.7	3338.67
						21716.4	22453.4			22453.4	2489.41
						20213.7	18784			18784	4517
						23344.5	27043.6			27043.6	2384.59
						12968.4	24154.7			24154.7	2252.87
						22242	18808.4			18808.4	1010.07
						22041.7	27874.4			27874.4	2520.3
						21102.3	32321.2			32321.2	1360.1
						29248.2	24611.1			24611.1	626.655
						25920.1	30960.7			30960.7	2193
						24193.7	27136.8			27136.8	2440.9
						26210	27776.2			27776.2	2907.23
						15936	25255.7			25255.7	817.655
						21198.8	21641.3			21641.3	3572.59
						19395.8	27187.3			27187.3	2240.79
						18535.1	25988			25988	2396.92
						23061.4	22965.3			22965.3	1310.17
						23233.2	21695.3			21695.3	1814.25
						17841.7	18100.3			18100.3	4125.03
						15618.2	20041.4			20041.4	1402.48
						5548.38	20485.7			20485.7	781.5
						18783.7	18281.9			18281.9	4269.73
						23910.2	17398.4			17398.4	4020.04
						21881.8	20200.3			20200.3	895.536
						26633.6	24297.7			24297.7	1536.31
						29507	31167.9			31167.9	3465.6
						16634.3	30576.9			30576.9	1684
						23721.9	34961.8			34961.8	4061.34
						27679.9	30258.9			30258.9	2525.72
						25349	31135.3			31135.3	2151.9
						25066.6	27082.9			27082.9	1416.85
						17602.9	19971.7			19971.7	2383.62
						28254.4	23826.7			23826.7	1468.57
						19592.3	24921.8			24921.8	1026.2
						22587	25353.6			25353.6	2348.85
						22865.2	20391.7			20391.7	2950.19
						20882.7	20233.9			20233.9	1877.88
						18316	30233.9			30233.9	1793.83
						18943.6	30333.1			30333.1	3062.7
						32040.8	21089.3			21089.3	1698
						24000.2	26150.7			26150.7	2252.68
						20348.5	22841.5			22841.5	2686.7
						34843.2	20015.5			20015.5	2227.73
						21892.4	6529.9			6529.9	7373.62
						18423.5	16488.5			16488.5	2724.39
						17977.3	17704.6			17704.6	1419.33
						21176	11164.1			11164.1	4918
						21242.8	14877.9			14877.9	1986.79
						24470.8	18149.2			18149.2	2172.34
						18337.9	20683.3			20683.3	2038
						10134.7	16976.9			16976.9	1154.75
						24031.1	15243.5			15243.5	3316.05
						21933.8	17069			17069	1040.73
						27417.2	17713.5			17713.5	1362.97
						5759.37	15106.7			15106.7	1993.73
						19148.2	18388.6			18388.6	2095.04
						26249.2	13692.6			13692.6	4165.3
						24842.6	19420.6			19420.6	1455.31
						19110	12566.6			12566.6	1013.18
						20440.7	16565.3			16565.3	1670.75
						25322.5	25802.9			25802.9	1638.63
						22521.3	14920.8			14920.8	1800.79
						18749.7	12930.3			12930.3	3207.28
						17032.5	22457.8			22457.8	3619.57
						21947.4	17597.5			17597.5	952.464
						20997.3	15701.4			15701.4	1626.67
						20348.6	15359.6			15359.6	768.586
						21808.6	18183.6			18183.6	1337.19
						18253.2	15878.3			15878.3	1360.11
						14306.3	14149.9			14149.9	2877.58
						25274.2	18136.9			18136.9	1566.15
						30321.8	16603.4			16603.4	1138.36
						18469.5	19841.3			19841.3	2132.31
						17723.3	16401			16401	1376.18
						21486.9	21053			21053	1816.3
						16222.6	21565			21565	1984
						18322.8	19518.1			19518.1	2132.23
						17774.7	22306.3			22306.3	3471.79
						28622.7	15636.1			15636.1	4561.07
						25666.9	18129.4			18129.4	2887.81
						23755.2	18115.6			18115.6	582.115
						22024.7	18553.3			18553.3	1748
						21214.4	16744.9			16744.9	2448.73
						21194.5	16824.8			16824.8	985.276
						23738.8	22303.6			22303.6	2525.86
						11786.9	16492.1			16492.1	697.852
						11220.1	18885.2			18885.2	1061.19
						7835.87	18060.2			18060.2	605.567
						12377.3	14868.3			14868.3	3081.04
						15579.4	22372.4			22372.4	1516.18
						11314.4	12629.4			12629.4	2974
						15308.2	19327			19327	1251.12
						14675.6	15843.3			15843.3	1298.2
						14850.1	18180.4			18180.4	827.478
						13151.6	15539.1			15539.1	1522.07
						12844.8	16044.6			16044.6	2773.76
						13660.4	13773.3			13773.3	4930.29
						13228.5	15831.3			15831.3	2920.86
						10863.1	17513.8			17513.8	3096.85
						16641.7	16397.6			16397.6	1608.36
						15573.7	14487.2			14487.2	5817.75
						14115	17243.8			17243.8	1052
						12538.3	15103.1			15103.1	836.31
						12049.5	13402.7			13402.7	2545.24
						13151.5	16113.6			16113.6	914.731
						12673.4	14850.3			14850.3	1184.55
						12237.6	16334.6			16334.6	2664.9
						14159.7	15049.7			15049.7	2051.58
						13882.2	17609			17609	1817.76
						11516.8	20332.8			20332.8	1945.86
						20321.1	23765.4			23765.4	1478.5
						16566.2	23248.2			23248.2	1318.68
						17198.4	19300.8			19300.8	2117.72
						5183.21	29838.6			29838.6	1052.86
						13041	16599.8			16599.8	2101.43
						14673.2	22431.7			22431.7	3317
						13721.7	15699.1			15699.1	1072.38
						15220.3	20052.5			20052.5	2469.04
						15401.9	17568.5			17568.5	1338.55
						12612.6	17487.1			17487.1	2969.26
						15980.9	17870.4			17870.4	1318.79
						14514.9	18183.2			18183.2	1662.81
						13662.9	15432.8			15432.8	990.897
						11911.9	21950.6			21950.6	1819.85
						15853.2	16832			16832	2579.23
						15786.7	15335.1			15335.1	1175.59
						21769	18977.1			18977.1	1102.61
						20370	19219.3			19219.3	921.414
						20015.2	17999.4			17999.4	1087.59
						18153.5	24080.3			24080.3	2014.64
						16041.7	19667.8			19667.8	2600.83
						18594.5	17190.6			17190.6	1736.71
						17112.7	19620.7			19620.7	3690.54
						22053.4	18874.5			18874.5	3044.5
						18665.8	11924			11924	6337.32
						16627.7	17299			17299	2463.57
						18603.2	19134.7			19134.7	1707.37
						19868.6	18240.5			18240.5	2498.13
						17216.2	16181.1			16181.1	2816.83
						17398.8	14530.2			14530.2	985.231
						20446.3	17607.1			17607.1	1562.1
						17906.9	16092.5			16092.5	1267.65
						17579.6	29938.3			29938.3	2918.69
						13830	20993.5			20993.5	1953.25
						18891.9	26001.9			26001.9	1395.52
						14361	23202.8			23202.8	4017.79
						16924.4	25287.9			25287.9	2137.07
						21546.8	22750.9			22750.9	1855.36
						19106.9	21283.8			21283.8	2118.53
						19571	22528.5			22528.5	1543.31
						21684.4	18079.9			18079.9	2462.54
						16751.5	17099.7			17099.7	696.31
						17560.3	20461.1			20461.1	1440.9
						18753.6	21844.4			21844.4	1815.1
						20452	21042.1			21042.1	1970.69
						16454	24576.8			24576.8	527.217
						20477.7	27008.6			27008.6	1109.68
						16499.6	19764.6			19764.6	2260.5
						22683.5	22830.5			22830.5	923.5
						19641.8	22920.5			22920.5	1275.57
						19173.3	17470.8			17470.8	2535.24
						22318.3	17384.1			17384.1	1952.54
						19898.3	23811.3			23811.3	958.962
						19064.7	19244.6			19244.6	1193.64
						19450.5	25983.6			25983.6	2736.04
						15289.5	15265.8			15265.8	2265.23
						17144.2	23563.6			23563.6	1679.59
						17077.4	18951.6			18951.6	1035.67
						14725.1	19413.9			19413.9	1321.73
						17973.2	17853			17853	2469.1
						17318.1	14531.9			14531.9	1783.24
						15342.8	19255.8			19255.8	3391.66
						14889.5	23150.6			23150.6	1657.54
						16558.8	20535.6			20535.6	1915.72
						14594.8	16827.9			16827.9	1623.32
						16305.6	20408.1			20408.1	772.952
						14338.8	17982.7			17982.7	2102.77
						22326.6	12726.5			12726.5	1928.06
						27070.2	16630.5			16630.5	1296.22
						17153.9	22848.5			22848.5	1984.68
						17641.9	27164.9			27164.9	2152.75
						23098	23133.3			23133.3	1335.93
						18129.1	21193.4			21193.4	1573.52
						21568.4	23137.1			23137.1	1386.59
						16195.6	33706.2			33706.2	2650.32
						18275.5	27268.2			27268.2	1229.68
						22567.8	21816.5			21816.5	2225.41
						17587.3	21105			21105	3462.37
						24579.4	17628.7			17628.7	742.133
						31226.2	21421.9			21421.9	1819.62
						23974.1	22072.7			22072.7	2472.74
						18163.7	24375			24375	3193.34
						28268.2	20352.4			20352.4	3348.79
						29480.8	23382.3			23382.3	1930.55
						19718.1	19842.8			19842.8	621.222
						17699.6	27943.1			27943.1	2779.82
						20353.3	19555.3			19555.3	1370.83
						20020.3	22434.6			22434.6	1754.21
						5310.13	19496.3			19496.3	599.333
						21393.6	17367.4			17367.4	1382.26
						22641.8	16936.9			16936.9	1874.76
						23170.2	27384.2			27384.2	937.346
						17747	26218.8			26218.8	1374.53
						18437.1	22442.5			22442.5	1468.07
						18663.7	23363.6			23363.6	1712.58
						17355.7	23980			23980	2742
						18923.4	25658.5			25658.5	2367.79
						16277.3	25111.7			25111.7	3408.04
						20136.8	25384			25384	2229.72
						21990.5	20420.4			20420.4	1700.17
						18276.2	19216.1			19216.1	3057.23
						18153.4	22286			22286	1844.32
						17495.9	16268			16268	2022.62
						17716	22484.6			22484.6	642.931
						25723.1	22067.6			22067.6	973.964
						18577.6	16740.6			16740.6	3202.82
						15858.8	20515.2			20515.2	1749.22
						18893.9	20940.8			20940.8	764.931
						11079.1	23055.9			23055.9	2155.54
						19118.1	20991.6			20991.6	1515.07
						16473.7	20133.1			20133.1	1293.77
						23222.3	18719.9			18719.9	2769.97
						21619.2	16811.4			16811.4	803.714
						18939.5	23853.4			23853.4	997.63
						21649.3	20031.5			20031.5	1912.3
						19828	23075.4			23075.4	2332.73
						17893.2	21842.7			21842.7	3536.45
						2719.12	23405.2			23405.2	1736.48
						11439.5	22972			22972	963.828
						6859.92	16321.5			16321.5	2891.14
						18287	23134.8			23134.8	3396.57
						14954.2	23923.6			23923.6	2088.91
						7752.21	23540.4			23540.4	917.071
						5037.21	20675.9			20675.9	2109.27
						7037.17	19602.8			19602.8	1650.72
						11569.8	29449.2			29449.2	4834
						10329.3	20683.9			20683.9	1648.58
						7471.56	25294.5			25294.5	1159.96
						16646.8	24029.6			24029.6	791.5
						16208.2	42097.8			42097.8	1968.76
						18655.3	63505.5			63505.5	3956.62
						19340	17814.2			17814.2	1553.37
						15967.9	12899.1			12899.1	4727.22
						11404.8	17209.6			17209.6	2519.21
						22197.9	13202.7			13202.7	7350.93
						20254.7	28816.9			28816.9	3750.55
						14058.3	17987			17987	1512.79
						16430.4	17225.2			17225.2	1095.86
						13017.6	20165.8			20165.8	1045.18
						17351.4	21460.6			21460.6	1510
						16135.9	18268.4			18268.4	2213.67
						15298.3	19259.6			19259.6	2048.37
						15770.8	23095.8			23095.8	565.148
						18441.2	24631.1			24631.1	2524.41
						22780.4	18117.2			18117.2	694.552
						23836.3	22254.3			22254.3	756.103
						19263.7	23483.5			23483.5	774.769
						21368.8	24379.5			24379.5	2054.04
						20506	16457.1			16457.1	1297.81
						17619.5	13357.3			13357.3	2596.8
						20128.9	26173			26173	2486.59
						17021.9	26796.9			26796.9	1738.57
						21977.7	19280.6			19280.6	1453.04
						22772.5	12191.2			12191.2	536.893
						15640	15625.2			15625.2	2107.48
						19482.3	28023.3			28023.3	594.759
						23437	16884.8			16884.8	2300.41
						18417.1	22994.9			22994.9	875
						18771	16328.4			16328.4	1177.46
						14038	16671.8			16671.8	1212.57
						15968.9	20610.6			20610.6	2321.25
						13747.5	19139.3			19139.3	2799.4
						24656.6	18907.2			18907.2	1211.33
						26027	21694			21694	1726.76
						17475.3	20215.3			20215.3	2879.96
						24716.3	18065.7			18065.7	1512
						18615.6	18726.2			18726.2	1037.83
						24589.8	24179.9			24179.9	1359.67
						22796.4	19198.3			19198.3	1664.67
						28165	17525			17525	785.241
						28359	20358			20358	1360.93
						16819	16419.8			16419.8	2336.14
						18250.9	14825			14825	4178.66
						23047	13897.9			13897.9	1863.68
						16916.4	22099.7			22099.7	787.885
						28381.3	22884.4			22884.4	1270.38
						19280.7	30351.1			30351.1	2050.21
						20468.4	23019.6			23019.6	2170.68
						18598.6	18475.3			18475.3	3490.86
						18559.3	22243			22243	2441
						20927.5	26105.3			26105.3	2347.67
						27294.3	17451.2			17451.2	1110.33
						25150.8	22390.7			22390.7	2516.48
						25580.7	19848.5			19848.5	754.448
						23325.6	20051.4			20051.4	2514.71
						18793.6	21275.5			21275.5	1697.65
						24967	21700.5			21700.5	1357.64
						26856.8	20854.7			20854.7	2531.25
						18669.5	18331.9			18331.9	2344
						17052	24435.7			24435.7	1704.83
						24988.5	16614.3			16614.3	1683.63
						23400.1	16457.5			16457.5	1377.23
						15524.4	17857.5			17857.5	982.724
						18896.6	21897.8			21897.8	1066.9
						17824.2	19756.3			19756.3	4327.28
						23998.6	24859.8			24859.8	1588.66
						17988.6	26739.8			26739.8	2897.57
						17660	25059.3			25059.3	1015
						17932.1	22642.3			22642.3	4176.46
						20466.2	24026.8			24026.8	1756.07
						21597.4	29386.5			29386.5	2628.47
						14971.9	27800.6			27800.6	3764.34
						19462.9	26186.8			26186.8	1280.59
						19562.2	31971.8			31971.8	2091.71
						19496.7	21097			21097	2927.86
						17424.3	29441.4			29441.4	2271.07
						14876.2	20315.2			20315.2	1823.21
						14742.6	20847			20847	2502.54
						25124.7	21525.1			21525.1	1955.07
						22971.9	12179.3			12179.3	3681.67
						24302.4	19539.2			19539.2	2627.66
						19927.3	20424.3			20424.3	1890.57
						22799.5	24307			24307	1336.26
						21814.5	19043.3			19043.3	1049.41
						33384.9	18433.8			18433.8	2561.63
						18762.4	20195.7			20195.7	2352.69
						27548.7	18922.4			18922.4	1056.67
						17449.5	22386.6			22386.6	1395.42
						23825.9	23051.2			23051.2	970.483
						20288.8	17834.4			17834.4	2877.7
						26747.3	23121.1			23121.1	1171.55
						21729.4	18464.8			18464.8	1854.62
						16650.9	17024.4			17024.4	1125.17
						19998.4	23626.1			23626.1	923.167
						14129.4	23549.7			23549.7	1175.61
						18890.6	22347.3			22347.3	1623.08
						21546	26611.3			26611.3	2690.79
						32276.4	25720.3			25720.3	1828.4
						23691.4	19726.8			19726.8	1903.61
						25942.2	23292.4			23292.4	1564.52
						20687.4	24921			24921	2260.56
						17446.8	23442.9			23442.9	1788.9
						18379.4	20923.7			20923.7	1489.65
						16373.5	24019.7			24019.7	3635.2
						21726.2	31679.5			31679.5	1929.31
						18781.3	18133.8			18133.8	2920.28
						13308.3	21363.5			21363.5	1994.1
						29833	28657			28657	2827.5
						18316.9	17846.3			17846.3	819.167
						65535	19234.9			19234.9	1767.86
						16407	27118.2			27118.2	2482.42
						19679.6	17374.9			17374.9	1777.75
						18764.4	26238.7			26238.7	3047.27
						19865.8	25435			25435	2567.73
						19628.9	19229.8			19229.8	1953.16
						15787.7	34654.1			34654.1	2622.39
						18918.3	26105.6			26105.6	3079.61
						17530	24679.8			24679.8	1572.43
						15850.3	21190.8			21190.8	2606.45
						27126.7	26731.2			26731.2	1848.25
						23376.9	24641.6			24641.6	1713.04
						24110.6	21291.3			21291.3	3188.79
						22409.9	18856.9			18856.9	3246.35
						25765.2	23094.2			23094.2	1187.11
						20787.2	23002.9			23002.9	4800.42
						21079.6	23612.8			23612.8	2987.26
						26193.1	22809.3			22809.3	1022.33
						17095.1	25768.1			25768.1	1921.11
						17301.8	29930.1			29930.1	754.6
						19300.7	18067.2			18067.2	1373.93
						22465.8	16831.2			16831.2	3280.41
						22573.5	18674.5			18674.5	754.71
						17597.8	23030.6			23030.6	2560.79
						20621.9	21126.7			21126.7	988.571
						19243	21681.8			21681.8	2567.97
						19152.6	20838.2			20838.2	1547.43
						16729.5	21394			21394	1682.66
						18655	17244			17244	1052.57
						16807.1	18478.2			18478.2	1383.69
						11659.9	18327.7			18327.7	1684.83
						16894.8	17418.1			17418.1	660.37
						19159	20425.2			20425.2	2240.07
						22251.1	15337.8			15337.8	1427.93
						21443.1	18039.5			18039.5	2557.69
						14328	21412.8			21412.8	2104.71
						7508.25	16844.1			16844.1	1431.04
						17921.8	22735.4			22735.4	766.179
						13542.8	25704.4			25704.4	3022
						18515.8	19438			19438	2437.64
						9440.1	24581.3			24581.3	885.7
						14648.7	24110.4			24110.4	1285.03
						17457.3	23000.2			23000.2	1409
						16622.2	15536			15536	4502.93
						21817.5	11559.3			11559.3	8233.3
						14707.7	47350.1			47350.1	1161.76
						21014.6	22354.4			22354.4	2243.48
						15188.8	23712.7			23712.7	1671.19
						26027.8	35937.2			35937.2	2629.62
						22910.4	21769.7			21769.7	1405.41
						17918.6	24244.9			24244.9	815.552
						14687.3	23433.2			23433.2	1223.89
						20241.4	18537.5			18537.5	877.429
						17869.3	27940.3			27940.3	3683.03
						16940.3	23237.9			23237.9	3584.07
						21355.8	24331.1			24331.1	1858.58
						17750.8	20155.8			20155.8	1255.93
						25217.5	23558.6			23558.6	1393.78
						21818.4	65535			65535	7755.43
						25651.8	25231.4			25231.4	1379.24
						25074.7	24031			24031	1277.66
						23709.8	43947.4			43947.4	1203.1
						19391.3	30643.9			30643.9	1510.62
						22982.7	19591.6			19591.6	1300.76
						19733.6	20281.9			20281.9	2362.72
						27194	18234.7			18234.7	1765.97
						19157.4	17656			17656	1371.21
						15652.9	24556.2			24556.2	1883.73
						19110.8	20706			20706	723.233
						17036.5	18158.9			18158.9	2710.1
						22153.5	20737.7			20737.7	1788.2
						18449	20949.8			20949.8	995.52
						16515.9	16725.2			16725.2	1023.27
						10647.6	21489.2			21489.2	1771.27
						19020.1	35862.8			35862.8	1536.71
						15092.5	17924			17924	961.034
						6457.41	15986.6			15986.6	1339.46
						15779.6	27674.9			27674.9	3217.72
						12606.2	19199.5			19199.5	4269.64
						12445.2	17778.7			17778.7	3205.4
						10685.8	12852.3			12852.3	2514.24
						13503.9	23635.5			23635.5	1257.4
						8630	21539.8			21539.8	1161.42
						2661.72	17396			17396	893.655
						7325.38	20612			20612	1535.8
						9600.7	21677.6			21677.6	2557.63
						11427.4	20094.5			20094.5	2892.27
						3216.81	22606.4			22606.4	2265.77
						2599.41	23403.7			23403.7	1855.91
						2561.75	26340.3			26340.3	1607.52
						3616.4	33975			33975	2355.12
						20074.7	23002.8			23002.8	893.542
						4270.31	20274.8			20274.8	2459.17
						4628.86	21793.9			21793.9	2027.9
						7241.36	20961.5			20961.5	1889.8
						27258.9	31661.5			31661.5	4148.46
						25569.6	19722			19722	2241.1
						20280.2	22558.3			22558.3	1442.96
						5338.76	19054.9			19054.9	1564.33
						16757.3	18790.4			18790.4	1893.53
						9288.39	18070.3			18070.3	1086.56
						14346.3	23049.7			23049.7	1597.81
						5987.93	17557.3			17557.3	2902.22
						13386.5	21319.6			21319.6	1251.57
						21535.7	26097.5			26097.5	2061.34
						20581.8	17384.9			17384.9	1787.34
						18058.5	20987.3			20987.3	3452.92
						33467.5	21043.1			21043.1	1185.26
						17922.8	17745.8			17745.8	1109
						15691.1	16151.4			16151.4	2349.37
						17549.7	20193.1			20193.1	1029.29
						21354.9	16027.7			16027.7	3311.14
						17629.3	19365.7			19365.7	1791.15
						14087	18547.1			18547.1	3111.25
						17823.6	19631.2			19631.2	2116.38
						15689.9	16421.9			16421.9	2085.13
						15285.4	21549			21549	2828.41
						16135.3	28524.8			28524.8	1022.9
						11519	16845.3			16845.3	1634.81
						17433.3	15431.1			15431.1	1047.25
						18598.5	19992			19992	1597.31
						19736	22976.8			22976.8	1094.27
						14587.1	18439.6			18439.6	3687.5
						13048.6	19925.4			19925.4	737.8
						13506.6	13663.5			13663.5	2306.63
						13907.2	9341			9341	5769.37
						18492.9	34318.8			34318.8	3414.32
						12105.6	20665.7			20665.7	1118.97
						14818.9	21167			21167	1590.43
						13757.2	24564.5			24564.5	1472.11
						6358.07	20363.5			20363.5	3136.3
						10038.4	24691.8			24691.8	1675.92
						13313.9	18923.1			18923.1	625.862
						14647.3	20688.8			20688.8	3801.11
						9743.07	11975.1			11975.1	9483.07
						11381.1	22124			22124	1751.97
						13113.6	23751			23751	3713.63
						11945.7	25542.4			25542.4	3858.68
						5158.34	22011.1			22011.1	2011.37
						6403.79	18606.5			18606.5	1843.31
						8696.34	21354.3			21354.3	1419.48
						10845.4	8942.65			8942.65	5456.61
						9708.48	16462.6			16462.6	1828.86
						9088.54	6998			6998	2458.36
						8998.38	14080.8			14080.8	2638.52
						9642.63	21747			21747	3061.86
						8370.04	20369.7			20369.7	2278.93
						8317.97	22355			22355	1074.47
						3829.14	20330.8			20330.8	2783.03
						2808.88	18622.7			18622.7	2229.86
						9073.83	17499.6			17499.6	3191.39
						6414.04	19652.4			19652.4	2515.43
						3576.63	18403			18403	1615.24
						6316.29	17421.4			17421.4	2278.36
						9219.45	16489.9			16489.9	1165.13
						4188.97	14277.3			14277.3	3906.43
						16256.5	15125.4			15125.4	823.148
						4863.73	14864.6			14864.6	3196.29
						3143.17	16991.9			16991.9	1846.88
						4171.1	13573.9			13573.9	3967.08
						16961.3	21767.6			21767.6	563.069
						14192	26132.1			26132.1	3557.72
						4044.39	24634.7			24634.7	3684.76
						18077.8	19376.2			19376.2	2372.17
						18841.7	22637.4			22637.4	3168.56
						18531	20320.1			20320.1	1102.43
						15567.5	21924.4			21924.4	1883.79
						18009.7	20381.7			20381.7	727.593
						17643.1	20174.9			20174.9	1829.7
						15745.5	18841.9			18841.9	1688.32
						16072.1	20760			20760	1245.79
						18163.8	18830.5			18830.5	2022.36
						28222.5	14544.7			14544.7	3137.07
						17350.7	20953.6			20953.6	2142.38
						15019.9	17378.6			17378.6	2697.9
						16583.1	18710.1			18710.1	2152.84
						19505.1	19466.4			19466.4	1598.76
						15824.3	18161.2			18161.2	2508.92
						17076.4	19611.7			19611.7	1583.79
						19155.9	19362.8			19362.8	1782.41
						19792.1	17283.9			17283.9	1005.62
						14871.4	15619.6			15619.6	1166.39
						16362.3	25322.6			25322.6	4250.73
						17106.8	21649.4			21649.4	2163.03
						17636.1	25260.9			25260.9	864.536
						15934.5	19795.1			19795.1	3747.87
						13265.3	17466.6			17466.6	1083.82
						20052.4	26027.5			26027.5	2682.77
						19291.9	20678.1			20678.1	1453.76
						17657.1	24615.6			24615.6	3452.94
						6087.52	10360.2			10360.2	12033.9
						16205.8	14918.8			14918.8	5353.97
						19089.6	22470.6			22470.6	2245.52
						17071.8	21689.8			21689.8	2498.69
						17525.8	17247.6			17247.6	2002.22
						17538.5	18492.1			18492.1	1765.79
						12209.9	20045.8			20045.8	2278.76
						20013.2	18041.3			18041.3	1618.29
						19120.8	17934.3			17934.3	4577.25
						16254.8	16310			16310	1279.79
						18720.6	20624.9			20624.9	2563.81
						21064.5	6272.27			6272.27	7676.47
						17507.6	4082.53			4082.53	14440.7
						15610.7	17408.1			17408.1	4252.38
						16394.1	19718.3			19718.3	5505.28
						17621.6	17002.6			17002.6	3476.56
						18125.3	17412.6			17412.6	1818.93
						17789.1	17657.1			17657.1	4848.36
						25081	18443			18443	1405.24
						20377.2	17469.9			17469.9	4455.76
						15792.8	14355.4			14355.4	3716.45
						16173.4	20106.2			20106.2	1846.2
						16208.1	14371.8			14371.8	1410.71
						17861	13106.8			13106.8	2641.74
						16926.4	12251.2			12251.2	2724.9
						12885.5	10726.1			10726.1	2015.6
						21715.3	11040.7			11040.7	1889.42
						23038.7	13497.3			13497.3	709.792
						15753.9	11587			11587	781.033
						19281.1	9747.55			9747.55	1754.48
						19560.4	9972.07			9972.07	1103.48
						21323.5	9260.96			9260.96	986.192
						18615.7	11144.3			11144.3	982.655
						18220.3	8323.27			8323.27	783.423
						20603.2	10661			10661	1410.17
						21054.5	9411.74			9411.74	633.778
						18543	20946.7			20946.7	1447.76
						18373.1	8299.7			8299.7	1086.85
						17491.1	8048.46			8048.46	1238.71
						26894.5	10034.3			10034.3	1255.36
						16211.8	12833.1			12833.1	1368.53
						18284.1	10306			10306	1283.43
						17031.7	13768.4			13768.4	2208.14
						24194.1	10427			10427	1860.96
						13751.9	11712.3			11712.3	929.276
						17278.1	8227.07			8227.07	1974.07
						17464.6	13226.2			13226.2	1404.62
						19465.2	11114.6			11114.6	1350.79
						17672.7	31995.5			31995.5	2337.19
						15525.5	14224.4			14224.4	1268.21
						16868.2	17038.1			17038.1	2568.79
						16382.8	35430.5			35430.5	1630.15
						16037.7	15248.4			15248.4	1454.67
						15114.1	16022.1			16022.1	4171.54
						15840.1	13465.9			13465.9	852.346
						18919.1	37981.5			37981.5	1209.93
						23065.5	13831.4			13831.4	2697.21
						16416	14194			14194	1256.21
						16912.8	11994			11994	1685.93
						16441.3	25005.2			25005.2	2308.42
						12393.4	15674.4			15674.4	2794.17
						20643.1	18122.3			18122.3	2993.1
						14648.2	20920			20920	921.935
						14146.2	16114.7			16114.7	1488.65
						15486	19027.1			19027.1	1102.83
						16139	18320.1			18320.1	2753.34
						11924.6	18424.1			18424.1	1087.24
						20081.3	20299.7			20299.7	742.345
						13287.6	13304			13304	1667.55
						18355.1	19374.6			19374.6	1828.57
						10014.9	15468			15468	1554.2
						17680.8	17917.5			17917.5	1473.41
						7451.71	14548.3			14548.3	1351.21
						7534.39	17208.2			17208.2	976.964
						7367.62	17508.2			17508.2	5348.52
						10562.4	22117.7			22117.7	1462.11
						9796.41	15062			15062	3340.87
						13226.8	15964.5			15964.5	1931.07
						12427.9	13126.4			13126.4	845.179
						10598	12657.2			12657.2	1097.21
						10761	12664.9			12664.9	1243.48
						9512.3	15165.6			15165.6	2144.14
						11697.6	15010.7			15010.7	1492.71
						10437.5	16941.4			16941.4	2013.45
						12144.3	42781.5			42781.5	5834.3
						12419.8	16271.6			16271.6	2219.86
						12793.5	13307.3			13307.3	1726.34
						5362	28563.2			28563.2	3208.8
						8027.1	25677.5			25677.5	1532.43
						6216.41	20689.8			20689.8	2984.45
						14337.3	21450.6			21450.6	1160.89
						5584.97	18998			18998	4595.92
						7231.27	16771.2			16771.2	2747.72
						14811	16294.1			16294.1	3632.54
						11402.3	16200			16200	3933.38
						11890.3	18394.7			18394.7	1232.08
						5083.83	14165.4			14165.4	1514.62
						13751.2	16041.4			16041.4	2135.96
						11566.1	14548.6			14548.6	3124.28
						15267.5	16554			16554	1518.56
						11554.1	17588			17588	2031.28
						13589.2	18053.8			18053.8	1823.96
						9206.73	15317.8			15317.8	4137.38
						11958.6	15397.3			15397.3	1610.46
						10320.5	14434.8			14434.8	2793.68
						10259.4	14328.6			14328.6	684.034
						12199.8	43493.4			43493.4	2015.03
						12484.8	16587.6			16587.6	1988.46
						11198.4	15909.3			15909.3	1250.58
						11706.9	17975.3			17975.3	2116.52
						8948.38	15231.8			15231.8	2731.85
						9250.03	36967			36967	2988.04
						9759.07	14776.1			14776.1	3261.52
						13317.7	13465.4			13465.4	2492.47
						9343.34	19055.6			19055.6	1456.17
						13395.4	16401.5			16401.5	1352.9
						13429.7	19628.5			19628.5	2692.1
						15202.4	19184.7			19184.7	1205.47
						9727.69	16990.7			16990.7	2154.09
						9606.54	14649			14649	2346.21
						10569.7	12873.2			12873.2	4145.57
						15004.8	21195.5			21195.5	1702.17
						16666.6	18871.5			18871.5	3335.93
						11827.5	19844.8			19844.8	4199.93
						14408.8	28336.4			28336.4	2996.46
						9445.93	19929			19929	2828.92
						10350.5	19958			19958	806.172
						10655.1	21200.6			21200.6	1554.63
						15783	17081.2			17081.2	1542.46
						10021.5	14654.9			14654.9	3502.59
						12247.7	21587.4			21587.4	3489.62
						8001.86	21508.9			21508.9	2421.79
						11678.7	20401.8			20401.8	1953.11
						9379.32	18274.8			18274.8	2313.07
						4684.77	19987			19987	2485.54
						13995.8	13788.4			13788.4	5398.83
						12094.3	28101.8			28101.8	3233.79
						14168	18792.8			18792.8	2977.64
						15064.2	15632.9			15632.9	1843.81
						12115.9	16441.4			16441.4	1940.45
						7243	18345.9			18345.9	2551.26
						18530.1	18063.2			18063.2	949.133
						11132.7	15636.5			15636.5	773.172
						19173.6	19122.4			19122.4	3908.14
						14752.1	15299.9			15299.9	1035.97
						15730.9	20827.1			20827.1	4186.75
						12237.2	23349			23349	1992.75
						11987.8	15682.6			15682.6	1557.71
						21278.1	15816.6			15816.6	1512.18
						15079.8	18029.8			18029.8	3155.34
						12585.5	16108.6			16108.6	831.385
						19610.9	13692.1			13692.1	959.655
						11566.3	15208.1			15208.1	1296.28
						12543	49713.8			49713.8	7423.62
						18212.4	16724.7			16724.7	1523.35
						14928.5	17543.5			17543.5	1057.3
						15209.8	17049.7			17049.7	1510.77
						12761.6	13018.1			13018.1	4199.2
						14429.7	10864.3			10864.3	2108.83
						13524.7	14621.8			14621.8	2409.54
						13467	19496.4			19496.4	1366.52
						14546.7	12264.5			12264.5	4354.65
						13989.8	10995.4			10995.4	9538.38
						12314.6	20171.9			20171.9	1032.29
						5149.32	21992.6			21992.6	5926.4
						12444.4	16169.4			16169.4	962.464
						10326.6	17332			17332	1564.72
						11945.2	20528.6			20528.6	1400.38
						11911.1	18929.6			18929.6	4991
						12259	16796.8			16796.8	2901.23
						9480.87	19073.6			19073.6	4416.56
						6083.04	18843.2			18843.2	1707.48
						10164.9	17397.3			17397.3	991.296
						15330.9	17372.4			17372.4	7255.32
						7911.41	16567.3			16567.3	1770.61
						7651.48	19668.6			19668.6	572.958
						16447.3	24888.1			24888.1	3781.39
						18528.5	17958.3			17958.3	1569.61
						19398.3	20073.6			20073.6	2461.29
						14993.7	15602.1			15602.1	973
						15840.5	17033.9			17033.9	2297.17
						18373.3	17213.8			17213.8	1544.11
						18723.3	19843.4			19843.4	2422.13
						13751.9	17786.7			17786.7	3004.37
						15994.9	18662.1			18662.1	3713.08
						17671	19645.7			19645.7	1560.87
						16683.7	16600.9			16600.9	1228.33
						13037.8	18228.7			18228.7	4107.58
						13079.6	18026.7			18026.7	1903
						11550	18999.3			18999.3	1153.79
						11668.2	17895.6			17895.6	1915.43
						16341.9	21862.9			21862.9	2710.54
						18638.1	23107.6			23107.6	2361.86
						21754.3	31986.5			31986.5	1986.55
						23978.9	18941			18941	1355.93
						17424.9	17873.6			17873.6	1385
						16596.8	16287.5			16287.5	1682.13
						13680.8	20689			20689	2301.21
						13076.7	17278			17278	5605.74
						13410.7	19700.9			19700.9	2156.72
						14471.6	17832.1			17832.1	1334.15
						14649.7	18300.5			18300.5	666.913
						2683.9	17171			17171	937.194
						10420.5	17395.1			17395.1	785.88
						17282.1	12299.2			12299.2	1876.59
						20500.9	17387.9			17387.9	2251.21
						5932.9	24925.2			24925.2	2075.04
						15389.7	26397.7			26397.7	2577.14
						15462.7	20741.2			20741.2	795.75
						15305.1	18289.9			18289.9	2639.64
						13349.7	17565.4			17565.4	4413.22
						12630.8	15806.1			15806.1	2451.63
						16615.8	12465.7			12465.7	5633.81
						15435.1	12036.6			12036.6	763.5
						15936.4	10904.7			10904.7	1097.9
						17124.7	10590.9			10590.9	1696.79
						17379.2	14144.6			14144.6	1535.91
						18417	11592.8			11592.8	1646.31
						9889.21	10895.4			10895.4	1759.33
						18128	11656.1			11656.1	511.231
						15255.4	10976.9			10976.9	1687
						17300	11754.7			11754.7	2439.72
						16402	11713			11713	893.448
						19257.8	15779.3			15779.3	1247.28
						21273.9	4524.78			4524.78	5816.78
						21683.3	9657.74			9657.74	2731.55
						17552.7	10190.9			10190.9	1661.21
						15289.4	8327.14			8327.14	2330.03
						17795.8	9600.68			9600.68	950
						22979.1	11233.1			11233.1	1308.96
						15114.6	11774.3			11774.3	1821.1
						10761.5	14631.2			14631.2	1418.21
						4811	12894.3			12894.3	1745
						16589.5	16086.4			16086.4	1092.72
						10380.7	11816.9			11816.9	1877.17
						11217	15375.2			15375.2	1558.21
						12334.3	10625.4			10625.4	1800.76
						7009	9995.18			9995.18	1354
						15030.6	11361.4			11361.4	902.267
						15852.8	11812			11812	923.778
						12768.4	16254.2			16254.2	1975.28
						16901.2	13507.3			13507.3	897.034
						11235.9	14070.7			14070.7	1357.29
						13869.9	10698.8			10698.8	942.393
						19592.7	11948.4			11948.4	2794.23
						10026.2	14106.4			14106.4	864.862
						14936.9	10635.3			10635.3	1484.27
						11251.5	10493.7			10493.7	2838.45
						10311.4	9423.03			9423.03	989.533
						17856.7	17242.1			17242.1	1863.68
						15079.8	10053.5			10053.5	1249.73
						17240.5	11178.3			11178.3	871.16
						15016.8	8651.87			8651.87	1213.61
						16992.3	8524.55			8524.55	1788.97
						20206.8	17812.3			17812.3	3123.39
						12659.2	24734			24734	3567.13
						15295	15559.6			15559.6	2505.29
						15477.4	14095.3			14095.3	2160.59
						11304.5	11006.5			11006.5	2062.65
						11805.8	14200.6			14200.6	667.613
						12902.4	16707.6			16707.6	1161.97
						14281.3	11051.8			11051.8	1268.93
						11376	14269.5			14269.5	2625.38
						14002.5	15461.4			15461.4	3500.82
						13923	10369.7			10369.7	2402.86
						12697.6	11759			11759	1049.76
						12008.8	10510.3			10510.3	1801.13
						11623.9	14169.6			14169.6	797.125
						11779.1	14292.3			14292.3	2032.41
						14320.7	12727.1			12727.1	1667.79
						19852.1	12656.6			12656.6	3964.11
						13861.8	13736.4			13736.4	1797.32
						14252.5	11477.6			11477.6	2984.97
						7701.96	12712.2			12712.2	1991.28
						15902.3	14757.4			14757.4	2412.48
						14503.9	9461.07			9461.07	1194.79
						9651.86	10723.5			10723.5	1183.25
						15788.3	9734.76			9734.76	1181
						11396.5	16835.2			16835.2	2450.57
						11312.3	9632.96			9632.96	944.5
						15016.9	16122.6			16122.6	2581.55
						16399.9	18872.1			18872.1	1874.83
						17123.6	12909.3			12909.3	2540.89
						14683.3	18478.5			18478.5	1897
						13142	14515.4			14515.4	981.3
						16697.2	14076.6			14076.6	3446
						10829	10065.3			10065.3	7208.62
						13615.8	16166			16166	3642.34
						7410.97	14548.3			14548.3	3644
						10592.8	13352.7			13352.7	901.031
						13360.4	12472.7			12472.7	1617.5
						16015.8	12785.3			12785.3	1557.5
						17876.2	14990.1			14990.1	869.5
						15499.3	11578.2			11578.2	1311.38
						25546.9	13034.8			13034.8	894.207
						14999.2	13490.3			13490.3	1373.46
						12528.4	10896.6			10896.6	2171.38
						14428	12792			12792	1527.77
						15215	12421.6			12421.6	1906.86
						16770.5	11141.7			11141.7	2314.67
						15111.6	9705.22			9705.22	4128.96
						10995.6	13420.2			13420.2	1193.44
						10530.1	10410.5			10410.5	1655.92
						22047.9	9501.72			9501.72	1631.52
						16718.6	19311.4			19311.4	2326.33
						15922.8	13868.4			13868.4	3278.44
						15149.2	16197.3			16197.3	1491.48
						17145	13329.1			13329.1	1598.52
						15956.6	17652.7			17652.7	1213.69
						17301.6	13118.1			13118.1	4605.57
						19779.3	12679.2			12679.2	1295.33
						4402.25	17010.2			17010.2	2842.81
						11178.8	11575.2			11575.2	610.92
						14984.6	12252.9			12252.9	1006.21
						20927.8	15799.1			15799.1	4035.17
						19487.1	11143.1			11143.1	3135.57
						22013.3	16408			16408	2537.92
						23724.1	18061.9			18061.9	1036.86
						24868.4	14612.7			14612.7	2118.63
						3165.21	15085.4			15085.4	1842.14
						12075.1	15967.4			15967.4	1899.14
						25698.3	9972.66			9972.66	1004.72
						14740.6	15513.8			15513.8	2155.36
						13200.1	13121.3			13121.3	1447.72
						14502.7	13820.9			13820.9	1105.68
						11047.4	13686			13686	1046.21
						10762.3	11848.8			11848.8	3000.64
						12052.5	15672.5			15672.5	2313.86
						11495.2	13561.1			13561.1	823.267
						18670.8	17711.4			17711.4	1430.11
						20012.2	15515.7			15515.7	2296.38
						16460.7	17602			17602	1639.85
						13051.5	18290.5			18290.5	3542.48
						11711.8	19140.8			19140.8	1813.46
						22994.9	17627.6			17627.6	2902
						8433.55	18016.9			18016.9	1822.67
						11287.8	12754			12754	2301.77
						21027	17514.4			17514.4	755.138
						12272.6	15806.9			15806.9	1490.69
						9644.89	13522.9			13522.9	1005.1
						12304.9	9710.96			9710.96	2554.18
						16786.5	14761.9			14761.9	1629.69
						12093.6	16080.3			16080.3	1013.36
						11371.1	13624.8			13624.8	2162.04
						2406.5	19574.2			19574.2	2293.72
						12322.8	11641.3			11641.3	1158.63
						7212.37	12132.8			12132.8	3290.03
						11117.5	33000.7			33000.7	1714.81
						6747.86	14004.1			14004.1	577.867
						6337.61	13837.8			13837.8	2667.43
						11484.7	15089.7			15089.7	718.652
						11031.5	16154.3			16154.3	1472.46
						11760.3	11438.1			11438.1	1844.17
						14135.7	14419.3			14419.3	1026.23
						12525	14892.5			14892.5	1065.5
						12930	11593.6			11593.6	1043.82
						13125.9	16627.6			16627.6	1561.03
						4798.35	11074.7			11074.7	1975.41
						11754.2	12695.4			12695.4	2073.52
						4819.36	11746			11746	2099.45
						12304.3	12360.3			12360.3	1138.23
						4737.95	11521.3			11521.3	1676.29
						5555.36	16144.1			16144.1	650.393
						13395.8	10179.9			10179.9	1325.46
						12272.1	10185.7			10185.7	1511.58
						16986.2	8031.43			8031.43	1442
						13215.2	7688.92			7688.92	866.5
						17863.6	10550.9			10550.9	932.607
						14201.7	18944.5			18944.5	1539.75
						7983.86	17537			17537	831.042
						14299.2	15159.4			15159.4	641.367
						15495.2	16555.1			16555.1	1269.37
						13494.2	17148.6			17148.6	1350.03
						13892.6	13602.1			13602.1	1233.45
						15856.8	21073.3			21073.3	2582.39
						12919.2	12903.1			12903.1	2306.67
						14377.3	19380.3			19380.3	1984.58
						17479.7	21056.4			21056.4	4145.72
						18577.9	16862.5			16862.5	1393.29
						11989.1	15461.7			15461.7	1278.69
						14941.7	19871.9			19871.9	3586.58
						17264.5	16490.8			16490.8	1131.93
						13440.2	16300.2			16300.2	1263.79
						15281.4	13424.5			13424.5	1214.2
						11260.4	37426.8			37426.8	2210.69
						24274.1	15206.3			15206.3	1523.47
						20415.2	15240.7			15240.7	2218
						20890.9	14217			14217	1228.93
						24212.9	13307.2			13307.2	1090.23
						16772.5	15501.8			15501.8	1144.07
						14528.4	12418.7			12418.7	1315.77
						16091.2	13366.9			13366.9	1663.54
						14642.7	10159.7			10159.7	3950.77
						19350.4	40371.6			40371.6	2558.14
						19291.3	16395.4			16395.4	2145.41
						13399.8	17339.4			17339.4	2225.03
						13687.3	17900.7			17900.7	1870.17
						17146.8	15171.7			15171.7	999.759
						16424	18542			18542	1558.18
						24171.2	16318.6			16318.6	1616.1
						22951.1	14524.3			14524.3	1032.31
						21452.1	16637.5			16637.5	1707.63
						11759.8	14016.7			14016.7	2735.56
						4587.07	14717.6			14717.6	3074.55
						12305.3	15618.3			15618.3	551.357
						13038	16806			16806	823.69
						17520.4	13162.4			13162.4	2145.26
						18821.6	14497.7			14497.7	1403.93
						13723	54428.7			54428.7	3252.4
						13823.4	16995.8			16995.8	2888.52
						14822.6	13180.7			13180.7	2001
						11904.8	12566.8			12566.8	2424.11
						15018.6	16331			16331	1186
						11476	23272.8			23272.8	2260.7
						21120	16351.9			16351.9	1302.14
						10018.1	19232			19232	1775.29
						12914	11700.4			11700.4	2770.35
						14891.3	13766.1			13766.1	808.069
						18156.5	15277.7			15277.7	1856.55
						1913.64	17460.9			17460.9	2244.86
						2532.38	12470.8			12470.8	2854.25
						2217.65	23449.6			23449.6	2576.93
						2176.62	13703.3			13703.3	1013.82
						2750.37	15351.3			15351.3	2279.46
						2480.71	20181.9			20181.9	1662.46
						1828.21	20529.7			20529.7	1777.58
						3268.67	15739.3			15739.3	869.931
						3727.45	12648.5			12648.5	2718.57
						3827.23	12058.8			12058.8	2449.43
						4540.28	10989			10989	1900.36
						4871.86	53871.6			53871.6	5645.32
						2815.06	37868.2			37868.2	3458.38
						1784	14440.1			14440.1	1218.52
						3307.9	11646.6			11646.6	851.655
						10004.6	11067.1			11067.1	1249.28
						15301.4	12376.5			12376.5	817.533
						9186.58	12671.2			12671.2	1002.54
						6942.45	20836.7			20836.7	2366.03
						9452.07	15228.3			15228.3	2553.97
						8447.43	21498.8			21498.8	1914.13
						8233	15316.3			15316.3	1598.73
						9995.97	15778.5			15778.5	1081.9
						12269.6	20250.2			20250.2	859.2
						5411.48	20214.2			20214.2	1557.83
						12378	17107.1			17107.1	873.345
						12962.6	19964.1			19964.1	1506.4
						6739.31	37079.1			37079.1	1022.07
						10799.3	17525.3			17525.3	1178.66
						10523.2	16289.8			16289.8	1315.68
						7690.04	18780.3			18780.3	3853.5
						10319.9	18544.2			18544.2	2872.48
						6902.72	16930.7			16930.7	927.4
						8839.5	48307.3			48307.3	1735.38
						11024.3	20849.6			20849.6	2370.03
						8010.12	14958.4			14958.4	852.391
						9411.96	15923.6			15923.6	927.414
						8554.15	14716.3			14716.3	795.731
						10080.5	12690.1			12690.1	1128.97
						10120.7	15026.6			15026.6	966.724
						8014.6	13898.9			13898.9	1005.83
						10767.7	17492.8			17492.8	1756.79
						8574.93	18731			18731	658.045
						10639.7	14125.8			14125.8	1407.41
						8170.45	14884.4			14884.4	1395.1
						8822.38	14893.7			14893.7	2057.63
						6616.03	16685.7			16685.7	991.767
						8145.33	14718.2			14718.2	2093
						5026.52	14731.3			14731.3	1609.79
						3088.67	11859.7			11859.7	1101.73
						4177.24	18660.7			18660.7	1529.2
						7710.03	18607			18607	2413.41
						5867.18	16154			16154	1784.79
						8569.52	16223.9			16223.9	1142.93
						6678.97	17604.8			17604.8	1521.07
						8959.5	18280.9			18280.9	2838.54
						7273.82	21108.9			21108.9	3337.68
						8768.5	15514.7			15514.7	5552.31
						3938.16	18434.4			18434.4	1070.79
						6310.38	20063.7			20063.7	2726.79
						2253.67	17429.9			17429.9	2636.43
						6790.07	17613.1			17613.1	1602.62
						5259.97	19932.8			19932.8	2577.53
						6601.61	12491.2			12491.2	3132.21
						2337.55	24287.1			24287.1	1626.66
						6019.73	15205.5			15205.5	2240.38
						6640.82	22627.9			22627.9	4165.45
						5680.5	19535			19535	1400.38
						6887.04	18672.5			18672.5	2834.86
						3572.41	23570.1			23570.1	1192.32
						5656.68	14156.7			14156.7	695.724
						7647.48	13979.4			13979.4	1526.73
						4743.29	16921.3			16921.3	4627.26
						2658.19	17875.1			17875.1	2246.81
						5969.24	16001			16001	3250.69
						5398.54	14328.4			14328.4	1921.76
						2612.07	17620.2			17620.2	1988.54
						2501.2	18141.1			18141.1	1179.79
						4119.93	18148.7			18148.7	2750.45
						5710.93	18638.2			18638.2	3134.89
						2758.76	13514.9			13514.9	2111.1
						3702.38	13802.4			13802.4	2788.61
						1765.14	17483.5			17483.5	3012.52
						15615.7	16883.3			16883.3	3406.21
						2221.93	18519.6			18519.6	1512.43
						12136.4	13910.4			13910.4	2077.14
						9167.18	19633.3			19633.3	1149.57
						2179.1	22167.4			22167.4	1637.48
						18510.6	10620.3			10620.3	9664.43
						3594.87	14955.3			14955.3	3337.21
						11589.9	15402.2			15402.2	1034.07
						12307.8	18584.7			18584.7	2097.75
						12639.2	15223			15223	5958.93
						12054	16216.8			16216.8	4711.45
						6039.34	16864.9			16864.9	1981.61
						9267.35	15988.1			15988.1	1576.54
						11933.6	15638.7			15638.7	2046.36
						15586.1	21124.9			21124.9	1199.89
						2453.12	18112.3			18112.3	1818.32
						15616.3	18862.9			18862.9	1953.73
						12263.6	19695.5			19695.5	2180.68
						11249.4	15395.1			15395.1	2085.1
						10686.3	13835.1			13835.1	4790.19
						12735	11082.6			11082.6	1300.53
						11614	9910.93			9910.93	629.467
						12756.6	16334.1			16334.1	1733.69
						11640.6	12327.4			12327.4	1113.64
						13068	10434.7			10434.7	1246.52
						3542.17	25719.8			25719.8	1869.2
						13716.7	11228.2			11228.2	2468
						13868.2	17659.5			17659.5	2175.07
						11874.1	21791.4			21791.4	3819.42
						11604	13371.9			13371.9	1464.1
						10760.7	12005			12005	3373.27
						15426.9	15129.3			15129.3	2024.77
						13383.7	20327.9			20327.9	1024.76
						10453.1	12609.9			12609.9	1520.45
						11652	13725.8			13725.8	1921.29
						10494.7	14914.4			14914.4	604.852
						10032.5	11552			11552	2391.48
						13325.4	15607.5			15607.5	654.897
						14088.4	12894			12894	1798.16
						11084.7	13334.7			13334.7	2923.5
						7248.82	9575.04			9575.04	1000.25
						9819.97	11042.6			11042.6	538.786
						8819.07	11383.3			11383.3	1439.61
						19207.2	13214.3			13214.3	1218.66
						12636	22041.9			22041.9	1458.39
						13656.6	46390.6			46390.6	2872.25
						10390.9	17634.5			17634.5	1131.14
						7325.61	14581.5			14581.5	909.345
						12100.8	15318.6			15318.6	834.207
						9631.57	12773.1			12773.1	1927.18
						9999.37	15350.3			15350.3	2046.5
						9427.73	15061.3			15061.3	889.885
						12113	12072.2			12072.2	3014.88
						12113.2	16634			16634	1132.31
						5591.52	16429.9			16429.9	2285.04
						8174.27	15623.9			15623.9	1258.21
						7576.19	15173.1			15173.1	744.31
						9215.68	16884.5			16884.5	1899.82
						6747.97	13405.5			13405.5	2137.58
						7643.25	12337.2			12337.2	1663.21
						5124.21	11387.1			11387.1	840.414
						6452.81	11196.8			11196.8	1144
						4541.72	13555.1			13555.1	3071.38
						7500.62	12551.8			12551.8	1103.93
						3116.33	15588.1			15588.1	1811.23
						5253.38	15260.5			15260.5	1306
						4918.89	14995.4			14995.4	2160.07
						5761.03	14432.4			14432.4	2964.24
						6093.89	19732.4			19732.4	787
						5569.18	11887.1			11887.1	3225.4
						4561.07	14567.3			14567.3	1996.72
						4187.53	14266.8			14266.8	1677.34
						9206.59	12556.7			12556.7	2054.04
						6175.69	17753.2			17753.2	1447.63
						7054.24	13363.5			13363.5	2486.21
						7592.57	12544.4			12544.4	3442.38
						9209.73	13841.1			13841.1	1103.93
						8273.96	19726.9			19726.9	1768.88
						4384.31	14081.5			14081.5	2262.17
						9028.44	13844.9			13844.9	1770.3
						7331.97	11023.3			11023.3	2016.36
						5063.5	15261.1			15261.1	1986.79
						6706.75	18906.3			18906.3	1751.04
						5746.04	14238.3			14238.3	2529.19
						6114.65	13330.9			13330.9	1584.37
						7350.04	14285.8			14285.8	1480.79
						6890.71	10696.3			10696.3	1794.04
						4087.1	13234.6			13234.6	1829.24
						10366.7	21878.5			21878.5	1541.46
						11192	13016.7			13016.7	1966.97
						7501.89	12956.8			12956.8	815.207
						11693.8	14697.5			14697.5	1984
						7619.48	13145.2			13145.2	1053.07
						9714.07	16665.7			16665.7	3025.5
						9250.03	11953.7			11953.7	1275.69
						12525.6	17997			17997	1538.27
						8254.9	15720.5			15720.5	2177.77
						5989.1	20520.6			20520.6	1433.63
						8535.32	15259.3			15259.3	2059.66
						7526.52	15905.8			15905.8	2271.11
						6203.93	16486			16486	1383.79
						7494.93	15481.8			15481.8	1274.62
						13414.6	15974.9			15974.9	2634.79
						2222.45	18136.7			18136.7	2810.17
						11036.8	15692.5			15692.5	3534.67
						7809.32	19012.8			19012.8	886.172
						8152.59	18906			18906	2111.7
						7238.48	15155.5			15155.5	1941.5
						6999.14	13817.5			13817.5	658.483
						10818	18415.3			18415.3	2496.89
						7096.37	12325			12325	1625.72
						8548.77	12886.9			12886.9	2407.83
						10132.2	15627.9			15627.9	1243.28
						2353.59	21592.5			21592.5	1970.15
						9230.31	14843.4			14843.4	3211.03
						7508.27	13246.9			13246.9	1089.57
						11301.6	14863.7			14863.7	1752.97
						8888.73	13235.3			13235.3	3278.69
						7718.45	16129.2			16129.2	1949.48
						8911.59	16024.9			16024.9	3039.59
						7699.15	16972.4			16972.4	1777.07
						12985.8	13204.5			13204.5	6244.68
						7456.41	16289.7			16289.7	3080.7
						2753.74	19019.3			19019.3	1058.07
						7481.52	16593.5			16593.5	1831.36
						6596.26	15890.9			15890.9	607.714
						10169.3	16954.7			16954.7	982.296
						7379.81	31538.4			31538.4	2016.93
						7134.41	27060.7			27060.7	1368.27
						9228.23	13898.4			13898.4	4078.52
						8292.93	15036			15036	971.655
						9729.86	19396.8			19396.8	2390.96
						6223.89	15650.7			15650.7	807.517
						3686.92	14843.9			14843.9	1778.82
						6971.24	14169.5			14169.5	815.107
						12273.3	15590			15590	1385.31
						12053.3	15504.5			15504.5	3652.17
						5878.04	45279.8			45279.8	1481.46
						7605.41	16870.2			16870.2	1734.29
						10210.7	17060.1			17060.1	2642.64
						9561.07	17097.1			17097.1	670.826
						10453.7	16044			16044	2030.1
						1918.47	16062.7			16062.7	1572.93
						9707.79	14481.7			14481.7	1903.1
						7640.9	16512			16512	3010
						10080.1	19954.3			19954.3	3982.34
						1775.57	19623.6			19623.6	2412.82
						9513	13241.4			13241.4	2484.83
						10450.5	20067.2			20067.2	2698.37
						4609.22	19575			19575	2831.6
						10189.9	12278.9			12278.9	734.25
						12495.4	19691.5			19691.5	1291
						9291.1	10486.3			10486.3	4402.72
						8218.57	11129.8			11129.8	2078.53
						9016.69	13940.2			13940.2	1727.86
						9377	18697.3			18697.3	4312.29
						2548.14	12887.6			12887.6	3366.57
						12540.6	12499.1			12499.1	1411.61
						2698.32	9891.29			9891.29	1215.68
						8101.7	9972.03			9972.03	4342.1
						2689.13	11817.1			11817.1	2486.04
						10768.9	14342.9			14342.9	2025.84
						7829.8	18486.5			18486.5	1318.48
						3059.66	16161.9			16161.9	1968.03
						9997.93	20422.2			20422.2	1168.81
						11533.8	23178			23178	838.269
						10167.4	14769.5			14769.5	1361.67
						2689.9	17155.1			17155.1	1100.79
						9790.25	13404.5			13404.5	6881.57
						9888.9	16309.1			16309.1	3981.09
						10274.7	16253.1			16253.1	3271.93
						26129.6	26735.3			26735.3	3309.83
						3434.28	15164.4			15164.4	1342.55
						6584.1	13572.8			13572.8	1529.5
						9324.59	17834.8			17834.8	2778.45
						14683.5	16153.6			16153.6	914.621
						11326.7	17492.6			17492.6	3106.55
						12869.9	16487.2			16487.2	1704
						12277.9	15433.2			15433.2	2451.24
						14367	13942.2			13942.2	1498.07
						10265.6	12485.2			12485.2	922.966
						12941.4	14954.3			14954.3	759.821
						11234.1	14317.1			14317.1	1442.12
						12348.4	15510.9			15510.9	1061.86
						13640.6	20413.8			20413.8	3943.76
						9425.41	15404.7			15404.7	680.704
						12861.9	21202.3			21202.3	1335.37
[truncated: 1,997 more rows]

## Sheet: Fig3-supp4
	Panel D			Panel E				Panel F
	mSc only	mSc and mGl		mGl	mSc - non	mSc - colocated		mGl only	mGl and mSc
	15458.7	6014.27		1019.87	3434.85			2328.64	2028.48
	14992.1	9563.04		1048.66	8787.23			2070.18	23015.8
	16559.9	5361.79		1061.64	5249.84			1721.42	9971.68
	14442.7	3016.45		1065.27	7082.3			6843.21	7002.07
	16189.1	1207.58		1074.83	2798.71			2450.82	2456.92
	3167.94	3470.79		1078.86	4615.12			9013.98	5961.32
	12876.7	1552.59		1081.66	7426.88			2695.82	7396.37
	14280.2	2655.46		1090.29	2073.23			7935.44	3228.36
	13146.6	1913.31		1091.64	14440.6			3752.38	5449.13
	6009.62	9040.63		1097.43	4967.58			8366.77	8688.68
	8880.93	15397.1		1098.63	2387.11			2304.45	1094.74
	543.367	8067.68		1099.91	1461.19			5766.27	3865.7
	46646.1	13931.5		1101.67	2569.39			2951.12	6345
	750.793	6712.9		1119.09	3025.36			9741.66	16257
	1121.75	6363.45		1119.53	2963.95			12392.2	4274.58
	1273.41	1577.34		1119.88	7013.62			7761.73	2600.88
	923.423	2056.17		1119.99	3238.86			1162.32	12553.9
	9020.03	1348.22		1122.02	8300.62			15287	7946.89
	662.267	4408.79		1127.52	2225.6			13968.4	7536.28
	656.518	11121.5		1136.14	1641.39			16139	1278.3
	33376.5	2665		1145.96	3731.65			16939.9	8425.16
	14939.8	1020.74		1152.34	1095.14			13666.8	10934.1
	11240.8	5590.74		1153.25	2187.82			2969.66	17914.2
	21382.2	3336.37		1173.66	3093.57			8071.59	3009.91
	1214.59	2115.61		1177.76	6523.58			1812.1	14496.7
	18286.1	10584.3		1180.03	5862.9			16678.5	3035.73
	18322.8	4055		1182.53	2432.93			15905.3	1701.76
	18217.5	6145.58		1190.02	4891.19			1356.93	2766.12
	17141.4	4921.28		1190.68	3592.93			5827.51	8804.21
	18619.3	11765.9		1201.2	1995.61			2394.2	1915.78
	17536.3	2741.54		1201.89	1591.45			9455.68	1349.05
	20318.2	2467.36		1211.57	3716.45			1765.52	1821.44
	21185.9	5690.42		1217.39	5519.98			1017.74	11710.2
	18647	1835.45		1225.2	949.203			2538.28	10819.9
	22641	2662.7		1243.33	3660.22			3631.22	879.569
	10791.8	2475.76		1251.59	7647.03			1028.04	5297.08
	14302.7	7012.46		1253.96	8491.5			5648.4	7252.09
	17756.4	911.821		1287.3	1074.87			9175.38	6197.4
	18560.3	2631.31		1287.4	4050.59			10475	9988.1
	17556.8	2158.13		1294.18	1320.77			7837.43	7444.16
	19265.5	3049.31		1296.21	3114.22			3257.55	7568.42
	21004.9	18183.4		1303.45	7012.1			2880.31	3749.56
	18744.7	1888.79		1316.38	4065.71			1823.63	7756.93
	21978.1	908.964		1327.38	2327.9			1312.12	7114.08
	19224.1	3539.17		1338.35	2105.05			11770.5	12827.1
	59965.1	3065.64		1345.09	7683.67			3016.64	4849.27
	18590.2	1187.17		1347.13	6884.87			2899.6	10206.5
	8791.27	3393.35		1358.08	879.532			16759.4	8494.6
	19325.8	5906.9		1359.36	1615.97			4189.14	2567.51
	2478.46	1205		1362.56	2720.96			12366	10368.2
	17412.5	5757.04		1364.68	1010.03			10878.6	8196.12
	14800.5	6699.59		1369.75	5199.35			5317.02	3269.64
	955.808	581.179		1374.41	1961.47			9258.21	13319.1
	12163.6	3108.26		1396.91	2438.56			6116.67	6388.27
	24983.8	903.571		1402.93	1010.81			11425.5	9056.2
	13922.6	3114.11		1418.98	2825.13			11257.2	9682.9
	16982.8	769.31		1420.36	1912.09			1252.22	37842.9
	17591.5	2532.89		1424.27	1748.23			11649.6	10926.5
	16461	4465.45		1429.05	5745.31			7335.17	6873.07
	7779.27	1518.83		1430.66	1254.66			3687.15	7268.78
	13536.9	1477.14		1432.46	3643.38			3477.9	10812.6
	11486.7	3299.79		1436.29	1409.57			2711.26	10936.9
	12400.4	4666.19		1437.94	7871.04			32324	6200.78
	13103.9	3775.54		1458.89	5441.95			1651.62	2901.36
	13446.9	3755.64		1484.01	5727.21			1225.03	12357.5
	11735.4	25230.9		1494.29	6570.99			7820.55	10503.9
	14602.6	9025.44		1497.6	1237.33			8082.02	7033.14
	4863.62	17897.5		1504.46	2278.98			12182.7	9450.59
	9157.48	14564.6		1532.35	7827.54			9856.66	9049.09
	2024	10332.6		1536.22	3976			7981.3	8752.2
	4067.57	6962.28		1546.71	2504.66			10142.8	2525.27
	13231.6	3483.96		1547.11	3650.42			7039.95	9018.37
	12277.5	20868.4		1564.04	2529			8319.08	10333.8
	940.607	4083.5		1571.57	2330.49			18086.1	11699.7
	971.227	5423.67		1596.56	780.803			7932.51	3963.96
	8698.72	4055.37		1600.89	7165.13			7380.06	32077.8
	4068.72	9045.43		1601.14	3408.71			2244.01	11189.3
	5891.11	6127.73		1601.21	6267.06			8481.54	6589.9
	7662.79	2428.86		1606.73	4039.29			7022.97	17484.7
	15136.5	14252.2		1607.49	7419.39			15277.6	7696.42
	19878.8	5972.13		1607.87	1911.06			6906.15	11229.5
	15107.4	5571.87		1620.16	5540.74			12150.8	7729.71
	18338.4	6594.68		1628.43	11479.3			10791.4	7695.93
	18672	15357.3		1635.6	6231.65			9384.49	10837.7
	21141.4	18709.5		1639.29	2171.49			1960.07	21626.9
	21076.9	1114.06		1644.79	6724.77			3408.67	9466.51
	18339	6123.33		1669.56	3017.98			9581.33	9351.69
	15645.6	18750.5		1675.05	4615.43			15224.6	17120.1
	18233.9	7569.67		1678.86	2556.06			12974.1	8924.9
	1033.56	17428		1680.56	2085.46			5404.45	9210.2
	20884.6	1680.45		1683.59	4746.49			11718.7	14381.1
	18361.7	19188.2		1688.76	1637.43			13659.8	9213.72
	1455.07	2846.77		1701.14	2238.04			1413.95	9352.84
	725.263	11547.8		1716.5	2021.37			4610.17	8227.59
	19536.8	5804.9		1736.57	1754.51			10569.1	10061.8
	21477.1	1813.65		1744.07	6186.12			5434.65	4841.92
	17294.5	6932.21		1768.41	3516.11			7314.08	1214.95
	19101.5	2375.92		1777.71	4887.78			8330.27	12390
	8822.5	3272.9		1783.25	2505.22			3570.22	8184.42
	20058.1	9519.4		1785.82	2337.69			9533.87	9586.49
	17381	12942.5		1809.81	5274.21			3867.63	19204.3
	1356.24	5765.45		1819.65	1920.98			10635.8	16592.6
	3494.1	1671.93		1820.6	2356.46			4799.37	11049.3
	19609.2	7248.1		1834.59	1083.48			5397.75	7367.51
	19088.7	8252.86		1835.66	5539.19			10698.4	10804.9
	19749.1	1716.79		1837.48	880.878			11056.6	8083.5
	20038.9	6026.32		1840.44	1477.56			11445.5	7573.36
	3453.72	10211.4		1842.52	6849.03			12666.8	2811.05
	18512	6062.44		1850.64	1513.42			11781.9	11269.6
	21841.1	7167.08		1904.65	9334.56			16287.1	7551.61
	20870.5	7155.28		1906.69	12084.2			10503.8	9451.22
	22332	4058.47		1909.67	5417.86			9499.89	8755.35
	17932.6	6804.17		1915.91	2604.15			5932.55	12247.8
	18875.1	1573.1		1917.07	3419.89			1688.19	8245.69
	15893	1789.93		1917.31	1139.65			9880.02	8584.72
	18786.4	13564.4		1920.69	1142.83			3657.8	4156.22
	18675.8	8481.78		1921.11	5320.82			10191.6	2204.15
	20663.2	6118.68		1921.46	5761.2			1483.37	2216.13
	23141.9	11228.3		1928.8	6625.46			5037.95	3045.83
	17923.7	10424		1939.96	743.573			9702.11	7122.13
	24123.3	2432.32		1969.71	2984.45			11830.5	4613.8
	21749.4	19080.6		1983.62	4092.31			1778.04	3440.35
	19347.8	12181		1989.34	1256.04			40445.5	3745.54
	17068.5	8737.8		1995.87	7113.87			4822.24	14255.6
	19591.5	18304		2001.68	3643.85			9435.25	2752.33
	18244.8	5752.8		2015.99	5551.02			3611.41	8854.65
	19317.2	1545.69		2022.49	5561.97			1038.87	8032.66
	20586.1	11468.1		2022.5	5962.65			7235.85	1523.12
	19790	8764.7		2023.86	3784.63			7373.11	6854.31
	18023.7	3359.53		2026.56	4468.33			11602.6	10879.3
	20090.3	9140.5		2031.95	1803.83			865.388	10189
	21515.1	19769.6		2032.4	4128.27			4540.11	8151.39
	21462.1	5044.15		2038.55	1000.95			9984.51	12714.1
	21038	57797		2045.98	6842.18			13928	3517.16
	9790.43	5082.68		2047.69	3565.37			12784.2	9159.76
	18678.5	11974.4		2049.52	7580.89			3978.84	4559.81
	15856.5	8758.47		2049.6	2304.58			996.394	10614.2
	15025.7	32865.5		2065.43	7366.92			1025.1	9129.4
	17440	5552.46		2071.89	3553.61			12128.5	11498.6
	14766.7	8756.88		2075.33	988.596			3789.74	12719
	20125.8	9558.11		2077.05	4868.05			1855.76	8163.42
	17591.1	1932.62		2088.12	18686			9991.74	14135.9
	25912	6798.96		2091.95	7937.06			9915.87	14000.7
	17493	8121.08		2099.77	5831.92			11589.6	9786.2
	16926.8	17341.7		2103.5	2244.09			11921	7006.84
	17953.9	11619.8		2109.43	2734.53			10600.2	3025.86
	37790.3	1576.62		2111.63	2091.3			12265.5	4257.84
	16490.5	1301.76		2111.92	1569.43			6454.72	7788.48
	17786.3	2181.45		2113.8	6013.03			3988.01	4138.12
	16920.4	1894.14		2127.11	6328.21			1775.9	7287.07
	16249.6	6434.14		2135.68	2123.11			4662.04	11358.8
	18861.7	11604.2		2150.38	1027.43			9333.55	4429.57
	3791.1	2056.69		2150.63	1122.91			13239.7	8575.7
	592.5	5650.87		2150.97	1500.59			10708.4	9952.07
	8857.71	3868.66		2151.43	2424.39			8524.7	12694.8
	14354.5	5169.62		2162.44	1106.09			8918.72	11995.1
	14590.9	1222.86		2165.51	2090.71			9297.85	10406.1
	18239.9	1938.37		2173.14	4938.07			10563.3	9325.33
	15657.2	1100.68		2182.14	1080.18			10652.2	7591.66
	12940.1	3670.62		2185.49	1279.88			9158.54	4686.09
	14142.9	1115.29		2192.04	1358.21			12886.7	5609.87
	19697.1	1773.61		2192.97	6845.56			10663.4	13692.3
	14591.8	6357.65		2193.7	3858.78			9848.95	4522.04
	11801.8	3136.75		2194.86	3202.67			8765.71	7248.54
	2804.65	849.586		2205.27	3074.31			12568.5	8852.75
	1688.17	1643.81		2208.49	3770.93			12496.6	6450.45
	9255.16	870.828		2218.73	990.974			11407.6	12805.5
	11613.4	674.107		2223.14	12764			11421.8	10897.9
	13303.3	2828.71		2238.94	2190.55			13207.9	4690.52
	1240.48	1547.14		2240.13	4018.52			8056.07	11432.4
	11206.5	3759.56		2264.09	1097.31			2372.16	8803.87
	12389.5	1037.57		2265.4	5450.86			17467.7	11705.1
	16266.1	3641.57		2290.84	1938.74			2445.03	11461.7
	13438.5	6173.69		2305.04	3521.12			3276.35	11722
	10107.6	1573.62		2307.02	4091.89			13515.3	9712.9
	15760.5	3914.47		2309.11	6776.16			3623.84	9066.96
	1426.87	4634.13		2312.13	5623.01			11456.5	11972.5
	17324	1576.63		2313.86	1079.85			8156.98	3968.77
	18866.6	2028.47		2316.03	5862.04			12337.7	8060.78
	19787.1	2370.93		2316.66	1103.59			4415.41	4486.91
	19689.5	1388.04		2331.24	1470.25			15275.6	12831.8
	24351.2	3135.03		2331.88	6533.68			18897.9	8959.16
	15563.4	7586.32		2338.33	2304.61			16594.5	2133.29
	20525.4	1535.41		2348.43	11015.1			4054.95	7371.37
	19584.8	6012.3		2358.16	992.366			13904.1	2021.21
	16943.1	3183.38		2365.82	3554.73			16194	2713.04
	21197.3	4030.38		2369.51	2373.5			11645.5	2267.24
	20886.9	1502.34		2369.83	7995.37			13137.4	3566.34
	10421.1	805.931		2401.54	6161.4			15570.5	1058.59
	8899.5	10965		2411.54	5084.16			14479.2	1123.65
	14775.3	1030		2421.64	4481.78			17372.6	4544.04
	17639.4	1167.87		2425	2991.09			21683.2	6562.86
	18454.3	763.917		2427.52	3656.64			13102.3	9087.48
	14955.8	12442.3		2449.34	2722.73			15106.8	18124.5
	20557.3	7188.4		2459.82	1442.27			12683.4	8363.79
	17892.6	4902.93		2473.35	4697.41			17295.6	11908.5
	25518.3	1107.56		2501.52	15601.2			3637.09	12371.6
	16312.5	4487.79		2503.31	1351.84			12759.6	6996.73
	20724.8	11897.7		2516.53	1480.35			3725.74	10209.1
	17627.6	6194.63		2517.58	1511.55			2123.79	2068.28
	27152.9	7235.59		2522.9	1250.59			12946.2	12370.7
	15859.6	5111.04		2530.3	1132.47			12108.3	4448.4
	12480.4	38365.3		2534.73	5184.93			12561.7	10216.2
	8973.77	2075.08		2535.33	3065.89			17998.7	7338.35
	23112.1	4782.25		2555.95	1471.46			14136	3432.44
	20122.7	2890.13		2561.79	3309.1			12764.9	4654.87
	15653.6	6025.76		2582.94	3473.64			13203.8	4719.95
	16158.4	4772.96		2595.21	865.676			13060	8632.63
	16411.3	2631.82		2611.26	1328.19			14112.2	12628.8
	24382	2155.43		2626.06	3667.7			12214.2	11483.4
	16579.5	4800.29		2652.18	1112.95			13178.2	1267.75
	22138.2	2333.45		2653.38	2128.98			12757.6	9909.74
	20410.6	2179.93		2658.95	1310.99			10757	10136.7
	16080.9	956.52		2662.36	4987.16			13661	6421.42
	15727.8	3359.8		2681.32	905.773			8718.57	8287.63
	33183.8	14220.2		2692.27	6990.75			9778.4	6451.56
	17759.8	8815.59		2696.24	7469.24			4658.09	10856.1
	19903.5	15937		2696.43	3543.79			10372.7	12748.1
	20944.8	12776.1		2696.58	1120.17			41807.7	4446.54
	13698.5	10829.5		2722.2	4304.93			10081.1	2416.9
	13527.6	12436.3		2732.31	2967.98			13301.5	6230.04
	10814.4	17485.4		2749.98	2056.48			4879.42	5662.65
	13126.5	4991.46		2756.94	3949.76			13368.4	12433.5
	21419.9	1054.24		2757.64	962.846			12754.5	11731.1
	15520	5489.2		2768.83	944.249			12015.7	16886.1
	20893	7432.84		2785.08	4263.56			10815.6	12787.2
	14081.3	3136.87		2786.32	720.954			12602.7	12493
	19098.1	6856.62		2793.35	1865.62			5169.8	8930.91
	15172.1	5310.67		2798.89	5273.11			12135.7	8125.47
	18866.8	10012.9		2804.27	1381.33			9127.26	21094.2
	20069.2	7074.04		2807.14	1231.17			8175.04	16539.8
	21899.5	12967.3		2812.64	1150.16			12610.4	3933.11
	20133.8	6943.43		2815.46	644.02			12315	14078.9
	16487.3	4583.52		2824.5	4027.53			13016.1	12396.1
	5880.9	9526.07		2824.52	1167.38			10979.2	12344.6
	17818.3	8997.45		2827.93	3639.15			12738.6	12381.4
	5368.72	14110.8		2832.23	1297.43			10056.9	7752.62
	18128	3384		2836.16	989.32			30869.8	14750.5
	15317.9	8801.64		2851.63	1568.65			11436.2	13583.4
	16956.8	10555.2		2857.74	2246.14			10318.8	12194.2
	2924.32	9102.67		2858.92	1228.47			7438.27	32283.3
	11141.4	8347.74		2870.72	6540.9			11652.8	43460.8
	13557.8	29834.8		2870.78	1606.47			12246.1	13806.1
	16204.5	22259.5		2890.17	5979.86			6804.32	9406.06
	20385	3336.6		2893.95	1011.3			13016.5	13442.6
	15210.4	3247.38		2911.35	1029.98			10841.6	10616.9
	17391.6	10598.9		2916.57	740.408			8392.69	9415.11
	19932	12458		2945.03	2802.28			2313.08	12784.3
	19445.6	12833.5		2946.26	1139.93			11773.2	12102.9
	18881	12110.8		2955.39	2954.28			9626.21	12325.9
	16787.4	14150.4		2959.07	5469.78			5337.02	10990.3
	15907.5	8439.75		2964.55	6768.6			1376.02	10222.6
	17031	4757.57		2967.83	4039.88			12506.3	7477.06
	24945.4	10991		2970.81	5767.31			7181.69	12955.1
	18670.9	15831.8		2971.77	4920.84			4930.88	46464.4
	22496	10635.8		2980.2	547.946			1149.06	8552.58
	23018.8	4679.6		2982.39	952.421			13080.6	13148.9
	1574.07	2248.04		2993.42	889.796			15598.2	14131.6
	2016.62	15280.5		3006.84	673.583			12816.8	12124.7
	1304.59	16719.3		3007.56	696.315			8257.38	10108.2
	4915	2793.13		3008.81	6397.24			13171.7	33529.4
	693.097	2108.1		3019.46	1879.39			10202.1	3282.75
	33778.5	1050.31		3021.54	963.127			11071.5	11243.3
	40447.8	9048.08		3024.93	3358.47			14762.3	7598.94
	593.32	7791.39		3030.86	1378.76			15125.6	9849.71
	629.273	2760.85		3039.82	1180.94			2986.67	17014
	48669.6	978.241		3055.38	813.496			12015.8	12445
	639.714	837.467		3055.82	3018.64			10530.2	31944.5
	36377.2	711.533		3059.46	910.702			14651.4	17158.3
	14153.4	2006.55		3079.89	1042.48			15879.9	8688.9
	5047.11	4297.44		3093.23	1293.06			12915.6	8135.43
	1559.1	7573.84		3100.24	6277.82			13089.2	10932.9
	980.9	1081.07		3104.98	2114.41			14519.9	12463.8
	15594.5	1152.22		3120.43	1289.19			12310.9	9995.85
	4394.63	4184.67		3123.79	1698.15			4734.81	8719.72
	3474.56	12695.7		3124.11	1536.85			1907.62	4621.23
	22115.7	1343.52		3127.4	4045.13			12440.1	7354.4
	16491	2176.07		3139.35	5771.74			14435.8	15296.8
	16379.1	10094.7		3151.94	1795.78			12184.8	9859.68
	4840.77	13442		3160.68	1635.81			12281.6	28497.9
	22527.2	11943.8		3162.51	1212.4			15918.2	11579.4
	18925.1	2938.81		3171.55	5491.82			2596.33	3119.39
	17635.3	1932.6		3171.83	888.499			12180.7	6680.33
	15967.5	2477.5		3173.38	1328.13			22899.6	10442.4
	19090.2	3089.21		3175.6	2009.54			14821.2	3143.09
	16231.9	3869.73		3184.65	3625.06			16596.3	5842.46
	17401.8	12279.7		3196.86	5701.21			14746.9	6252.94
	10086.2	2901.86		3199.17	1864.47			21370	14827.8
	15043.8	1430.14		3241.14	784.087			13727.5	9243.02
	15144.3	3498.48		3243.25	3864.85			15222.4	8624.9
	8230.17	1290.79		3247.77	2594.56			16286.9	10003
	13736	3496.33		3250.91	2351.81			13047.3	16985.7
	22528.3	2727.85		3251.27	1732.95			5071.81	4232.72
	21015.5	3409.46		3292.8	1024.66			13548.3	5723.94
	13276	859		3296.35	4616.56			16644.1	1618.06
	4570.82	1306.38		3297.3	1719.74			12045.9	3016.74
	13784.4	1849.19		3301.04	2327.93			13189.8	6043.15
	17402.3	4901.96		3302.67	1888.51			15678.8	9862.2
	15145.3	1672.48		3305.18	1122.32			21291.4	11037
	27669.8	6883.54		3305.56	728.541			11543.8	4804.56
	16387.1	4557.59		3319.95	4013.85			13956.4	12313.5
	15925.3	3981.17		3325.18	3810.71			12299.3	4299.94
	13865.5	1829.89		3330.75	5814.19			11709.3	7497.99
	12085.1	1960.56		3334.28	5731.83			1243.79	1112.69
	17171.3	1212.71		3348.44	984.686			14327.6	9837.35
	16728.9	6198.5		3352.26	1988.36			15784.2	12195.3
	21142.3	2985		3364.35	5164.02			14207	10194.4
	15702.4	1148.57		3369.12	2405.73			14726.3	13457.9
	13520.4	956.52		3375.32	1583.52			10785.2	8248.61
	17138.2	2702.04		3385.21	3947.99			2980.01	21472.6
	30008.1	2668.25		3393.4	984.348			8178.67	2145.63
	13312	2083.36		3398.78	1724.69			6758.43	2195.05
	14941.5	1578.19		3406.15	949.224			9511.6	10200.4
	16644.7	5790.21		3411.08	2555.1			10476.6	4347.74
	16738.5	3315.03		3430.77	5093.76			7303.41	4630.57
	36379.3	1152.76		3443.73	2832.59			2624.12	2057.64
	19908.5	1009.81		3444.3	1036.31			11771.3	18091.2
	15491.3	1109.65		3456.85	4166.8			11398.5	13615
	15310.6	703.4		3458.76	1470.92			4843.98	9765.22
	18510.9	2100.62		3465.89	677.714			11350.2	14085.6
	15930.5	2434.81		3489.85	4024.12			11055.7	14480.1
	16006.1	1127.5		3508.22	2213.26			12426.6	10351.7
	17514.8	693.552		3510.07	2250.67			16679.2	10906.4
	6736.71	4796.63		3515.31	6028.93			3974.76	13611.8
	6753.65	6117.07		3520.27	1808.52			2945.45	17846.9
	8996.96	1710.3		3520.46	21415.7			6063.87	4318.57
	2739	1857.83		3521.87	2084.77			4930.5	13316.5
	15866.4	3385.21		3522.21	3099.18			10556.4	8789.07
	1693.7	1973.12		3553.72	1432.96			12682.6	13685
	14745	2541.68		3556.68	4078.33			3018.46	12961.4
	751.793	5843.29		3556.69	1027.05			13034.2	12400.6
	17047.6	834.143		3568.25	2859.39			15228.2	15334.5
	17111.3	1888.1		3568.35	1223.94			11405.9	13750.7
	18740.5	4166.73		3574.93	4188.43			14058.8	13855.6
	19682.3	1984.27		3576.54	782.18			13626.9	4525.41
	18101.8	2330.03		3579.15	859.964			13744.3	13476.9
	16890.4	3784.82		3579.56	9160.1			15662.2	11736.4
	16589.1	1114.28		3581.38	923.587			7779.09	9946.77
	15989.6	1271.24		3592.23	1052.57			17821.2	22145.3
	22502.6	1204.15		3604.27	1346.56			13028.7	16362.2
	14888.4	1649.07		3614.05	2632.26			13381.4	7140.41
	15768.3	1265.79		3616.55	1886.57			11246.4	8726.38
	15023.7	2273.15		3624.09	854.556			8788.2	6897.34
	33662.5	1132.14		3626.55	865.516			16933.6	14861.3
	21052.9	2006.67		3632.88	950.541			12160.5	8350.31
	6374.62	787.5		3633.81	2532.22			9051.94	12659.9
	16498.7	983.652		3634.81	998.181			9530.34	11623.9
	22608.7	962.077		3640.17	5579.02			15236.5	12114.6
	15761.9	1431.26		3640.32	1093.36			14639.3	18359.9
	22693.1	11140.5		3644.44	3659.09			15381.6	9345.18
	14087.8	1694.3		3652.62	954.505			18160.8	7183.03
	18976.4	1742.21		3652.85	915.191			10486.7	13619.9
	13721.7	10485.3		3653.93	4811.56			17591.6	9702.7
	10379.6	1612.3		3655.24	2653.64			2596.48	14514.8
	16677.6	4519.79		3662.1	1762.17			13286.5	14539.6
	15205.7	8912.96		3669.87	940.099			5765.4	15735
	8186.78	9251.54		3685.94	1599.72			12795.4	11455.6
	4913.86	1063.77		3691.41	1558.84			11252.5	12351.8
	18339.4	2054.16		3703.23	1147.06			12429.2	13249
	15006.8	2052.7		3704.87	925.478			13889.6	10422.1
	20353.5	1042.82		3705.93	658.407			18118.1	11695.8
	14234.5	1935.24		3706.64	1198.58			2189.54	4347.36
	15318	2958.57		3720.68	2915.24			5170.48	1873.61
	16152.5	519.966		3734.05	3302.64			3029.08	5321.21
	15576.2	946.179		3735.99	3289.78			7250.19	6926.61
	14868.8	3989.48		3744.78	1912.32			1781.72	27844.1
	17178	9066.32		3757.3	1273.87			1775.95	13590.7
	13808.7	5297.58		3761.68	1394.39			1684.75	12241.1
	14302.4	7575.61		3761.99	1559.89			2322.27	13187.4
	15456.9	6722.79		3765.95	1616.11			3365.89	13969.3
	13385.8	2347.07		3770.59	2481.24			1679.67	8673.22
	13573.8	1398.97		3782.82	938.343			1526.42	7637.48
	16679.8	1514.63		3789.27	1098.92			3755.68	2111.08
	15584.5	840.273		3789.61	2176.8			3652.36	4308.27
	19585.1	1766.74		3790.71	691.491			7531.24	3635.27
	48370.2	1306.69		3792.98	1220.99			10700.1	9728.76
	14878.6	4896.29		3794.55	2980.43			15732.1	2557.4
	17384.1	2661.71		3811.13	1879.22			7545.38	3891.26
	15962.3	7656.93		3811.62	1134.51			4813.33	2334.77
	16682.3	8716.27		3811.62	1810.56			7378.43	2231.29
	14062.2	8725.45		3834.03	6240.79			10617.3	4271.12
	17007	8978.07		3841.94	2117.17			2349.58	8219.41
	17569.4	14094.2		3844.88	768.912			15107.2	6658.3
	15902.6	3066.63		3845.08	1417.23			2828.8	10569.5
	17122.6	1553.46		3845.31	652.053			1546.57	15447.3
	15252.1	6006.38		3848.95	1006.93			2766.91	2413.77
	15178.6	4232.63		3853.12	1542.8			21976.2	5692.12
	16965.6	2135.45		3863.78	2314.53			11484.1	6598.72
	16052.2	2832.21		3865.07	731.299			11503.4	9676.69
	13820.3	2057.79		3867.56	1178.9			8829.11	1145.03
	16617.9	1643.77		3868.15	822.036			9256.31	1609.46
	17639.1	1253.31		3884.42	4595.92			1089.83	1370.54
	62739.4	10479.2		3889.35	1941.49			8450.4	1471.84
	15019.8	8456.66		3905.44	10436.5			7997.15	12116.9
	14284.6	8763.21		3905.79	1206.82			8919.51	13527.2
	16001.4	1622.23		3922.91	2101.02			9603.92	13849.7
	17420.7	3155		3924.17	4238.76			1634.87	13829.1
	16478.8	13214.3		3942.62	1950.7			2946.03	7994.11
	17988.2	9312.1		3954.87	1028.41			8203.18	15267.4
	22637.6	855.867		3960.72	1821.05			879.303	13372.3
	16219.5	9625.21		3962.69	831.082			8522.07	8521.93
	21024.5	7635.37		3973.61	1046.03			9839.09	9823.01
	20467.5	13462.6		3974.81	2441.64			1545.65	9715.56
	19612.2	10751.3		3977.02	5141.38			2579.71	12227.4
	11015.1	9801.3		3987.1	1100.86			1336.54	11888.3
	18254.1	9516.69		3988.08	2780.11			1732.47	3614.46
	20286.9	1820.93		3990.86	5387.11			2919.72	12783.6
	22769.5	8985.25		3999.04	3595.82			1070.09	16985.8
	18793.6	16182.7		4008.67	1082.47			2394.73	8719.79
	15830.5	1982.31		4014.41	5681.68			2769.93	12722.4
	17260.7	1599.42		4023.64	993.033			2403.04	17183.9
	644.737	10728.8		4044.3	1363.48			1692.62	16201
	18597	5076.13		4057.97	2663.29			2341.39	2109.03
	19834.4	12327.7		4071.41	945.326			1473.84	6129.65
	18733.6	2690.32		4075.82	4932.41			2623.61	12979.1
	20482.8	15302.7		4081.83	1090.92			7697.65	11711
	21254.6	13862		4082.85	634.222			9078.14	4760.14
	18924.4	6060.9		4102.16	910.806			2456.8	5549.5
	23604.5	10215.9		4102.36	626.287			6654.09	11227.8
	19480.5	2553.67		4106.13	717.026			10885.5	11284.8
	18952	2476.9		4110.77	3453.03			9022.52	11779.6
	20945.8	6754.24		4112.62	4245.35			9441.41	21776.8
	23336.3	1542.22		4112.66	621.796			9178.29	6813.4
	64683.2	14015.5		4118.28	5807.45			7212.88	10998.2
	18897.4	1370.11		4118.72	5389.49			7165.36	9606.95
	19524.9	12538.4		4122.44	1057			7831	1938.71
	19568.3	1423.21		4124.92	1049.22			7672.11	2518.09
	18465	5350.7		4128.23	4886.36			10937.5	5703.83
	19294.6	2315		4130.83	5568.57			9339.5	6993.38
	23417.7	1765.86		4138.06	546.044			9232.02	9719.96
	18772.8	1524.77		4145.44	636.22			2195.98	10759
	20237.3	3875.68		4161.73	3884.05			7960.37	2318.8
	19687.8	7615.17		4161.74	1104.71			7789.31	11402
	19623.2	787.077		4177.95	843.384			2668.33	12618.8
	20890.4	21189.2		4187.58	941.435			9849.25	10330.3
	18382.9	6853.24		4191.75	940.102			9022.98	6897.83
	23661	3357.33		4196.33	4799.77			9149.9	891.428
	18268.3	7168.93		4198.29	1249.83			9838.22	8786.57
	19049.9	7197.89		4198.35	4814.14			9294.71	8025.39
	19632.6	2503.4		4206.3	1540.51			9283.16	4592.13
	17119.2	3667.37		4206.56	1565.97			2663.39	13173.9
	18755.9	1336.21		4209.58	3399.44			8148.32	7242.85
	17943.1	2178.18		4213.43	2041.49			7052.64	6188.37
	17007.9	1797.45		4215.48	898.715			1841.37	3548.62
	19356.3	5603.32		4222.78	1049.43			9210.21	6631.4
	18777.3	3123.66		4229.09	1579.89			9146.78	6627.49
	19631.5	9284.52		4231.95	4637.67			12669.4	7207.35
	22577.3	1014.5		4234.35	1493.84			10768.4	7756.49
	21323	1764.58		4241.48	1051.98			7402.26	4813.89
	17832.8	1882.39		4242	1401.25			8826.24	1879.78
	17860	1762.79		4243.83	6380.86			1446.06	12605
	13749.3	2340.68		4244.17	780.241			7338.74	6341.66
	17559.1	2985.7		4253.37	1317.53			9962.34	19170.8
	18204.6	9679.7		4253.67	7156.25			3851.4	8646.67
	12410.6	4349.65		4263.17	5428.51			8483.74	8875.42
	20108.8	5196.13		4279.14	2130.87			10853.2	9235.55
	15434.1	2711.37		4280.12	3364.17			15243.2	6565.66
	15629.1	11382.4		4291.61	3091.02			6498.7	7572.9
	19374.8	1749.07		4292.23	5964.57			10340.2	10301.3
	5201.61	5267.47		4294.29	4786.66			8734.56	3454.38
	1733.64	1608.48		4304.09	847.089			2990.68	8047.31
	14471.7	5855.15		4316.66	5946.09			6943.1	6272.98
	14796	5223		4319.39	687.559			8625.45	6035.97
	17555.4	5096.61		4324.81	1926.93			9068.36	2473.44
	16056.5	3595.37		4328.24	753.08			2650.85	6167.29
	13461	1321.21		4330.91	7010.89			10164.8	5231.94
	14880	8963.78		4334.1	855.622			8733.44	1237.95
	13845.7	15795.5		4342.43	1953.85			1164.58	8572.83
	10864.3	2406.04		4356.44	695.827			7889.83	8178.08
	11316.5	844		4358.58	3006.24			938.935	10770
	13430.3	2490.25		4365.7	1786.08			7930.43	7247.48
	11437.3	664.962		4373.25	6411.41			6434.25	8128.42
	9605.9	941.964		4376.43	1170.46			1628.6	28671.1
	11849.1	2831.68		4377.89	5106.01			1259.39	3833.35
	11836.8	1596.07		4378.19	1468.89			3518.77	7986.25
	12959.8	648.857		4379.45	4841.78			2632.14	7571.9
	11522	2903.44		4389.87	2692.6			2627.24	9381.74
	20195.4	2064.1		4391.88	5421.94			1123.65	9381.3
	10948.5	11722.6		4392.06	1902.62			2723.72	9752.77
	11682.3	13039.6		4402.17	1259.11			1807.7	8228.3
	12204.3	5927.9		4408.32	1330.75			2070.59	8751.88
	44816.9	8034.83		4419.94	3633.04			1546.69	10336.1
	12703.9	9828.33		4428.01	7141.47			1134.36	7252.47
	11909.7	1420.36		4435.65	12705.1			1388.32	7956.02
	17784.5	2020.71		4437.98	1754.75			9875.11	12221.2
	17623.2	8482.7		4450.95	821.803			2677.14	9064.89
	14111.6	2574.43		4458.2	1319.33			4277.64	10827.2
	15873.6	2320.18		4464.34	644.313			1858.07	8322.87
	12529.8	5038.54		4467.03	589.514			969.338	8804.69
	15552.2	8778.93		4472.68	837.69			3044.95	7971.38
	14881.1	3434.45		4482.75	1699			2268.28	8041.87
	12964.9	4573.26		4496.19	685.787			1541.35	7788.75
	16539.6	1527.2		4500.94	1792.14			4602.87	7670.88
	13201.1	1744.87		4506.15	1359.6			3855.83	9313.37
	15261.7	3521.41		4507.37	567.637			2204.04	7617.46
	14637.8	2860.39		4510.65	6415.79			1502	8576.81
	15159.2	3552.35		4520.88	1636.69			7098.33	8568.31
	17079	5044.14		4523.37	938.289			1615.62	13742.3
	18301.8	3057		4524.17	5527.05			1540.89	13179.2
	15977.5	5443.5		4527.34	1494.81			7109.68	8592.11
	12595.2	15125.6		4529.83	4521.11			1351.09	10162.7
	15013	10109.9		4538.57	4191.11			7593.36	10365
	15218.9	7935.61		4539.52	1472.63			4630.12	9720.43
	13951.9	6754.7		4543.04	5111.41			9083.79	8145.65
	3532.75	4621.15		4550.8	861.077			8377.8	5421.74
	14226.9	2993.67		4558.24	1765.96			7595.48	8921.11
	14968.9	1315.66		4564.16	802.997			9369.39	4390.65
	14515.9	1711.79		4564.82	1770.65			7728.35	3939.9
	15692.7	1062.76		4571.11	1947.51			8704.46	7817.3
	13949	13571.7		4577.58	2447.22			7075.92	1849.8
	13279.8	7437.72		4586.49	1478.95			8035.41	889.175
	15984	4374.83		4590.65	698.524			10175.1	2487.76
	22565.1	7722.35		4597.86	1207.6			11134	1011.76
	15487	2926.4		4598.48	808.234			5965.86	8517.15
	11378	4928.17		4599.5	6365.27			10245.6	4192.63
	15298.8	1411.48		4603.5	1915.38			11468.1	3186.99
	15055.8	2214.65		4603.9	2171.16			9613.64	5572.38
	12748.2	6178.26		4616.12	971.505			10205.7	7561.02
	14403.7	2303.45		4616.83	852.174			10519.6	24585.8
	15299.2	4130.59		4625.51	4958.45			8705.44	10338.6
	15139.9	710.929		4637.42	1051.31			9768.97	1201.48
	15513.1	5121.07		4638.76	6211.69			9659	3493.77
	14553.8	3907.17		4640.86	1227.79			9490.58	2265.56
	14774.7	6852.23		4641.81	701.922			9747.46	8384.18
	16615.5	10172.9		4645.67	1214.88			8157.8	8260.88
	14714	1361.72		4645.73	1429.53			11520	8376.96
	13523.9	1005.24		4662.87	4856.92			9263.48	8922.25
	12225.2	6174.54		4664.56	6403.27			10725	8277.08
	13548.7	3653.71		4668.05	607.9			10048.9	8954.4
	15979.7	5980.73		4678.85	963.547			8398.47	2121.52
	13659.5	8961.93		4685.07	2290.51			3923.52	9262.38
	15381.3	7121.83		4691.18	2703.83			10769.5	9470.5
	14856.2	9948		4711.18	6512.44			8374.99	4271.5
	17495.4	5221.13		4712.03	3342.42			7085.05	7471
	14541.9	1642.37		4717.67	1198.19			10716.2	7861.77
	14916.4	4992.77		4727.83	3618.22			6635.59	8493.77
	16749.2	6991.73		4729.5	1445.21			9332.97	5463.88
	928.613	1065.04		4731.81	3852.65			8147.22	10020.5
	21946.2	22955.7		4732.41	2674.84			8154.05	10308.4
	16093.1	10148.9		4735.92	1607.26			7056.02	9575.79
	18204.4	1763.72		4745.81	1087.61			4783.27	8835.32
	17975.1	2712.29		4767.78	2677.73			9005.67	10005
	15715.3	7890.13		4768.92	722.721			7068.33	26790.4
	13273.8	1516.86		4770.47	1046.43			9468.5	8292.86
	14477.7	4307.53		4772.54	1094.59			6642.73	8041.68
	15107.1	7848.48		4786.68	747.256			7063.64	12332.7
	12934.5	683.586		4792.05	700.128			6291.06	36429.9
	7871.22	2609.07		4801.69	5567.5			9052.52	6288.02
	15186.3	4567.32		4807.63	1356.13			2368.79	9139.82
	15919.5	2656.81		4811.76	4208.55			1504.76	22313.5
	13921.9	6776.52		4814.74	932.861			1565.35	8944.53
	16927.2	2517.43		4814.83	840.114			2928.17	10371.3
	18416.8	6476.93		4819.54	1169.94			3876.28	5666.41
	13588.3	1240.43		4827.2	4159.42			3989.38	7570.3
	15077.1	1929.21		4834.84	1032.42			2858.03	7349.15
	25019.1	3669.5		4836.35	3591.75			1399.2	8649.93
	15194.1	11881.7		4842.94	1316.18			1427.58	14496.4
	16239.7	11385.9		4851.22	1949.53			996.265	8326.16
	15171.8	3460.71		4858.75	3085.74			3836.67	6224.89
	15391.2	12514.5		4868.19	1550.78			2567.71	6674.47
	13695.8	5777.97		4868.25	1264.51			2058.35	4607
	13768.8	3172.17		4868.44	659.163			1651.24	9046.58
	16273.3	13968.7		4870.05	924.216			2831.82	4303.06
	18448.7	16282.4		4871.51	1511.71			10762.9	10253.4
	14620.1	4538.96		4872.81	1683.51			1734.72	2130.72
	13986.5	19892.7		4876.16	782.671			1191.22	10831.4
	17544.2	9777.57		4883.79	2901.95			2712.52	5778.94
	14914.6	1971.8		4885.66	631.305			1193.73	19203.6
	10311.8	1923.82		4890.85	1345.75			3576.61	4711.69
	15646.1	2057.07		4891.08	1903.16			1610.76	2093.53
	16887.3	2941.62		4892.04	1310.12			1102.09	11701.6
	1583.14	1554.07		4895.93	2692.25			10001.1	10884.6
	34662.4	743.045		4897.56	926.147			14095.2	10466.3
	15213.8	9373.67		4902.97	1153.54			3480.47	10610.2
	15160.4	845.32		4906	1064.16			1514.24	14017.5
	14847.6	1108.55		4917.41	659.325			1085.15	8494.68
	9401.79	2195.8		4933.05	4449.63			11831.2	7815.71
	14689.8	559.615		4933.28	4449.1			12021.7	7665.44
	882.034	4852.17		4933.63	2306.08			9238.65	7026.71
	16557.5	662.179		4934.91	3140.97			1578.24	2308.51
	1012.88	1566.97		4948.08	3987.91			1577.36	6140.17
	1343.54	1504.87		4952.28	3314.57			1725.86	6161.82
	1125.76	1034.27		4952.93	2277.95			2862.31	9198.36
	15479.3	816.724		4956.82	1199.56			11161.8	8284.71
	13629.4	2312.43		4957.49	2185.32			2228.08	7633.68
	12323.6	1583.67		4961.51	1156.45			9384.04	6050.05
	13473.8	607.72		4962.53	1073.65			1765.94	6262.33
	18368	3095.17		4966.26	1102.23			10276.5	8896.24
	27545.2	656.815		4972.61	1894.93			15175.2	6318.43
	17154	1416.34		4973.49	1170.7			6028.49	8178.75
	19432.3	2257.7		4984.96	945.698			5089.04	7806.89
	28092.2	1048.07		5002.1	1784.82			9183.03	9736.2
	1585.33	5409.12		5014.45	3864.3			7654.59	3029.27
	22403.1	11154		5019.41	1626.17			10027.6	10177.8
	19726.7	523.759		5020.16	2784.39			10835.1	2116.94
	12980.6	1085.67		5020.67	4866.63			2435.4	5366.21
	20297.2	4206.52		5026.93	3757.07			10800.7	9908.39
	18537.5	12108.4		5033.21	1058.34			11036.5	7214.04
	15927.2	1776.34		5040.39	2620.97			7007.65	8401.12
	21566.2	789.259		5054.6	926.977			7274.34	7915.46
	16388.2	9846.39		5067.8	734.247			1733.36	9000.25
	16560	11737.8		5072.2	1038.26			10353.4	8020.33
	18342.7	11445.4		5078.08	2428.73			6258.59	4915.14
	18661.5	2625.19		5082.7	1236.25			7634.61	1700.59
	25404.7	3474.8		5099.18	714.008			4475.63	5006.01
	16427	1926.28		5114.25	810.903			1306.53	3808.07
	16531	2168.28		5140.99	992.38			8133.4	3391.02
	7399.56	15026.6		5153.4	2373.32			8832.28	1378.41
	17870.2	1723.17		5159.1	1644.55			9176.03	10860.8
	18331	5595.5		5166.16	584.704			9509.75	13112.9
	15982.3	10132.4		5166.49	1324.43			11080.9	7464.38
	14805.3	4920.03		5176.63	522.658			3745.52	10691.6
	16325.7	12586.3		5183.85	1111.4			1944.66	12345.4
	17371.3	5119.79		5189.84	1587.37			10570.2	10743.5
	17544.6	11314.6		5191.56	860.37			7862.02	11107.7
	15406.7	7180.48		5218.42	1079.22			5641.54	6005.84
	10447.3	4121.79		5227.07	4016.02			10569.3	12142.5
	16095.8	948.897		5228.02	965.389			5053.05	7519.68
	16796.8	624.679		5233.83	1308.86			11571.4	10327.6
	17436.3	5749.18		5234.61	1775.65			5402.05	3450.6
	27097	11679		5246.57	4152.72			12223.4	14363.1
	32231.8	770.731		5247.52	1473.82			9825.84	13809.6
	19804.9	10819.2		5255.91	1625.42			8763.63	11156
	16988.7	925.931		5263.04	2693.18			9096.5	9254.7
	17450.9	2326.48		5264.32	1692.44			6402.53	6072.38
	18111.6	3022.71		5278.91	4556.01			9821.88	11626.4
	17769.2	5969.21		5280.61	3780.43			9848.21	9264.65
	18528.4	3591.41		5291	1183.39			11972.1	8294.01
	18015.5	1028.75		5306.73	756.813			10189.2	13412.8
	26062.7	12278.7		5322.28	4747.01			9450.21	14011.3
	19460.4	3504.21		5328.71	852.278			9016.95	12179.3
	16516.5	3089.81		5340.56	978.18			9747.74	11552.1
	18325.8	2634.57		5342.39	907.178			8483.72	20938.9
	18275.9	2970.68		5343.47	3200.88			9867.9	12932
	17714.9	3235.43		5349.33	1964.57			7311.81	12282.6
	17021.7	1635.95		5350.65	1141.14			7776.16	17354.2
	17890.4	795.231		5361.67	1620.34			5063.33	9142.23
	20772.9	1758.96		5373.37	1635.32			8202.56	16301
	3663.38	1623.96		5387.49	763.306			7192.99	8415.2
	23678.8	1325.43		5391.19	606.907			7376.69	14789.8
	16762.6	2211.93		5392.04	1006.15			1903.35	4990.75
	20870.4	4131.91		5407.37	790.152			2791.29	12177.4
	12976.6	834.846		5407.47	1797.38			3800.64	5958.66
	21071.4	1558.19		5432.34	1025.71			4821.64	11788.6
	18601.6	2139.96		5434.02	2333.65			9730.69	8481.75
	3722.92	710.833		5448.12	1233.77			9450.84	6924.14
	17340.1	3065.38		5453.17	5042.65			12590	9053.89
	16707.3	1832.65		5472.11	672.033			12468.8	9488.73
	21787.3	981.37		5488.12	5155.79			14171.2	6496.9
	20494.4	1162.91		5500.98	906.476			11479	8381.07
	16151.5	11611.2		5514.18	751.215			14467.6	9061.21
	11538.8	1478.78		5525.37	5157.86			15946.3	11711.9
	15000.6	1484.14		5525.39	3439.49			11726.8	7937.53
	18963.3	632.871		5544.63	2230.57			10155.6	10662.9
	18844.7	1969.03		5587.22	1040.65			18003.5	3683.76
	19269	631.292		5589.7	1170.17			13334.5	6597.32
	13381.2	3414.55		5594.76	1044.61			9649.28	15813.1
	15529.3	640.241		5594.83	4673.75			11541.8	8800.49
	16451.4	1231.34		5595.38	3008.68			3180.72	3579.31
	1500.82	696.897		5601.58	919.923			12716.5	8951.7
	1415.97	724.321		5605.1	1617.98			10844.3	9153.68
	2221.86	547.607		5623.1	1247.01			11052	10048.4
	15912.6	1375.79		5652.43	3637.61			11002.4	4502.88
	15652	4721.68		5653.29	3875.97			11871	4231.81
	17120.8	2000		5655.79	629.1			10548.1	8985.78
	16137.3	739.5		5656.07	1283.75			12084.7	4401.07
	18441.8	6513.93		5657.14	3783.2			11497.5	3180.34
	1213.27	1605.93		5673.81	3929.13			11467.3	5113.89
	14321.6	2229.7		5679.94	1404.56			12769.5	4908.55
	11876.5	2250.68		5686.73	2791.71			1654.77	7321.28
	18133.7	2201.23		5692.71	8670.54			12204	8560.68
	13850.8	912.138		5702.6	621.429			12419.7	1530.79
	18482.1	721.24		5703.39	897.698			11993.9	6211.97
	12630.6	1990.14		5730.49	1245.05			11888.3	6819.79
	17870.5	3614.21		5735.48	1987.63			8932.13	26487.8
	13902.7	534.952		5762.97	919.461			9577.92	5986.93
	19193.6	544.482		5763.08	1991.28			10414.8	1981.01
	11911.1	1646.4		5778.75	1297.9			9169.93	3895.54
	13031.9	782.935		5794.24	3379.05			2683.84	7160.61
	11336.3	1941.14		5795.69	5657.52			10258.7	6233.83
	15190.5	6381.66		5797.85	694.065			11401.5	6122.03
	13498	970.069		5800.14	1893.11			14484.7	5062.85
	8667.13	5731.65		5809.72	1000.15			10999.6	1732.36
	9163.6	949.793		5823.6	3442.6			2313.94	8222.44
	11446.9	925.138		5823.65	853.219			10999.4	9053.62
	11109.7	5513.18		5828.57	2354.95			9631.19	7224.04
	9720.21	1494		5832.6	1036.89			10270.9	6244.78
	12735.8	1135.03		5835.26	1422.23			8663.48	1461.56
	6005.28	1101.21		5853.68	2182.16			9998.35	7232.98
	16131.4	949.731		5872.08	2749.2			10073	12186.9
	13300.3	742.867		5874.14	641.523			10043.3	8719.18
	19512	630.207		5886.22	2950.35			3189.59	4136.3
	14518.7	1376.31		5887.12	1447.07			8109.21	6716.09
	12565.8	1243.21		5891.72	744.89			1343	9637.56
	13867.7	581.724		5899.31	3953.27			7025.18	6337.76
	15034.6	1359.45		5903.04	6112.67			3991.44	12644.7
	12052.4	828.536		5909.87	1818.59			10563.3	4820.03
	13275.1	510.458		5918.58	618.802			9770.71	10342.8
	15079.6	1213.14		5925.7	755.894			3275.47	8780.29
	13663.5	721.467		5935.42	1321.8			9238.07	7738.43
	12544.4	958.115		5942.32	1073.06			11638.9	8191.57
	12850.7	2274.4		5946.87	980.23			11623.5	5899.08
	12358.3	988.64		5952.51	1276.85			11630.3	7995.6
	16047.8	1073.77		5955.12	1163.28			9946.35	12447.8
	14597.2	544.621		5957.04	3638.93			10529.8	13406
	8409.16	1743.21		5959.29	3297.98			9398.25	11105.7
	14601.2	652		5975.94	3247.75			11164.5	11017.6
	15242.1	6695.75		5984.21	1336.59			11842.8	8679.22
	15730.3	1064.32		5992.43	1028.7			9046.18	12338.4
	13590.4	930.25		5995.89	791.116			9861.31	11505.3
	26877.4	1194.41		6017.88	1195.78			11921.1	12952.3
	21551.7	7757.71		6030.25	2229.9			3194.37	10165.6
	23595.1	1552.9		6030.61	565.256			9035.26	11230.5
	23484.9	1324.3		6033.22	1004.99			9852.09	13022.9
	18496.8	1457.48		6036.01	1619.23			9987.88	8714.62
	23143.5	8350.41		6046.27	501.366			9988.46	15344.7
	18781.5	1600.6		6047.24	4260.2			10032.9	16075.9
	14511.6	3355.11		6050.59	864.708			11233.7	13287.5
	16259.8	1918.07		6059.46	4908.88			10612.4	10443.7
	14773.4	990.857		6061.18	3798.41			8939.5	13186.2
	15971.3	4737.31		6061.84	1358.22			8990.94	12787
	15794.5	8500.86		6067.48	899.388			6583	5997.23
	15781.5	4824.93		6069.63	1791.97			8619.82	10293.6
	26075.6	711.96		6075.8	1764.47			4878.98	10332.8
	16475.2	2774.13		6082.15	2888.98			9241.98	13644.3
	17854.9	1099.81		6082.44	2779.93			1811.6	8780.15
	16932.8	644.643		6090.25	1528.61			9369.59	9623.04
	18563.8	2088.29		6090.85	3163.5			9936.93	10041.2
	15941.3	1203.59		6096.07	796.112			4637.42	9511.71
	16915.4	1059.11		6097.63	1723.82			11870.8	7483.89
	15961.8	1441.21		6101.13	4021.73			10246.9	8384.46
	15284.3	2256.6		6103.19	587.509			9186.72	15493.2
	16176	6443.76		6112.68	2444.78			5139.37	13773.9
	17918.4	2465.97		6121.22	633.394			5550.85	11648.2
	19868.5	6215.13		6142.69	2167.59			11567.9	13166.6
	18154	3960.11		6145.66	549.631			10382.5	8006.2
	15765.7	2687.08		6149.67	1116.92			12879.7	9971.16
	16023.1	4922.57		6164.42	2198.34			11778.6	11311.6
	17466.8	10704.8		6173.05	2785.7			35824.9	9930.03
	16518.7	11039.2		6188.41	667.812			11180.6	10100.1
	20936.6	14327		6189.15	2924.57			12251.4	8863.8
	17117.1	6797.17		6208.79	836.384			12062.3	8527.93
	20743	1810.77		6211.32	2296.89			8644.19	8575.3
	22276.5	1261.56		6217.82	3476.69			12223.9	10982
	19468.6	1484.93		6236.66	923.425			8201.66	10310.1
	20702.2	18575.6		6238.31	789.961			10176.3	2264.6
	23210.5	7430.97		6254.87	1333.58			12165.7	1529.37
	16553.6	8548.11		6264.77	1947.25			11450.7	8869.62
	27393	2598.24		6271.16	1564.65			10628.2	10719.5
	29266.3	3402.31		6278.57	1985.88			11134.3	8313.78
	17206.6	3561.28		6280.22	1263.74			11745.8	9816.42
	23284.9	2179.1		6286.48	4880.16			11365.9	8476.79
	17503.7	14127.8		6289.76	752.915			8888.74	2825.96
	19479.7	5977.83		6291.36	2330.01			9807.41	8614.41
	21548.7	1765.9		6293.77	1451.69			10913.8	12390.1
	3914.83	2552.21		6297.75	2803.37			10127.8	8795.86
	22153.1	2480.73		6298.22	4549.1			4365.49	4691.49
	20266.1	4774.69		6306.36	1327.39			14169.8	4704.34
	24233.6	812.433		6308.78	3383.02			11564.7	1705.89
	23917	1909.38		6315.95	967.066			3653.64	8705.62
	14540.4	5464.12		6328.26	1105.67			12339.9	8404.24
	1775.52	1028.54		6336.53	3654.79			11455.4	1810.47
	23593.4	1075.37		6347.54	1450.72			10612.7	4994.96
	19487.3	3773.58		6348.26	818.334			11431.4	5027.69
	21350.2	4071.28		6364.48	719.207			13692.2	6889.24
	11714.5	1090.13		6370.41	4271.81			8884.79	7977.68
	15786.8	594.037		6372.27	7927.99			8445.12	8089.33
	19632.8	2651.52		6374.14	1250.54			10887.2	3391.05
	18832.3	775.222		6375.48	4728.7			12496.5	1351.49
	16325	1047.29		6376.78	761.283			9994.92	4234.17
	17018	1132.54		6391.89	726.031			11311.4	9542.58
	16437.6	8435.59		6402.08	1392.5			11439.8	9759.96
	15430.1	3232.89		6409.47	1473.08			14904.9	12871
	20499.4	6823.5		6414.76	1242.99			10498	3361.05
	19959.1	1367.48		6420.08	943.744			10085.5	6808.69
	14282.5	978.733		6428.67	734.742			11717.5	9815.64
	21567.1	3445.69		6431.43	7270.43			8984.79	16080.4
	15415.8	2008.45		6436.64	796.316			12716.6	12179
	20671.7	2267.53		6438.66	612.53			12469.2	18987.3
	8941.04	2820.96		6451.39	961.573			11938.1	6694.59
	12917.8	14400.1		6455.04	590.291			2874.58	9175.78
	15666.5	2213.23		6460.56	986.683			12560.7	9256.53
	16474	2361.28		6465.28	4390.06			9359.74	11277
	15353.8	800.207		6472.89	989.556			9114.02	12661.8
	13843.4	859.714		6476.94	543.571			10023.4	8738.42
	16286.4	2122.52		6483.22	3127.63			10766.6	8612.51
	16113.3	2633.34		6485.38	4706.54			8102.43	11379.5
	15261.8	14025		6519.93	568.657			6920.74	11574.1
	14399	14611		6522.47	7479.42			6829.18	12316.5
	22508	3671		6540.25	5862.12			8833.18	9574.66
	15502.4	3217.54		6555.67	1308.07			8287.43	10003.6
	12445.6	878.897		6564.39	4221.34			4967.47	11148.7
	23162.9	539.222		6567.65	618.255			2291	8730.99
	18398.1	1468.07		6574.67	4301.45			8149.03	11412.9
	17206.2	868.393		6585.51	1739.69			6832.6	10174.2
	14133.2	8254.71		6595.02	1251.47			7541.91	1701.08
	14139	1026.97		6595.5	979.997			7506.92	8865.18
	14478.5	3839.3		6596.53	2770.01			8413.64	5871.23
	15650.7	4297.88		6616.66	684.65			10344.1	2243.13
	14976.8	1947.23		6639.89	2510.8			8536.9	1894.48
	17651.5	1961.86		6648.37	1323.53			5478.85	936.874
	17629.6	3243.09		6653.49	3960.68			9170.31	2739.47
	3302.37	6406.52		6655.6	1032.16			11238	3704.16
	17753.7	1143.18		6658.16	1294.34			3105.36	25141.1
	16244.4	1195.31		6671.79	4441.78			3539.36	4338.06
	14852.5	12360.5		6685.08	4197.58			5670.83	5102.05
	14200.8	1024.1		6694.84	642.545			7635.86	4854.39
	20912.8	687.065		6701.14	1636.58			7836.65	4639.26
	2635.56	1220.86		6705.54	1587.82			5355.31	5213.63
	15370.9	1989.28		6712.26	957.977			3995.97	3484.84
	16439.5	653.897		6713.94	693.522			11639.9	1662.29
	13938	2777.1		6717.1	673.962			10647	5336.98
	13292.3	797.138		6721.05	600.472			8465.73	5087.71
	17477.1	660.654		6725.48	1265.42			3603.78	4752.5
	14719.7	2075.81		6746	528.2			10698.1	4015.75
	16808.3	1176.8		6754.55	748.643			11633.3	4904
	19683.6	859.034		6755.71	759.717			3392.11	7105.88
	17284.1	1247.97		6763.65	1398.6			11383.2	2831.07
	13499.4	1300.69		6764.56	880.17			11251.6	6585.03
	19262.5	949.571		6769.38	1461.66			12060.4	5410.85
	13874.3	4558.25		6774.4	2086.49			3247.7	5502.14
	16643.6	7671.45		6780.24	1481.59			9365.52	6111.6
	17060.5	998.862		6788.33	1644.59			12075.1	2548.01
	16430.2	2076.93		6802.66	605.288			9681.59	4958.14
	18034.3	1556.54		6813.15	3428.52			3479.66	7285.85
	23724.4	3090.42		6820.04	2254.9			3934.37	6258.24
	16363.4	1033.44		6824.76	2522.04			3239.72	6822.41
	1026.86	1510.96		6827.74	3981.98			1010.58	4749.24
	16016	1442.76		6828.58	3114.2			4832.7	6808.4
	849.552	10111.6		6833.39	791.809			7458.2	5503.15
	13738.2	4523.96		6836.22	1072.09			7936.25	5977.55
	13545.2	7781.66		6862.56	841.6			5966.1	5365.89
	16720.1	5067.93		6869.26	3411.25			21156.9	2238.57
	15745	4351.41		6875.35	2868.32			1978.73	5733.83
	12008.8	1190.92		6883.47	660.872			2837.99	1568.62
	14343.6	2783.79		6911.16	3520.69			4627.82	4796.04
	15157.6	1679.07		6914.04	3003.81			4132.93	6102.97
	16511.7	12525.1		6921.46	5647.99			6044.76	6515.43
	13036.7	11209.5		6921.86	1549.6			3735.05	3996.17
	14980.7	2432.77		6932.48	836.773			5869.13	6259.38
	688.821	3039.44		6934.8	3868.58			1541.38	12182.8
	16955.4	1728.78		6936.95	4049.45			1893.74	8437.43
	14185.6	2604.03		6951.27	1518.79			1112.42	7295.93
	16067.1	2470.96		6979.9	981.798			5324.46	7128.52
	13960.6	9098.47		6986.07	4239.25			6833.42	7163.54
	14495.3	2037.55		6987.56	972.926			2110.51	19775.4
	13206.1	4105.56		6990.49	1047.86			6535.25	7256.92
	13463.6	4409.54		6994.64	1684.69			5591.37	12849.3
	17002.7	1091.76		7000	1793.25			6950.65	7976.08
	15488.4	11404.7		7000.56	864.648			6345.08	7349.31
	14732.4	5267.5		7006.27	2977.81			5545.66	5840.92
	16062.7	9556.52		7010.78	940.914			7307.55	6279.6
	15221.7	4624.26		7017.66	940.829			1525.68	8372.75
	14185.4	10944.1		7029.1	3929.58			773.488	5401.55
	15115.5	4102.93		7031.29	6308.83			5794.64	6574.65
	15137.2	2302.62		7036.74	1219.95			4254.48	4942.16
	15050.6	12047		7046.41	2537.68			6093.25	5226.57
	13699.3	5889.27		7047.02	898.906			2441.69	9000.32
	20394.8	6129.37		7050.16	2363.67			4781.14	6264.39
	14133.1	11387.3		7075.39	3782.49			5864.97	6083.32
	14725.3	7369.03		7079.66	4091.45			6739.51	13516.9
	13068.3	8143.5		7082.32	696.452			8452	6682.22
	14050.6	10753.9		7085.66	5061.7			7735.34	6341.85
	14749.3	4686.55		7092.58	4197.87			5519.12	18023.4
	13700.7	8006.71		7094.47	2588.36			5373.69	6536.7
	15275.6	4624.97		7100.62	725.355			9490.97	2377.25
	14103.9	1331.86		7104.35	1164.37			24792.8	6312.29
	15254.9	8049.11		7111.71	1144.8			8043.75	5868.09
	12477.5	1800.18		7113.04	839.398			4647.01	7817.08
	14104.4	2160.05		7113.7	19516			5739.35	3109.26
	12804.9	1677.75		7121.67	577.651			2191.61	3499.96
	13288.5	1274.57		7130.59	1089.51			15057	6066.31
	15419.1	1310.25		7131.77	1736.84			2066.96	4855.21
	12626.3	7220.55		7132.43	775.813			6145.15	3853.04
	15139.3	1582.37		7139.89	523.704			5833.83	3450.43
	12186.8	2210.29		7156.33	707.324			6779.57	2130.24
	14330.6	5242		7160.26	1440.55			6401.07	4886.29
	13820.6	6757.26		7168.13	4452.85			7991.22	7927.91
	10882.8	6969.5		7171	695.179			7066.47	5520.81
	14993.8	604.233		7184.37	3340.56			1394.35	20749
	15741.4	802.833		7189.4	1033.34			6258.15	1454.86
	14419.8	2985.79		7214.73	2096.95			1137.08	7566.6
	12734.3	1165.03		7226.02	4038.27			7323.79	7711.5
	12507	748.483		7238.02	571.533			6153.37	1107.4
	16329.8	840.2		7242.99	892.496			5087.41	2444.24
	13502	7468.66		7246.5	4031.03			17156.3	4510.41
	16980.8	9726.93		7249.85	879.701			7544.96	7058.53
	13571.8	767.071		7259.45	648.627			1073.43	6304.65
	12779	747.5		7263.35	3403.74			760.575	5742.02
	12516	504.692		7265.18	4372.8			3128.47	6968.55
	16486.4	909		7269.01	2687.77			1399.49	5886.93
	14871.9	1547.5		7270.72	647.586			2206.52	6564.43
	15147	6979.91		7283.07	12621.2			980.934	5841.91
	11112.3	1122.3		7298.43	1192.12			1362.62	5099.99
	17585.4	1025.5		7303.59	1441.37			1864.79	4220.78
	15590.6	3154.63		7306.31	1475.75			1732.89	9482.04
	15673.2	2115.71		7308.91	2116.63			783.594	7046.4
	14009.7	1857.44		7309.72	2366.28			2183.08	5400.34
	12016.2	1361.43		7314.82	1554.23			4136.54	7418.22
	15161.2	1173.36		7318.25	1955.95			1501.11	10584.9
	14171.5	789.679		7320.69	3786.78			868.338	7554.78
	14289.9	1674.3		7325.26	2396.47			1620.55	5300.97
	12662.7	2139.88		7328.22	620.934			1680.05	21268.1
	5276.38	2100.48		7337.79	798.207			1258.54	6834.4
	12949.9	1056.35		7337.99	575.128			2341.44	15274.3
	13354.5	883.586		7340.36	2437.98			1042.76	6571.65
	13576.5	2101.64		7366.63	5547.44			1951.03	3831.7
	1462.6	965.143		7375.63	850.056			2023.16	8970.38
	11866.5	747		7381.38	1035.66			1050.89	6873.25
	15866.2	699.852		7391.4	1242.81			1137.37	5570.32
	12577.1	678.967		7405.04	3405.16			2207.6	4845.53
	14076.8	1191.24		7409.24	972.79			3086.98	7754.35
	11335.9	2054		7412.73	944.375			2624.01	18722.6
	13914.9	756.077		7420.91	4074.68			6691.47	7483.38
	14209.6	1618.27		7422.3	2167.73			5093.85	6745.34
	13870.6	1892.43		7428.37	1626.64			6621.82	8541.67
	16612.5	742.143		7430.37	662.468			6767.82	8257.35
	16998.8	1374.46		7431.37	784.842			7688.06	7328.59
	12384.9	2857.43		7439.85	1813.05			6666.01	6284.07
	15895.4	884.6		7443.5	1225.86			1358.1	6004.55
	16230.8	558.323		7449.66	2924.56			6497.87	7262.82
	17495.8	599.793		7451.83	760.138			1699.6	7520.18
	15798.9	731.321		7463.68	2076.81			6330.78	6063.41
	16379.4	574.375		7466.69	538.385			6194.29	4239.23
	15493.3	745.84		7471.14	735.367			5659.59	5210.93
	14448.7	1936		7475.53	2690.68			5727.19	2576.18
	5006.19	3303.88		7499.31	3410.37			4728.48	5975.96
	18533	919.269		7506.74	3273.77			1888.46	4996.61
	17465.1	2771.46		7511.12	1472.66			2521.74	4821.73
	17026	1034.48		7516	556.135			4839.55	3800.11
	15296.3	1141.47		7533.76	686.581			5555.45	7955.73
	14577.5	2468.1		7539.31	957.734			5773.54	4861.09
	16032.2	749.138		7560.05	844.018			5279.49	7073
	3792.05	1609.45		7566.77	3266.99			5015.67	5801.17
	13728.3	922.4		7582.34	1765.48			6731.72	4311.93
	15998.9	1206.97		7592.4	1801.58			8238.49	7553.09
	6492.73	597.833		7598.37	655.315			2928.12	7480.18
	15274.3	657.16		7602.94	2732.85			5524.04	1367.83
	11624.2	562.207		7608.45	888.492			6565.43	7013.33
	16473	1109.92		7619.12	4781.65			6198.12	7737.91
	15482.3	529.103		7620.15	2454.4			1907.45	7793.24
	16076.7	1828		7632.26	2366.98			6725.77	6892.96
	17321	1317.96		7648.72	1148.05			6858.85	7530.22
	4663.86	1128.87		7649.14	2136.59			5997.94	6993.77
	15802.1	1090.79		7654.4	1379.9			8402.83	9513.32
	14007.4	593.172		7654.85	725.409			14574.2	4972.2
	19326.7	629.867		7658.71	1228.37			6217.01	8729.56
	15399.5	1082.43		7659.77	1391.3			7301.29	6594.78
	14483.7	851.862		7673.66	782.397			10531.1	8281.95
	12646.6	1615.38		7678.23	2036.01			6531.81	7372.47
	14072	651.931		7681.92	629.722			6008.33	7514.85
	14170.6	1106.85		7702.61	889.015			6599.2	7277.2
	14814.9	2942.15		7705.6	960.258			5954.4	5263.56
	15640.9	935.333		7710.77	1079.45			8107.27	6413.25
	17333.8	1315.77		7713.17	2886.93			8027.87	9333.87
	17469.7	1046.29		7718.86	1436.68			7424.23	6818.16
	15090.3	1088.83		7719	3896.78			14009.8	9255
	11119	1327.11		7727.49	1209.12			7394.76	3025.1
	2436.9	1281.41		7738.48	884.372			7136.42	9534.92
	1588.54	643.138		7753.18	1045.59			7370.9	1624.96
	3650.68	1516.69		7756.05	1338.53			6937.39	3380.47
	15632.5	1049.77		7760.08	1302.11			6336.52	1057.57
	1080.2	932.217		7763.17	4337.59			7566.56	5163.31
	741.448	719.077		7771.08	913			9499.62	7182.4
	2176.6	1698.27		7781.94	1509.94			7559.93	3201.97
	15379.8	1151.11		7809.78	560.658			7776.91	4143.62
	13390.8	843.357		7812.5	1312.26			6237.18	6794.85
	10693.5	2412.48		7821.13	3482.37			6547.29	6755.53
	9373.54	3990.54		7841.3	515.438			6453.97	6716.4
	5974.12	795.31		7846.67	1341.75			6166.46	6460.94
	7710.73	721.267		7851.26	786.71			6585.39	6584.73
	9629.38	1066.76		7862.99	3571.95			9558.57	5031.72
	3382.46	602.2		7870.59	2152.2			5953.93	3092.19
	13797.1	909.862		7877.91	3468.03			7490.57	860.117
	12649.8	631.133		7882.05	3666.04			8006.78	1196.28
	9268.64	2065.57		7882.07	1546.33			9951.23	5649.49
	23225.8	1296		7885.45	1091.35			10959.4	2172.99
	10932.8	895.5		7901.08	1373.99			6826.17	2782.85
	9982.22	2710.13		7908.94	2052.41			7534.37	9375.67
	13214.4	1845.14		7922.33	3685.78			10015.7	6541.45
	12645.2	2232.11		7923.71	994.349			7122.86	7563.94
	6336.48	829.034		7929.04	1370.64			1880.92	8170.56
	13606.1	828.607		7929.77	9216.2			7046.25	8786.65
	15775.5	781.379		7936	1843.18			6847.65	7736.07
	16524.8	1234.17		7936.22	1872.8			5855.34	8572.52
	15885.3	2770.96		7942.37	595.41			938.247	7702.16
	16233.9	1738.28		7948.47	920.361			6800.47	17146.8
	15411.5	2793.83		7950.61	1076.8			6307.35	6405.75
	15854.9	3835.39		7954.02	5462.85			7110.32	7345.37
	16215.3	2414.1		7963.5	1250.61			1049.13	11292.9
	17343.4	2506.71		7975.29	2532.18			4189.55	6888.62
	9210.97	3288.28		7980.3	2000.63			1579.94	5094.37
	1071.1	767.571		7985.15	854.097			1614.7	6358.32
	16832	2359.29		7993.44	1482.24			2102.39	7399.79
	14914.3	524.786		7997.73	957.751			2901.89	3660.41
	15840.1	3858.93		8012.33	1146.19			1413.95	7999.8
	18027.6	1123.38		8014.3	776.158			2929.81	8952.93
	13697.8	3666.87		8021.28	1344.2			1057.74	7528.06
	15476.8	3267.43		8022.42	2135.83			1348.79	4299.88
	14746.8	6091.55		8039.04	804.933			1504.56	6511.46
	12852.6	1145.69		8050.07	2135.76			1425.8	6863.23
	12884.1	6278.46		8061.33	1163.08			975.377	13668.8
	12898.8	3392.57		8086.73	2209.29			1880.1	8167.45
	5312.54	8207.57		8089.18	1577.94			1918.57	10154.9
	17074	2411.68		8092.78	1885.95			2760.61	8934.23
	12824.3	8756.69		8093.85	1116.58			1829.45	11477
	13269.6	1191.15		8094.01	765.358			1548.81	9402.09
	5064.5	3722.62		8098.02	3233.7			1824.95	8672.52
	17396.8	1618.58		8098.3	1906.89			1731.71	8001.4
	19716.2	6631.55		8101.37	876.099			1733.35	7436.7
	12546.7	1864.07		8107.1	1121.76			1351.95	6515.12
	14350	4615.21		8132.25	4105.37			866.863	8846.44
	16002	4778.11		8141.25	4419.63			1102.86	8671.32
	13516.1	4318.44		8142.66	839.753			1913.66	7035.72
	14959.6	2173.48		8142.97	4932.38			1255.49	12536.8
	12677.4	4859.36		8145.79	890.09			1723.94	7871.81
	14125.1	1092.89		8150.36	1388.86			2587.79	8811.49
	8969.44	2648.54		8159.23	3124.24			1429.1	8979.12
	15900.2	1602		8167.42	4354.23			2681.39	6127.05
	15948.2	693.345		8171.07	2178.75			1456.15	8024.22
	15439.9	1463.43		8176.98	945.473			1625.84	8234.9
	14419.4	604.103		8179.95	783.469			2362.24	13433.3
	15609.3	1670		8187.9	2201.64			1794.92	6689.34
	15369.9	1505.9		8192.5	2533.72			1415.04	4848.62
	22424.3	1099.69		8203.5	965.286			2250.48	7821.92
	16213.4	2689.34		8206.8	2669.12			1727.11	6847.4
	1714.65	1602.67		8249	1486.03			2267.06	6844.75
	13880.6	3063.59		8249.71	4220			1421.6	6144.29
	11468.8	886.483		8274.56	1839.4			1496.17	8917.4
	14970.9	618.792		8275.37	1352.6			1745.73	4906.86
	13254	1047.89		8278.59	1031.38			3755.88	6629.65
	14476.4	15762.6		8299.31	533.242			1727.45	6303.68
	20300.4	2545.61		8308.26	1512.55			1513.61	3535.59
	18101	5314.31		8317.75	614.812			1254.6	7565.6
	10355.3	2564.34		8327.59	697.702			8201.49	6921.53
	23163.8	6097.1		8335.19	677.909			5935.71	4511.64
	17561.8	9135.97		8348.25	648.853			5903.81	5022.7
	15787	2563.73		8349.93	600.447			6950.53	7981.7
	17172	1021.03		8352.83	791.201			4602.24	6233.73
	16177.4	2056.74		8353.69	4800.89			1253.95	3663.17
	18543.2	654.241		8362.09	1659.81			1505.31	3301.86
	16008.3	2246.69		8366.81	1066.83			8777.95	10267.2
	13635.8	1167.93		8367.53	2753.38			5454.28	5658.27
	18618.1	6626.2		8368.36	640.596			5431.13	7928.4
	24214.8	690.724		8370.45	953.87			8198.31	7135.71
	6701.7	765.931		8395.34	14465.1			8351.13	8126.74
	12288.7	645		8398.43	1377.64			10960.8	7032.9
	13496.9	725.69		8403.38	2423.78			5032.54	10283.4
	17702.5	962.643		8404.76	1097.63			5497.23	25814.5
	13259.7	1950.86		8414.85	855.768			5395.98	5766.73
	13644.6	1741.95		8422.74	2143.16			6769.2	4998.7
	15388.7	798.37		8429.9	2545.6			10787.6	2228.68
	14185.7	809.069		8437.21	929.353			6483.98	6922.34
	16246.4	948.407		8438.9	2152.44			9385.48	2835.79
	11411	531.556		8449.5	875.194			7495.16	9102.03
	9091.07	7106.87		8475.29	1102.07			7269.51	7682.2
	9975.2	1236.04		8480.28	1216.11			6748.66	7483.42
	7487.72	982.828		8481.96	636.665			7221.05	9086.73
	8649.1	1143.48		8496.05	513.736			7482.92	3064.93
	9226.54	806.577		8498.04	651.557			7039.78	1107.52
	9641.33	855		8503.85	1208.27			7103.68	1587.21
	10932.6	2175.18		8513.97	929.406			7844.52	1664.8
	15829.2	4558.32		8514.29	2383.28			9250.55	2498.19
	11731	11993.5		8524.55	1471.52			10455.5	3802.72
	10836.3	1864.31		8525.94	5324.59			6008.82	2083.46
	13496.4	1271.24		8528.45	1567.29			14137.6	4125.11
	15499.8	2807.41		8532.44	879.116			6426.89	4233
	27067.1	1102.48		8541.66	2547.84			5488.81	4558.99
	17815.1	1524.12		8563.92	2163.94			7660.22	2682.05
	15991.5	642.931		8574.66	556.427			8190.6	4687.08
	14126.7	2716.75		8583.51	3083.26			7598.07	2056.17
	14418.6	4038.5		8586.35	1177.18			8330.6	5551.9
	17891.8	1265.27		8588.8	1021.08			10287.4	2147.95
	18911.9	6156.7		8589.84	4625.62			7483.29	3840.25
	18921.8	5557.88		8594.61	2694.69			6549.35	6682.56
	17175	586.333		8603.78	935.358			6668.23	4746.53
	15229.7	5581.48		8603.91	795.273			6497.18	4436.02
	12968.1	551		8606.8	3558.9			6173.93	4626.23
	15843.5	1104.13		8609.22	1088.2			6862.08	2368.57
	13890.1	560.345		8615.83	3297.65			5558.18	4873.69
	12332.7	1433.77		8619.45	1408.68			6105.17	8862.17
	10100.9	1188.89		8620.78	917.339			7809	4879.42
	12693.9	1278.48		8629.31	1065.84			6551.37	4156.75
	14355.6	936.115		8629.47	821.282			5906.71	3655.88
	11057.2	530.538		8631.89	10697.7			5569.98	3940.95
	13976.1	2901.78		8637.97	3651.43			5549.41	3683.37
	14691	880.552		8638.91	2091.29			6414.63	2412.88
	12699.4	5240.93		8653.82	1723.56			6816.96	4228.92
	12857.6	1387.72		8657.95	1785.22			4174.23	1964.05
	11563.8	2131.38		8666.37	1420.85			4870.84	4421.71
	11690.8	531.759		8673.14	1774.4			5567.16	3710.83
	12021.8	1183.76		8674.9	1056.79			2898.61	4396.79
	12065.7	1103.24		8679.3	2613.83			4534.62	4263.19
	12036.2	873.552		8683.2	2636.24			1333.73	4179.79
	18084.1	1404.4		8706.45	1229.2			1081.97	4880.58
	11196.7	1356.74		8710.48	1726.88			7682.74	4119.61
	17103.7	728.241		8717.5	2627.61			1358.11	9401.03
	12882.8	1376.36		8728.98	552.952			3125.25	4102.97
	14169.3	755.536		8733.09	1914.76			8346.63	5564.26
	13162.1	2148.04		8739.78	2632.04			1500.69	3315.5
	12699.8	3559.54		8752.8	1327.94			1638.46	4202.11
	20123	1405.97		8755.42	3070.59			1805.5	2922.85
	12734.5	1499.21		8758.98	4437.98			2247.78	4094.92
	13428.9	2299.89		8768.93	716.366			1845.77	3698.93
	13515.2	590.967		8769.14	1221.13			2977.43	4639.06
	10360	544.767		8790.53	655.343			1375.01	5390.84
	10024.3	1245.5		8799.22	1505.54			5426.43	4032.48
	7606.68	1244.6		8809.93	733.756			2120.94	4205.24
	5869.83	1513.5		8817.63	1099.12			1884.28	10560.3
	5994.79	1078.21		8821.27	2012.02			11377.3	7628.88
	5769.83	1021.04		8831.05	1393.36			9174.21	4008.17
	8495.5	942.345		8833.53	4562.4			9891.53	4580.39
	11750.4	2691.68		8841.1	732.591			1316.98	8042.17
	3046.9	952.069		8841.42	648.912			2907.01	5603.07
	13710.4	1341.88		8851.11	2111.19			2018.18	4987.32
	2877	3066.52		8852	959.216			8909.36	7416.92
	1191.86	7950.81		8853.56	949.64			1220.63	4288.96
	10655.8	4580.19		8863.68	927.281			7735.97	3124.27
	16549.1	3103.46		8870.07	883.117			2477.76	3665.03
	10882.2	711		8871.24	1085.87			9500.47	3558.27
	8124.94	977.1		8871.28	1271.61			7557.68	4148.36
	8783.24	1866.66		8889.39	1967.51			7463.66	2798.54
	10850.5	1440.26		8891.72	1670.9			2668.2	3035.13
	12417.4	2218.55		8893.77	566.064			2759.75	875.421
	14161	1122.69		8913.46	1119.84			7699.77	5536.3
	16806.6	833.25		8919.11	1503.69			8865.38	2702.62
	11432	2240.55		8919.93	965.865			9201.67	3353.68
	15077.1	1581.25		8929.89	644.838			9272.57	2069.72
	10071.9	1820.5		8930.65	2142.04			6948.81	2569.68
	12434.9	2234.28		8945.4	2564.93			6653.41	2238.96
	12051.4	2005.57		8947.18	1260.29			1301.85	2186.1
	1472.45	2413.25		8949.98	639.101			7136.52	1104.61
	6239.97	1388.19		8962.34	603.583			6129.81	3543.79
	13384.8	1597.03		8968.49	1143.35			8062.54	4641.29
	10641.9	1494.97		8974.52	789.405			6772.05	2140.66
	13616.8	2713.11		8975.23	1624.95			7650.37	3297.9
	10269.7	3121.14		8985.36	2278.64			3547.97	4676.52
	13168.9	3842.07		8986.22	1963.77			6516.64	4831.89
	12098.5	2194.52		8987.4	718.426			3365.08	4652.95
	12176.8	1372.83		8989.76	600.882			6766.81	4874.2
	14016.5	1076.69		8993.59	921.338			10714.8	3853.3
	12284.4	7696.61		9003.53	2210.81			8851.98	8041.01
	9841.93	6143.53		9012.67	1132.71			8937.64	4746.82
	11625.3	2505.86		9025.86	2662.26			8027.84	7111.29
	12428.9	2021.62		9032.77	502.288			8292.47	6622.32
	16999.8	4178.19		9036.31	3566.99			7781.78	9608.44
	12616.4	3707.85		9050.93	1440.34			7915.99	18663.5
	13199.6	1169.36		9071.79	3212.67			5509.48	3800.84
	19176.5	4352.39		9072.9	3659.84			7176.7	3689.82
	13819.2	2888.62		9079.91	1409.84			8823.1	4227.13
	12158.5	3119.21		9091.48	768.921			5793.27	4164.27
	9026.93	1758.77		9105.38	1356.32			5660.01	4903.41
	11768.9	9238		9113.15	3956.92			4113.87	6294.36
	14183.5	8307.21		9119.01	943.805			5104.08	3936.34
	17394.2	2304.75		9119.25	666.549			9352.59	5347.02
	12937.3	6750.5		9128.96	3219.49			5800.7	4885.96
	11904.6	4770.39		9131.69	1293.59			6639.44	5718.86
	11474.5	2592.97		9138.7	971.992			7114.8	3880.64
	12101.5	1886.44		9145.06	2538.58			6741.56	5178.72
	13784.3	4842.43		9150.24	593.038			5936.68	3824.2
	11338.2	5223.82		9152.04	1525.7			5243.72	5564.3
	12900	3930.17		9162.93	1784.28			1184.73	6923.88
	12720.7	2195.5		9170.97	911.414			5878.03	4825.24
	11946.4	2689.63		9185.4	3654.92			6649.85	3665.98
	16407.9	6933.14		9192.61	10323.5			7905.19	3332.88
	12024.3	9094.16		9200.56	1089.94			12085.2	1186.37
	16175.8	6063.74		9209	780.438			4923.14	6257.11
	12220.7	10308.6		9213.44	1328.27			6703.12	4985.14
	12871.2	7453.27		9220.36	1175.72			3480.15	3523.64
	12371	7734.65		9226.89	926.638			1838.84	5833.37
	12045.6	7110.52		9228.88	785.116			4113.32	1206.16
	12260.9	2955.14		9232.1	848.071			6056.45	9428.98
	13575	8476.36		9240.93	1777.81			5043.09	4284.55
	17674.3	1886.41		9260.41	2690.45			1052.67	5227.97
	12293.5	4657.04		9262.77	798.814			8661.51	5212.5
	12514.9	3981.93		9270.73	1340.95			2096.17	4545.2
	12412.3	5196.36		9275.94	691.293			4789.23	3009.89
	13018.1	2175.9		9293.29	1305.58			7275.27	4946.71
	13662.5	1374.62		9313.57	2674.65			1184.16	9234.58
	13614.4	891.708		9332.7	2603.4			7288.33	4148.25
	12583.8	2705.12		9332.88	675.055			6382.71	5765.29
	14123.2	871.4		9334	623.023			6392.47	6234.05
	11315	3474.76		9344.68	876.612			5200.76	9913.77
	6488.97	5696.5		9376.59	1684.15			2433.66	4917.09
	12111.4	2641.93		9388.67	2030.84			2994.46	7758.89
	15597.8	8235.52		9433.25	1832.27			5632.12	3638.56
	13857.1	2516.08		9463.21	3095.73			7717.12	4959.3
	17629.1	9634.07		9480.03	3504.88			6688.56	4900.09
	12858.8	922.704		9490.28	2046.11			5795.44	7565.65
	11256	4955.22		9497.44	1233.07			2092.16	7689.69
	13965.3	2227.56		9509.68	2318.72			4125.89	8201.42
	11293.3	4623.33		9517.34	3439.2			2137.63	4495.98
	11703.8	821.333		9522.93	2666.69			2427.53	5607.6
	12458	4736		9528.96	1897.44			8117.1	8294.16
	11364.6	1439.48		9542.5	2098.84			10216.7	5264.73
	13667.5	7941.3		9564.71	1617.34			7757.5	6573.03
	13158.9	2826.13		9574.97	1508.9			7735.28	3982.09
	12299.2	1105.04		9577.57	3260.77			7347.14	2955.08
	12004.7	4200.83		9582.96	780.407			7763.23	5524.05
	12280.6	1668.3		9605.18	1222.95			8096.35	15613.7
	13771.7	6336.38		9641.15	913.334			8178.97	3940.84
	10699.5	2115.46		9665.16	2898.86			7452.12	7666
	13513	2139.71		9680.92	751.97			5792.98	6744.97
	14846.1	925.034		9681.76	1341.92			7566.9	6786.32
	19070.2	2041.63		9682.15	2602.11			7718.32	7577.4
	11449.3	769.552		9686.42	1651.17			6561.15	3345.64
	12762	2511.24		9698.51	689.762			7644.68	4254.75
	12099.7	2279.68		9703.32	1225.9			6116.47	4354.72
	11564	1010.22		9708.73	630.823			10919.3	1327.08
	11809.1	1537.29		9740.57	2779.6			11301.4	3121.52
	10450.1	1057.37		9770.37	3216.74			9586.53	1312.48
	15390.8	1088.31		9771.05	3265.07			8261.11	3864.78
	15165.7	956.5		9787.84	1008.26			8732.76	1274.52
	12511.3	1220.07		9793.4	873.378			8786.16	2521.03
	14064.4	1584.69		9799.41	963.061			9934.36	4427.87
	10798.7	1182.77		9805.66	619.644			15558.6	3634.79
	13394.2	633.714		9806.44	635.06			9988.28	4753.92
	14268.2	936.31		9814.4	2342.78			8668.72	1462.45
	2765	733.13		9821.74	1384.5			8462.09	6504.82
	18612.2	1620.79		9841.63	1013.72			7818.66	2054.65
	14232.1	831.571		9873.96	1514.06			8028.2	5969.38
	13999.5	1188.27		9883.22	1563.07			7253.94	3306.22
	13773.6	685.419		9885.23	1667.6			8001.68	5370.55
	13443	898.64		9893.45	1912.72			8056.65	4603.24
	12974.4	2373.44		9911.59	1758.64			7139.43	2029.53
	12798.6	1782.43		9914.04	812.939			7819.66	7030.12
	12800.6	1778.17		9919.56	1251.78			7660.48	5394.66
	13121.1	1139.89		9929.73	2670.28			6372.15	5910.69
	15831.8	1221.14		9930.5	501.414			9196.62	5875.26
	13239.8	994.107		9958.11	2369			7630.76	5809.97
	12003	2205.63		9959.44	1903.23			7926.7	6740.53
	1004.63	791.786		9971.05	1212.67			7505.57	6458.22
	9837.14	1638.41		9999.61	794.271			9349.5	5646.62
	974.25	735.742		10036.4	991.967			9574.77	18726.8
	13787.4	1126.62		10041.6	2897.62			7113.85	5077.38
	12159.2	1136.96		10052.9	6105.22			8863.13	7823.92
	816.632	1762.26		10056.7	2065.28			8758.63	6686.73
	3485.45	582.571		10059.4	1233.51			8884.73	7916.16
	12298.9	1549.63		10063.6	1969.78			8402.39	5242.87
	3150.3	1305.37		10074	777.889			9872.95	6086.98
	11880.7	840.241		10074.5	1626.89			8106.18	6002.94
	13893	956.083		10075.4	1958.37			7919.8	2238.54
	14817.6	1835.33		10079.5	2741.52			8943.21	11039
	14994.6	1488.5		10093.7	934.606			8381.22	6075.27
	13481.7	737.429		10097.9	2268.65			8514.29	4393.38
	14618.2	986.087		10098.9	1162.69			8271.38	6889.11
	13466.5	930.933		10132.6	868.905			8792.52	5265.23
	1669.84	1246.93		10137.8	1345.13			7809.55	10622.1
	14237.9	3772.69		10140.6	1305.87			6865.93	10818.8
	12429.4	564.333		10146.8	4417.49			9588.67	5024.2
	11759	1612.15		10160	2237.82			8326.55	5642.12
	18573.5	3124.61		10190.3	2328.09			8629.04	4977.64
	12385.6	1203.07		10194.1	3259.54			8597.17	4706.73
	1254.68	684.586		10196.5	1504.49			6868.37	5149.47
	577.893	1127.42		10197.5	617.495			7659.08	3168.33
	759.448	866.517		10214.3	1729.02			8932.86	8319.88
	12825.6	2126.1		10220.9	866.189			9599.55	8670.96
	9107.1	3146.89		10231.2	1405.06			9220.57	6211.55
	8752.92	758.84		10261	2292.89			8221.37	10062.6
	7116.43	1008.52		10265.7	1190.37			9093.19	7904.93
	7725.2	910.696		10285.1	1429.89			9314.65	9059.54
	7388.46	1629.93		10300.8	1459.05			7766.07	5843.7
	12424.8	921		10324.2	693.345			9497.05	4575.24
	10330.9	1610.24		10331.2	1409.1			8820.38	4543.38
	15689.8	1543.64		10335.2	1975.41			7340.87	6990.49
	11277.7	697.385		10337.3	1729.46			8581.97	10424.7
	10554.2	1699.52		10347.9	683.508			7854.31	6308.39
	12259	871.607		10362.1	792.197			2169.12	6273.14
	10314.4	1189.67		10365.6	1556.63			7909.91	7395.34
	10447	2505.48		10406.2	704.05			7166.04	5864.13
	2281.31	931.267		10442.1	785.394			9170.52	10302.7
	11287.8	863.567		10450	1547.38			6405.64	8847.9
	12271.1	972.63		10484	2169.1			10616.2	6761.18
	10058.2	2604.19		10498.3	916.611			9688.63	5596.05
	16681.5	549.483		10519.4	2275.9			8887.23	4657.76
	11386.4	694.926		10523.6	2097.75			8891.9	3247.76
	14693.4	1071.14		10527.6	4067.49			8740.77	6346.83
	17499	1499.86		10554.9	2734.84			8440.04	4313.77
	14771.6	1403.93		10571.1	2199.42			7660.2	5146.53
	12507.1	1353.07		10577.4	5914.32			8244.52	5291.45
	6272.14	611.821		10620.9	796.128			7829.69	1699.66
	13545.5	549.3		10633.9	2446.01			2991.18	5898.02
	15416.5	2011.87		10636.6	2871.66			1297.99	5421.17
	13387.4	1833.48		10658.5	1114.82			7420.12	4698.1
	6398.55	646.31		10662.1	1580.86			6419.92	3320.14
	11828.1	1210.1		10662.2	1422.87			7689.86	4497.43
	8107.38	2452.83		10665.2	721.523			8052.11	3115.64
	12170.4	1585.41		10668	746.94			2203.5	4791.75
	13217.3	663.292		10685.7	1333.53			6789.07	3800.56
	11319.1	900.032		10688.7	1660.6			2183.37	4717.8
	14511	3064.52		10699.5	811.852			5509.64	1802.53
	13505	820.25		10741.7	1840.57			7430.06	1058.91
	11518.1	1231.89		10743.9	1825.3			9018.29	1961.02
	12021.6	672.621		10775	741.172			3623.37	4802.03
	12040.1	641		10796.9	1063.03			12221.4	4574.23
	11949	996.87		10805.9	1323.96			6222.3	6417.23
	14658.5	1011.76		10817.5	2954.35			6547.35	6147.95
	13199.9	689.19		10834.5	1438.74			7266.89	7878.29
	13859.4	1031.61		10868.3	766.508			6926.3	6071.71
	12741.2	1394.9		10869.8	1264.81			6336.51	3822.35
	11164	1425.27		10921.8	2964.77			18223.9	6351.78
	9863.21	3010.07		10923.7	597.845			9243.75	4282.82
	13196.5	1405.97		10938.1	1686.44			2932.12	3847.49
	11456.8	2359.87		10942	2850.63			7171.12	1189.66
	15408	926.724		10946.8	6207.43			2141.81	1392.58
	15029.8	885.429		10962.8	1212.83			2695.87	1714.95
	17648.2	2128.52		10966.2	1243.35			6019.06	1002.17
	13947.4	2877.38		10966.3	3825.45			7369.41	1830.95
	12854.3	567.783		10968.6	3282.35			6062.8	1137.47
	13022.5	5796		10998.8	4600.5			5909.26	2713.61
	1043.41	3645.92		11012.9	2220.1			7590.89	1583.82
	12360	1578.13		11015.1	1036.75			7360.24	1623.68
	13925	912.964		11041	1946.8			8357.32	896.701
	14514.1	2093.07		11095.9	980.21			6041.28	2609.41
	13445.4	1301.41		11102.4	1546.07			3427.11	2432.04
	11965.7	766.769		11110.7	1102.99			6494.33	1318.99
	15891.5	786.2		11117.9	1754.69			9101.51	3455.41
	17275.7	1174.25		11154.3	3392.61			8726.35	3055.18
	11862.5	1612.43		11160	1859.03			7104.98	2970.47
	12536.8	10412.3		11180.9	2202.35			1066.9	4273.69
	10475.9	7582.78		11213.5	893.827			2022.77	3863.3
	10393.2	1090.93		11225	1704.63			6343.74	3878.39
	13332.4	614		11232.4	2399.53			7927.32	2340.97
	2208.12	901.586		11236.2	3755.4			9605.87	3629.57
	11385.4	730.48		11240.6	657.758			7429.37	4867.14
	18309.9	1036.86		11272	663.254			3404.12	2820.02
	1818.63	4533.78		11274.1	1094.47			6227.34	4499.13
	9265.31	735.036		11294.2	1041.03			7867.04	5050.58
	15414.1	2678.33		11304.9	774.48			7893.44	3258.78
	14486.8	3464.69		11322.2	1103.17			8785.38	5170.38
	3474.08	2482.63		11330.5	1766.41			3146.97	3555.7
	19595.3	2051.93		11361.8	1905.71			6571.77	2724.39
	15581.5	1115.36		11404.2	1493.9			7036.03	3075.42
	16462	1544.53		11430.8	3503.62			3409.56	3311.36
	16187.9	2081.13		11432.8	1015.27			8725.63	1135.72
	17344.8	2068.26		11444.6	2829.1			9618.05	3425.92
	18745.3	939.333		11458.7	699.304			11473.1	2789.44
	15012.2	1568.86		11459	1651.91			7414.8	3627.06
	12049	1183.79		11474.5	815.099			11340.1	3689.86
	14087.6	879.25		11481.9	634.789			9466.88	3844.4
	15647.1	2856.03		11495.6	1199.38			7364.42	5181.88
	9717.59	940.071		11507.5	1018.15			6992.46	3848.46
	7831.14	798.679		11544.3	1367.52			6811.98	3084.16
	4236.92	1884.1		11590.3	3059.31			6387.9	1869.18
	12458.6	908.69		11591.2	770.468			6566.26	5224.77
	12032.4	1728		11592.9	2135.85			8345.23	3967.48
	11010.6	2024.48		11614.3	1027.53			9519.04	6887.01
	10416.5	1150.53		11623.6	1420.98			8178.47	5063.59
	13867.7	1335.77		11655	843.838			2701.31	4850.32
	10292.1	1993.57		11664.4	1078.2			6814.16	3596.75
	15068.6	2136.29		11698.3	1289.61			7988.19	4692.99
	13182.5	947.48		11698.5	1415.91			8454.43	3295.69
	12863.1	2687.24		11707	866.108			7934.73	3800.16
	12893.8	1025.96		11720.6	1789.63			6599.81	4768.12
	10179	1047.29		11723.9	4180.16			1738.55	3795.72
	5253.35	1587.68		11774.4	1205.31			6262.57	2889.55
	9637.9	1978.19		11882	1137.88			7511.98	4506.11
	9099.62	4149.17		11900.4	814.176			7226.17	3069.57
	7535.5	2404.57		11906.3	1358.75			10203.1	4925.83
	11759.3	900		11912.2	2620.54			6533.52	3845.32
	10217.6	2238.14		11918.8	2784.17			6982.68	3923.31
	9591.64	1230.1		11926.8	2717.19			6244.07	5220.03
	12220.5	1389.56		11938.3	1966.51			1957.07	4027.17
	4319.8	1382.26		11957.9	1758.25			2198.61	1724.22
	12532.8	1163.22		11959.9	1380.56			1587.05	3542.74
	12958.8	2367.86		11967.2	1848.2			9576.19	3626.32
	8952.62	9687.13		11972.3	2880.91			5585.78	1166.77
	3744.07	9094.12		12012.2	822.883			6714.27	3019.1
	12134	3843.1		12017.2	1922.17			5871.83	1910.13
	12080.1	7319.72		12025.7	587.503			6808.55	1962.13
	11022.9	6155		12035.2	596.044			3166.24	2360.32
	10237.8	2798.25		12039	896.207			1008.5	1272.97
	6542.27	1207.75		12057.4	1051.67			4473.27	1765.68
	10901.4	3336.52		12067.8	2046.62			5952.59	2563.35
	14151.4	1186.68		12070.6	1342.3			3820.87	3532.69
	8952.04	1861.96		12071.1	1548.93			6117.69	2014.32
	11979.5	2239.13		12081.8	1204.82			3811.76	4247.09
	12396.3	2772.36		12082.9	3168.82			1907.22	5033.73
	10551	4613.88		12102.6	1287.55			5301.88	2614.61
	10775.7	3080.97		12113.6	801.247			2028.87	4922.57
	11354	6109.44		12120.2	877.861			2409.18	1737.98
	10810.1	6320.2		12123.3	811.707			5477.31	7084.16
	11207.5	4380.66		12139.4	3200.18			973.139	7430.99
	10638.1	7856.86		12164	2171.5			5967.09	4006.7
	11589.9	821.714		12178.9	2096.61			6436.01	3596.71
	6926.73	852.138		12200.5	1824.67			4645.87	5159.07
	10392	1756.65		12214.9	1002.84			4041.19	4088.74
	9884.07	858.321		12277.5	871.392			4807.46	9405.47
	12627.6	2996.3		12331.1	751.46			2373.59	3880.97
	12591.1	597.429		12333.3	1475.85			5081	4126.78
	15672	5860.8		12352.1	676.621			1689.51	4502.37
	12721.3	1648.81		12362	2691.67			13353.7	4133.76
	11082.2	652.571		12367.8	1987.6			5784.87	6372.81
	11522.7	1466.33		12372.2	2056.45			6406.85	11676
	11442.8	2093.52		12402.8	1852.87			4401.65	6758.7
	11009	577.034		12412.4	2146.5			1622.89	3405.84
	12889	1861.21		12425.2	1712.81			1131.78	1381.93
	13523.2	1298.17		12427	1029.24			4610.43	6310.62
	10299.9	2427.34		12443.5	13217.9			4919.43	3524.8
	1765.77	1971.57		12452.3	3634.04			4391.15	5127.02
	9861.57	3481.04		12482.3	1657.16			3191.36	5086.12
	8439.07	1898.04		12485.1	5918.97			16111.7	4929.66
	10870.9	3609.76		12554	865.327			5422.25	6071.17
	2883.55	1811.53		12557.1	1428.96			4796.89	4729.91
	1295.07	3973.79		12565.1	1054.22			4895.57	4760.96
	6546.29	5040.13		12587.6	1999.22			4059.49	5118.3
	1515	4999.87		12645	2522.36			4848.15	5286.29
	12870	5546.21		12649.1	1623.09			3770.22	4103.81
	762.581	5788.2		12661.4	2139.5			5746.53	3081.01
	8009.52	1621.41		12717.4	1543.48			5171.37	3340.84
	6047.1	820.556		12722.5	941.797			4839.26	2695.43
	3013.07	618.345		12733.2	1072.55			5236.29	2785.06
	7935	2802		12777.5	3205.29			4703.52	5451.27
	13925.6	8445.65		12806.2	2130.67			7220.27	3156.54
	11858.7	1203.43		12821.6	1165.84			2798.56	3485.07
	10343.4	5776.48		12823.5	1337.74			4683.27	3768.3
	9433.08	3331.15		12828.5	691.31			5353.7	2716.73
	10806.6	2651.03		12853.6	659.059			5359.11	6149.47
	5941.31	676.793		12978.4	970.657			4901.21	2799.17
	9330.41	718.778		12993	1127.63			6634.23	2352.47
	11599.3	1536.28		13012.9	1763.21			5393.6	3568.94
	9183.3	1838.1		13014.4	2605.93			5439.81	2287.56
	11673.5	4590.97		13072	671.895			4990.68	6584.21
	11283.7	945.192		13090	2775.46			5685.78	2613.93
	11537.9	1112.23		13091.8	1194.25			5447.78	2198.2
	11321.1	837.241		13099.9	1110.82			4347.22	2025.27
	13100.9	2499.1		13121.5	1055.12			4842.5	2980.81
	12500.1	3170.69		13162.9	2076.45			4684.63	2735.94
	6607.86	1934.72		13167.3	1400.27			4926.34	1426.28
	11044	2012.52		13177.2	2241.2			4314.12	2230.42
	12132.5	1118.24		13194	2122.28			4381.68	4602.02
	9258.87	1252.39		13197.7	1784.54			4376.4	5003.11
	10924.3	1597		13215.5	2503.52			4760.31	4092.29
	12156.4	939.815		13257.7	2949.91			3649.14	3646.18
	2001.5	1001.92		13298.8	1002.59			4704.41	1711.52
	9451.46	4065.85		13304.2	1151.24			4423.95	2832.21
	10295.2	2791.93		13405.8	3052.22			4426.66	2223.98
	10718.9	1342.6		13435.4	2308.92			3588.82	1504.37
	11221.6	715.483		13438.5	2390.34			3860.73	7599.81
	10930	4947.2		13465.1	2131.44			5016.92	4463.26
	10190.8	1447.16		13483.3	939.146			12010.9	3431.47
	10335.8	1408.28		13483.8	571.427			4677.81	5947.53
	12688.1	698.483		13489.6	1399.71			3765.53	6565.41
	10360.6	2125.16		13579.5	1892.78			1168.41	5896.93
	10080	2706.39		13582.4	1443.41			1132.15	3635.02
	9979.66	729.259		13607.7	1492.36			1021.68	4960.84
	9463.92	4896.17		13649.8	1289.27			1866.54	4389.7
	10340.7	2619		13666.2	1922.93			921.99	4303.96
	10306.4	2393.52		13696.7	1304.87			1014.12	1664.35
	9261.15	1622.32		13726.2	2091.32			3154.83	2885.02
	12313.2	595.31		13814.8	1884.21			766.62	3042.97
	10734.2	1265.77		13845.7	858.766			878.603	4100.28
	10944.4	689.833		13853.6	4160.29			766.383	6103.53
	11812	744.923		13856.6	1237.68			1926.89	4207.27
	15555.4	963.767		13871.5	3003.72			4597.75	3845.09
	6971.1	1838.21		13918.9	1466.06			5029.49	3213.36
	10888.9	750.654		13933.2	1334.54			7508.36	3161.52
	10563.9	1005.54		14023.9	668.618			3387.03	1447.41
	12498.4	1010.52		14035.2	1849.64			4280.06	2484.08
	9727.07	1390.07		14088	5056.02			3434.93	9051.82
	10911.2	3553.7		14132.1	1490.42			4208.39	1853.19
	10125.7	1806.46		14182.1	4094.64			2293.76	2214.07
	10562.9	815.154		14212.5	1312.46			6270.34	4164.85
	10514.1	2807.1		14226.3	1459.36			5627.12	1797.07
	9522.46	1751.89		14371.5	2082.73			5432.48	3090.75
	11232	1060.14		14385.3	1663.16			4825.12	2865.69
	11469.7	1526.17		14465.4	1464.81			4364.23	1818.2
	11564.3	1905.77		14581.7	1355.89			4939	1150.46
	12724.7	1184.46		14588.6	2764.85			5162.39	1114.54
	10895.8	1152.82		14790.6	2571.48			4683.87	1219.14
	12022.7	2528.45		14844.3	1727.81			2975.2	1438.38
	10528.6	2354.83		14993.3	1335.58			5313.75	877.039
	10759.5	1792.62		14999.6	1159.04			6127.26	1383.59
	10524.5	898.4		15079.7	1442.25			4052.89	3132.62
	15714.8	1335.17		15093.3	2107.76			4116.48	1389.54
	11448.2	3341.28		15333.5	4688.11			6637.05	4133.74
	10132.9	2653.04		15545.3	677.366			4249.32	2169.56
	10995	1375.56		15572.4	1082.79			4163.73	2208.84
	11048.7	1195.9		15653.3	1137.98			4033.13	2831.94
	10298.3	1365.72		15805.4	1060.58			2340.58	2263.69
	8733.96	3132.61		16002.4	1230.34			5233.84	2053.3
	14154.3	2288.87		16051.7	1407.52			5391.21	2849.22
	11232	735.321		16064.9	1229.37			5376.66	4033.22
	9175.61	1431.14		16165.1	726.891			4752.91	1341.61
	12000.2	1449.37		16221.5	784.051			5006.55	1515.27
	10821	2096.83		16694.3	1667.56			4522.15	4628.81
	10574	1225		16704.5	1079.1			4883.6	1478.08
	10894.8	702.4		16750.6	1790.05			13094.5	1316.31
	9406.91	940.241		16822.2	3704.66			5092.82	1419.6
	9943.64	1439.86		16980.2	1426.51			3429.22	2803.01
	11533.1	2089.82		17027	11814.7			5617.49	2904.35
	9714.86	1760.67		17143.6	793.08			4383.09	3704.2
	8692.18	1801.29		17153.3	1551.87			4410.53	1341.53
	9678.55	1317.31		17637.2	2969.4			4055.83	1270.49
	9113.32	838.464		18112.1	1381.74			5048.01	2082.69
	11985.1	2908.86		18145.6	1267.74			4536.44	2269.19
	11919	2855.21		18360.1	1442.9			3928.27	2663.7
	13289.4	1596.57		18372.8	2517.08			5683	2093.19
	11473.8	1874.52		19154	1249.94			5035.27	2224.47
	12844.2	1851.24		19409.5	2735.04			8989.42	1627.79
	13367	2438.38		19415.6	2582.73			4972.79	2568.61
	11116.6	1513.36		19665.8	6299.24			5075.18	5422.77
	10526.5	1058.35		19747.4	5452.95			6301.22	2061.84
	10925.2	1709.53		20531.3	1309.77			4050.87	1112.9
	13025.6	7413.54		20925.2	14747.9			8785.06	2181.42
	10146.4	1685.88		21201.7	1705.12			4732.39	1066.24
	10999.6	2398.52		21433.9	6933.57			4889.15	1830.52
	11976.3	2111.93		21623.5	1611.43			8353.83	1206.24
	12372.9	1421.9		21624.3	731.654			5065.79	1378.2
	15179	796.821		21927	1658.01			4088.7	914.005
	7333.79	4598.66		21964.1	8831.05			6080.43	1108.06
	10726.1	1536.21		22952.5	6829.48			4740.39	2370.19
	12332.3	1681.21		24220.1	10301.9			4861.83	1095.62
	11884.2	1150.82		24255.2	4819.07			6659.11	1689.48
	11498.8	3745.03		25723.4	4415.7			3961.15	5839.64
	10376.3	3552.13		26537.9	8826.95			1801.43	2539.8
	11739.2	991.96		27441.3	4142.72			6596.16	1648.18
	9244	976.821		27505.5	7279.2			7171.57	2034.68
	12109.5	2746.18		28001.9	845.221			5494.23	5785.12
	10707.3	10315.8		29474.3	3192.35			4842.91	3068.51
	10890.9	1807.1		31121.5	1304.35			7118.36	1863.51
	10520.8	2516.43		31555.2	5505.23			5746.91	2235.89
	8824.07	2049.11		33390	2062.81			4540.73	3035.66
	12592.2	4610.64		35410.5	1498.93			5534.89	2259.09
	10446.6	2352.31		37201.3	3747.66			4893.09	3232.27
	9392.26	4016.48		41785.1	4344.61			5552.85	2993.02
	11274.8	970.24		44104.7	3901.99			5794.2	3070.78
	10645.7	4413.04		162.601		1427.47		5006.9	4430.8
	9448.11	1308.93		162.875		1617.96		5016.55	916.146
	10712.2	3719.13		163.987		1060.92		5842.53	3926.88
	9272.55	5326.33		165.561		1086.34		7223.65	2588.21
	10303.2	2174.14		165.921		1674.69		6207.72	1437.25
	10098.8	5685.8		166.118		1010.18		5435.31	3283.03
	11011.8	4047.07		168.041		1689.71		4915.66	2366.62
	9194.04	1004.75		168.174		1738.98		4127.12	1672.52
	13738.5	5861.34		168.816		1588.99		4794.67	1188.56
	8132.6	4756.42		168.968		1623.4		4583.54	1014.05
	10799.7	3628.03		168.975		1539.37		4637.35	950.926
	7564.62	3799.17		170.19		1647.38		4576.45	1127.31
	14194.1	1153.14		170.306		1194.48		4442.66	2845.26
	11622.5	864.931		170.675		1846.59		1354.27	1986.19
	15985.6	799.821		171.046		1188.08		2052.26	3152.93
	11803	750.154		171.108		1762.15		6064.7
	13708	1889.26		171.152		1821.99		5709.36
	9518.48	1588.97		171.792		1780.41		7220.37
	11563.1	810.667		172.335		1374.51		5516.83
	13530.6	4204.71		172.37		2206.17		3953.2
	13883.7	1110.32		172.767		1839.66		5786.6
	12180.1	769.483		173.593		2117.2		7209.02
	11404	650.536		174.089		1831.31		4744.03
	11555	2325.17		174.807		2485.65		6526.69
	9890.04	604.871		175.221		1371.81		4022.39
	14438.5	4657.68		175.298		1828.14		5666.02
	11832.1	2306.17		175.782		2183.7		4458.79
	8844.89	1683.44		175.88		2049.22		6361.86
	10195.2	1363.63		175.943		1473.61		4132.99
	9580.2	1825.17		176.084		2017.93		5527.35
	9696.45	1725.43		176.632		2024.33		4641.52
	11412.2	1551.82		176.788		1712.44		4343.32
	9385.79	1842.92		176.795		2104.63		4362.17
	10344.8	919.379		177.119		2110.88		1251.99
	8699.1	1772.83		177.166		1801.29		1280.16
	11849	1471.04		177.474		1585.11		1654.05
	11619.9	971.586		177.665		1040.86		1147.2
	10309.2	1326.46		177.806		1895.77		1238.1
	10692.7	1467.29		178.455		785.003		1123.89
	9771.41	1251.24		178.803		1863.31		846.056
	6098.07	629.28		178.919		1891.82		1128.15
	10402.1	710.167		178.964		1579.4		1279.87
	8349.28	949		178.975		1523.08		1501.76
	10998.3	1263.52		179.028		1745.24		1460.31
	9114.9	868		179.226		2556.79		1966.73
	8625.04	593.5		179.41		1908.01		1454.35
	10010.8	1768.41		179.468		2174.45		1295.41
	8006.97	1111.54		179.472		2201.47		1119.99
	9084.69	3068.97		180.249		1872.91		1435.04
	8762.07	1725.89		180.303		1607.42		969.858
	9645.41	1920.46		180.409		2241.71		1640.29
	9312.08	6297.17		180.621		3094.73		11908.6
	3293.44	1260.57		180.737		462.995		6598.45
	12103.3	1575.55		180.815		1837.73		5535.58
	10217.8	1625.26		180.869		2070.72		3538.65
	10855.3	1235.1		181.247		1233.43		7310.28
	15004.5	1758.97		181.313		2631.76		3489.19
	14008.2	1559.18		181.499		2076.9		5483.23
	11750.6	4311		181.508		1750.73		4487.48
	10244.1	1189.12		181.56		1795.65		3193.32
	10731.6	1480.41		181.893		1826.25		958.411
	10534.9	1286.43		182.073		1923.47		2575.95
	12841.9	1673.36		182.24		2375		6082.89
	10486.4	1710.28		182.246		1368.65		6318.53
	12626.7	945.276		182.305		2466.67		5105.92
	9117	595.609		182.545		1998.75		4448.02
	10014.7	2552.11		182.581		1641.55		7676.04
	10482.5	4219.1		182.628		2108.97		3962.21
	9881.54	3094		182.681		2452.2		3879.26
	7304.03	1381.21		182.793		2569.72		4315.39
	5767.52	3089.55		182.813		2068.89		5482.55
	10582.2	1314.11		182.848		721.053		5062.29
	7539.16	1669.93		182.889		1315.17		5694.92
	9104.68	869.909		183.041		2116.86		6350.33
	11286.1	5424.1		183.11		2297.52		4880.69
	691.864	2965.62		183.129		2034.95		4420.28
	10868.5	694.25		183.155		2426.96		6016.96
	9591.59	1646.9		183.185		1883.28		7416.31
	9426.71	4270.38		183.2		2033.22		7685.35
	5201.03	4845.75		183.244		2161.46		890.856
	569.429	878.429		183.335		1262.62		5694.53
	1428.57	2146.76		183.351		2311.71		4888.45
	9785.73	1715.86		183.362		2110.72		7248.19
	1034.43	1722.55		183.384		2403.23		5262.09
	857.3	1430.42		183.411		1824.31		3823.62
	11930.5	985.345		183.495		2581.86		5216.66
	9501.66	3020.75		183.508		2514.33		6123.15
	1710.17	2019.33		183.527		2904.32		4210.21
	6128.04	1754.38		183.579		2482.92		4657.31
	644.9	2615.9		183.59		1708.5		1317.72
	9841.52	1294.3		183.634		2108.36		1056.73
	11073.6	1576.41		183.637		2224.4		2941.9
	2534.59	1520.32		183.784		1965.26		4740.77
	10047.7	930.897		183.826		2087.73		5545.08
	1893.34	3557.86		184.059		2552.15		5487.38
	12429.9	10034.4		184.083		2694.65		5742.79
	11008.2	4437.9		184.097		1230.59		4543.43
	9578.93	1321.11		184.162		2454.11		7424.5
	11623.1	1740.67		184.176		1887.66		5335.48
	3509.62	3354.54		184.273		2526.28		4654.11
	12858.3	4943.6		184.297		2815.84		4137.55
	10657.4	4940.11		184.316		2684.69		6222.42
	7853.75	3772.34		184.32		1811.26		5551.01
	12376.3	2068.6		184.373		1883.93		5659.2
	1887.69	1196.13		184.377		2584.79		4673.28
	11059.5	3370.2		184.566		2605.41		4219.38
	11930.2	2708.75		184.774		1854.08		6275.49
	9666.85	4272.17		184.816		2629.8		4987.94
	8761.72	853.276		184.868		2283.44		6265.27
	2766.73	1805.27		184.872		2476.39		5718.98
	9055.75	2580.38		184.899		1865.57		6925.22
	7709	4873.73		184.962		1970.9		7217.84
	6242.66	4002.11		184.985		2557.65		4878.43
	5918.38	663.714		185.064		1923.7		9236.47
	4213	1526.71		185.082		2996.67		5057.34
	6608.93	1403.89		185.201		2071.06		5679.53
	6297.07	4131.38		185.28		3107.76		4961.76
	6348.67	817.536		185.291		2687.01		5410.47
	5148.81	1616.17		185.302		2072.11		4973.5
	7878.31	2046.18		185.383		1969.54		5418.98
	7025.65	1358.18		185.468		2211.17		5347.28
	9031.04	953.067		185.476		2054.26		5212.11
	8570.93	1750.81		185.499		2755.01		5114.67
	7104.17	788.964		185.667		2496.06		4811.66
	10260.1	1391.1		185.732		2489.69		5904.92
	11936.8	1931.21		185.792		2543.32		4579.43
	11262.5	2017.93		185.803		1909.4		2740.1
	9277.84	1182.11		185.827		2435.85		8512.77
	16104.2	1972.34		185.833		806.475		5364.44
	9120.14	614.321		185.974		2130.52		9060.05
	8253.36	2051.38		186.005		1949.97		3497.33
	10044.3	2176.65		186.008		1956.99		5578.3
	9394.21	1510.22		186.117		1897.98		4791.62
	1801.45	1198.78		186.337		3343.72		6788.18
	7019	3646.15		186.59		2291.21		8577.16
	9497.68	2484.23		186.594		2860.98		2756.98
	10257.8	2124.47		186.629		3404.2		3835.6
	11966.3	2511.74		186.633		2111.21		2870.89
	10055.6	2181.04		186.728		2820.09		3763.84
	11440.4	1062		186.783		1901.77		3123.66
	8736.04	1148.82		186.943		2139.35		6096.36
	9216.63	677.333		187.043		4240.59		3264.36
	7967.07	3274.28		187.064		2607.27		1092.71
	16012.3	2496.62		187.077		1149.44		4958.02
	9569.48	1781.12		187.079		2423.89		4247.71
	12077.2	1549.75		187.08		2788.95		5699.54
	9640.43	1212.04		187.154		2999.14		5588.43
	10051	2875.41		187.173		2949.85		4478.32
	9749.31	3951.64		187.201		3321.26		6405.74
	7948.29	3742.72		187.333		2823.52		5123.73
	8925.67	795.133		187.381		2609.36		6474.54
	9018.73	2283.33		187.478		2708.01		7041
	10209.8	867.069		187.485		2596.92		1788.12
	10074.2	1188.08		187.587		2758.15		945.271
	10635.9	867.808		187.636		2275.27		6483.19
	9218.93	1075.03		187.636		2644.51		7114.33
	7948.83	1076.93		187.643		1810.42		1125.24
	10257.3	693		187.695		2111.89		1132.04
	11385.2	3552.38		187.772		1425.91		5929.32
	7562.18	1629.07		187.799		1528.12		6133.76
	8960.1	2416.14		187.836		2972.57		5548.88
	10042.3	731.429		187.88		2737.22		6030.04
	10899.3	1788.2		187.894		3335.69		6158.06
	8738.59	1673.5		188.218		2831.13		6695.09
	13235	3628.37		188.246		4461.68		8638.82
	10111.4	3531.92		188.247		2793.64		1045.6
	11456.6	2849.21		188.293		2541.71		5483.1
	10773	1686.03		188.314		1754.27		6662.21
	10555.8	3476.24		188.379		2425.38		5813.92
	10899.3	4187.21		188.439		2426.21		4810.15
	11255.6	4544.25		188.489		3097.17		6808.72
	13207.7	1421.71		188.518		2403.87		4989.05
	1505.61	716.379		188.63		1944.12		4747.93
	10204.8	1015.83		188.689		2809.92		6886.48
	12561.9	2833.34		188.782		2644.04		6048.19
	9716.21	1605.15		188.803		3427.41		11720.1
	11021.3	1013.73		188.81		2935.24		6580.98
	8198.79	2209.7		188.815		2236.87		5765
	9720.53	1332.64		188.868		3111.06		5326.55
	8573.04	3056.72		188.877		2676.51		8218.81
	8173.64	668.5		188.885		2363.2		5653.36
	6897.52			189.068		2794.95		5725.14
	11676.4			189.079		2171.02		5123.74
	5739.48			189.131		2416.41		4615.34
	12847.6			189.14		2510.9		4704.93
	9631.74			189.149		1949.64		5876.48
	7924.21			189.189		3301.45		5249.48
	10738.1			189.199		1458.63		8872.45
	4634.77			189.223		2658.73		5911.14
	10641.5			189.316		2569.36		5624.37
	11488.4			189.394		3131.45		4877.93
	12900.9			189.397		2113.32		5874.95
	13447.9			189.399		3054.37		3671.71
	13515.2			189.429		3015.1		5095.32
	10937.3			189.474		1751.97		4829.94
	13552.3			189.487		2589.61		5039.61
	11711.8			189.505		3087.9		5372.21
	8049.14			189.515		2517.36		6029.39
	10995.8			189.597		2610.99		5277.32
	12611.6			189.612		2528.63		5395.25
	11906.8			189.62		2963.68		6078.81
	7780.88			189.786		2067.78		5971.88
	12659.7			189.789		2180.13		7095.1
	1708.24			189.807		3115.95		5970.8
	12106			189.943		2420.51		8550.97
	10613.6			190.013		7027.97		7369.93
	9244.03			190.041		3106.51		5601.33
	10139.7			190.067		3408.74		6074.62
	9969.73			190.09		2457.35		5450.07
	12118.6			190.118		3737.27		5562.74
	10862.8			190.134		2918.49		4943.31
	12654.2			190.142		2436.29		4984.89
	13014.4			190.207		2423.06		6725.83
	12374.2			190.21		2709.4		6085.08
	9973.07			190.259		3330.42		4546.09
	7335.03			190.279		3404.29		4516.38
	8389.59			190.281		2006.1		8888.11
	6865.89			190.316		5508.98		5488.54
	5459.63			190.321		2031.54		4192.13
	3345.69			190.353		4142.8		10263.1
	1900.11			190.364		1745.28		8249.34
	10709			190.411		2579.44		5980.44
	3527.58			190.452		2802.3		6338.61
	4901.64			190.462		2985.02		6365.5
	6939.59			190.506		2582.97		9270.85
	5779.46			190.628		2766.77		5345.39
	6372.2			190.657		2560.99		4852.89
	8925.29			190.664		2431.85		4993.77
	4261			190.682		2792.71		5211.99
	9366.13			190.792		2706.92		5150.33
	9089.86			190.809		3157.89		6985.82
	11023.2			190.838		2638.36		4974.89
	8896.21			190.903		4258.11		5036.16
	8407.31			190.929		3247.45		4244.7
	10851.3			190.997		2822.02		4889.32
	7361.32			191.078		2069		5461.91
	9131.55			191.126		2601.31		4758.53
	11161.7			191.134		2227.59		6031.41
	8352.87			191.185		4412.85		7249.87
	6290.62			191.22		3248.92		6816.8
	5398.34			191.304		3393.07		7510.78
	9022.54			191.316		2666.36		5799.54
	11236.1			191.359		3145.51		6469.02
	9730.15			191.367		2706.34		5520.99
	9030.08			191.424		2357.96		6081.72
	8737.41			191.457		1871.39		5787.18
	10230.6			191.485		3001.74		4789.45
	8710.5			191.549		2251.79		6161.86
	9046.93			191.559		2060.29		5194.64
	9588.89			191.611		2290.79		7459.68
	16676.1			191.635		2206.15		4972.81
	9411.04			191.642		3543.23		6462.28
	6514.85			191.664		2690.26		4315.56
	6522.32			191.753		1776.6		6155.86
	8755.21			191.773		2639.88		3386.21
	8037.67			191.809		2495.14		4715.86
	8782.86			191.855		2545.61		4821.95
	7820.76			191.908		3044.31		4594.38
	13241.6			191.909		2722.37		4739.7
	8553.11			191.954		2124.06		4975.25
	6116.55			191.959		4137.22		4563.46
	6887.43			191.966		2661.07		5690.82
	7838.66			192.005		2718.98		5466.94
	10680.8			192.129		4129.37		4942.36
	7166.56			192.164		2198.41		5812.47
	7647.86			192.178		3241.47		5313.8
	7568.96			192.189		2003.81		5322.14
	6452.86			192.19		4282.2		1932.94
	7015.86			192.217		2170.79		2138.03
	9596.59			192.251		3729.08		4907.65
	10492.5			192.255		4339.06		2617.89
	8539.64			192.306		2821.31		4294.13
	10146			192.316		2315.76		4953.12
	12290.8			192.331		2554.69		2508.31
	8669.55			192.332		1915.14		2837.26
	10671.3			192.362		3704.85		5878.99
	9585.62			192.43		3222.87		3849.16
	9110.72			192.515		3364.93		5056.77
	7416.58			192.542		3143.7		4505.99
	8954.37			192.543		2504.75		1215.52
	6174.33			192.568		2094.2		1437.27
	8237.43			192.594		2298.8		1062.69
	8830.88			192.625		3185		5369.46
	7012			192.778		2980.5		5840.37
	9171.61			192.802		920.992		2100.11
	7447.85			192.829		3394.08		2992.6
	6274.85			192.848		2867.68		3740.1
	7578.79			192.858		1440.3		2151.88
	4571.41			192.86		1659.92		1421.01
	7743.07			192.901		2579.32		7666.38
	4928.87			192.937		3326.09		5398.52
	7466.24			192.947		2891.41		4782.65
	8509.54			192.951		2246.51		1427.52
	10589.7			193.033		3286.11		6898.25
	7745.77			193.059		2103.02		5360.1
	7452.1			193.061		2533.92		4181.47
	6906.93			193.064		2457.54		12490.4
	9321.48			193.073		2072.98		5124.63
	8777.61			193.094		3135.44		5569.44
	8964.52			193.135		2819.63		6607.61
	9933.66			193.139		2609.03		7389.03
	5825.56			193.155		2619.44		7571.07
	3148.9			193.175		4019.99		6260.02
	6497.97			193.179		2417.29		4185.35
	7925.18			193.193		2239.73		4942.78
	2400.79			193.216		2964.68		4569
	8515.23			193.219		2807.54		6095.88
	7329.48			193.223		3039.62		9451.55
	4085.86			193.298		2703.56		6559.91
	8267.61			193.3		3775.27		3311.22
	8112.18			193.325		3117.54		3909.68
	1181.36			193.333		3235.97		5412.6
	632.5			193.362		2376.55		4860.24
	917.893			193.367		3522.77		6225.46
	661.483			193.394		4585.28		4160.74
	3665.35			193.417		3106.86		4552.23
	6166.39			193.429		3049.92		4644.31
	6548.76			193.438		2937.39		3064.76
	4185.63			193.445		3033.37		2887.11
	2144.61			193.448		3298.34		5026.64
	1222.28			193.519		3160.77		5008.16
	743.917			193.569		2441.79		6796.8
	3213.14			193.571		4077.37		5686.4
	5512.16			193.573		3964.28		7022.65
	6969.28			193.594		2597.87		6961.16
	5102.55			193.604		3134.94		5420.98
	6318.79			193.614		3006.12		6129.97
	1543.45			193.672		2875.45		8414.53
	6552.17			193.682		2176.91		7851.54
	5850.03			193.703		2193.31		5862.62
	6402.86			193.738		2568.28		6193.85
	769.667			193.805		3594.26		6278.28
	925.786			193.844		2011.8		4841.83
	7155.96			193.859		3671.72		6976.67
	10353.2			193.875		2766.71		10262.2
	1115.5			193.886		5871.97		9339.84
	1184.9			193.887		3962.92		5630.9
	3880.03			193.905		3063.92		4636.93
	10225.5			193.906		2966.7		5144.87
	1447.29			193.93		1642.96		5159.47
	6566.56			193.94		3898.87		4982.23
	6562.77			193.982		3369.37		5431.24
	7529.68			194.023		3054.41		5029.12
	7488.52			194.031		3214.08		9682.09
	5480.5			194.051		3354.57		7074.52
	6904.18			194.084		3061.61		7490.09
	7263.17			194.093		3393.03		7172.16
	6338.75			194.095		3648.01		6337.75
	7698.7			194.126		2257.15		6039.66
	1456.32			194.131		1935.62		7251.94
	4842.52			194.174		4038.09		9106.52
	6579.38			194.191		1903.55		8647.51
	2230.96			194.273		4361.1		6854.7
	4837.24			194.291		3298.57		9277.83
	6184.75			194.293		4220.04		9020.81
	1441.59			194.3		2264.07		7629.83
	5462.38			194.322		2056.32		6453.61
	5195.72			194.333		2032.01		7554.75
	5266.82			194.358		3931		5146.75
	1929.74			194.396		3207.8		7236.66
	5857.23			194.402		1254.52		8846.27
	4936.93			194.425		3373.84		5330.72
	4360.71			194.511		2607.43		7937.2
	5529.29			194.547		2646.84		5118.89
	4850.57			194.584		2306.86		5420.3
	3043.03			194.588		3555.17		8183.57
	2657.21			194.596		2891.81		6092.06
	11121			194.66		1327.03		7225.66
	8866.4			194.683		3129.15		9399.48
	11476.6			194.731		3638.55		9354.44
	9878.67			194.742		2255.17		6989.09
	10981.1			194.756		3937.33		10024.5
	9229.57			194.758		3445.96		7142.87
	9566.34			194.771		3003.14		6614.65
	8976.62			194.777		3403.65		7088.23
	8854.21			194.787		3321.77		6829.54
	9729.56			194.817		1059.42		8256.03
	3424.57			194.855		2788.53		6913.81
	7654.2			194.894		2269.8		6558.83
	8497.83			194.896		2229.57		5102.86
	2817.54			194.923		2952.15		5876.93
	8205.13			194.923		3459.57		10236.5
	7016.45			194.925		2106.27		6139.94
	7137.31			194.927		3328.01		6187.7
	11550.4			194.929		2113.39		6881.87
	5841.04			194.992		3680.77		6199.94
	6163.03			195.008		2900.23		5608.06
	6870.12			195.02		3362.07		5899.61
	6106.11			195.055		3139.78		4738.52
	7772.85			195.087		2633.13		7084.13
	5901.97			195.148		3677.32		5353.13
	3981.5			195.168		3243.64		5154.39
	7112.27			195.195		3555.75		7363.74
	8528.68			195.202		2174.86		5080.89
	10255.7			195.205		3086.16		8960.27
	6878.93			195.219		2401.36		3800.39
	7124.83			195.261		3314.75		4724.38
	6008.18			195.288		3066.55		4531.7
	8721.68			195.3		2188.77		5573.83
	4516.11			195.314		3670.29		6804.75
	5550.6			195.319		4209.87		6556.57
	6428.29			195.395		2597.86		9125.96
	6570.04			195.41		3342.31		6366.44
	6674.57			195.414		3239.45		4600.04
	5665.68			195.437		3729.4		5984.7
	6428.36			195.448		2742.86		6577.84
	5670.86			195.459		3603.91		5345.39
	8017.76			195.483		3814.09		6348.53
	8605.87			195.494		2924.31		5653.68
	8544.57			195.505		3427.16		5760.18
	6717.1			195.506		2480.15		5985.21
	9658			195.514		2674.53		5675.79
	9736.27			195.524		3239.45		5367.12
	11327			195.529		2959.3		5625.89
	10887.8			195.554		3876.38		5272.49
	10122.1			195.562		2220.96		5915.67
	10334.3			195.577		3395.71		5168.42
	9666.17			195.58		3010.72		5296.09
	8612.24			195.601		4003.63		5636.12
	9797.24			195.604		3112.13		6623.65
	10085			195.647		3360.92		6533.7
	11180.8			195.688		3056.5		6139.79
	13349.5			195.702		2778.45		6643.61
	13273.6			195.731		2771.65		5220.56
	9309.2			195.77		2989.21		3307.49
	9339.31			195.781		5123.07		4557.96
	7764.7			195.832		3719.76		6402.33
	7501.89			195.851		2808.28		8749.15
	10070.9			195.861		4143.4		5665.96
	9576.74			195.927		2805.99		4718.79
	9166.6			195.932		3089.02		5052.45
	6991.48			195.935		3148.64		4477.28
	8391.79			195.939		2429.4		6629.73
	8148.07			196		2679.41		3995.65
	9166.21			196.015		2980		6431.13
	5589.48			196.018		2649.36		5142.33
	8596.78			196.018		3129.49		5897.73
	8565.1			196.033		3313.32		8414.67
	1243.76			196.054		2079.15		6913.36
	11029.4			196.074		3113.98		5683.96
	7663.75			196.104		2419.92		5185.72
	7533.39			196.172		3908.97		5210.32
	8598.59			196.181		3949.45		6288.15
	7808.34			196.196		2838.46		4788.29
	5566.1			196.196		3131.01		6669.59
	7033.68			196.197		3106.57		5424.12
	6495.38			196.262		2463.26		6838.43
	6362.79			196.322		2403.7		4359.83
	8888.68			196.344		2882.71		5425.25
	8510.96			196.347		2497.43		4477.99
	7033.93			196.389		3085.97		8482.35
	8831.23			196.399		3860.95		3910.74
	6460.03			196.421		3474.05		4558.37
	7176.38			196.425		2508.37		5347.26
	7301.48			196.459		3960.6		4511.73
	6556.64			196.471		2854.68		4775
	7710.1			196.481		3182.62		5869.99
	8357.58			196.538		4614.54		4651.94
	6910.82			196.554		3451.99		6495.06
	6078.82			196.564		2516.67		4651.92
	6555.43			196.6		3194.1		5833.35
	7019.07			196.606		2940.27		6738.02
	6153.76			196.676		3319.65		5132.76
	3761.5			196.702		2108.64		5487.4
	5718.17			196.714		3318.82		5284.27
	6717.81			196.765		2996.26		6280.75
	9441.83			196.773		3432.01		5688.06
	9894.92			196.775		5286.1		7815.7
	9596.14			196.825		4336.61		1444.34
	11799.6			196.834		2956.26		5510.47
	9475.06			196.839		2514.95		929.891
[truncated: 5,979 more rows]

## Sheet: Fig4
		Thoracic injected - uninjured					Thoracic injected - rostral to injury
Summary Region ID	Summary Region Name	Animal 140	Animal 145	Animal 117	Animal 144		Animal 148	Animal 149	Animal 152		Avg uninjured	Avg injured
1	Solitary	3570	1103	921	599		388	2081	510		1548.25	993
2	Medullary reticular nucleus		1393	1623	2335		768	889	310		1783.67	655.667
3	Magnocellular Ret. Nuc.	1566	738	0	542		573	1861	53		711.5	829
4	Gigantocellular reticular nucleus	10953	6643	8673	5528		7276	14182	4550		7949.25	8669.33
5	Lateral Reticular	2344	6809	2935	633		2787	6280	978		3180.25	3348.33
6	Dorsal Reticular	71	10	403	60		24	71	22		136	39
7	Raphe nucleus	660	241	16	559		277	809	180		369	422
8	Hypoglossal related	49	28	658	3		89	347	18		184.5	151.333
9	Trigeminal	254	39	526	30		94	318	148		212.25	186.667
10	Vestibular nucleus	318	99	532	220		325	644	115		292.25	361.333
11	Pontine Reticular	3313	1224	2471	1240		2905	6134	375		2062	3138
12	Superior olivary complex	58	75	66	31		88	178	38		57.5	101.333
13	Pontine Trigeminal region	132	4	474	26		26	59	4		159	29.6667
14	Pontine Central Gray adjacent	2191	545	2810	3603		1336	3821	744		2287.25	1967
15	Parabrachial / Pedunculopontine area	427	109	583	285		426	883	111		351	473.333
16	Cerebellospinal nuclei	0	0	108	0		1	23	0		27	8
17	Red nucleus	1057	944	1566	1821		1209	3174	279		1347	1554
18	Midbrain midline nuclei	82	268	894	392		406	696	166		409	422.667
19	Midbrain reticular	674	532	1759	987		967	1404	295		988	888.667
20	Periaqueductal gray	160	270	875	163		421	1179	13		367	537.667
21	Hypothalamic Periventricular Zone	308	349	502	91		308	1192	6		312.5	502
22	Hypothalamic Lateral Zone	1430	952	1172	837		991	2059	175		1097.75	1075
23	Hypothalamic Medial Zone	260	138	233	98		58	433	28		182.25	173
24	Thalamus	32	28	78	17		34	55	0		38.75	29.6667
25	Corticospinal	8813	11459	5863	9829		8381	10834	7710		8991	8975
		38722	34000	35741	29929		30158	59606	16828

## Sheet: Fig5
			Raw Values															Average uninjured		Percent Sparing Values
SummaryRegion ID	Summary Region Name		Animal 185	Animal 190	Animal 191		Animal 177	Animal 179	Animal 183	Animal 187	Animal 188	Animal 189		Animal 180	Animal 182	Animal 184				Animal 185	Animal 190	Animal 191		Animal 177	Animal 179	Animal 183	Animal 187	Animal 188	Animal 189		Animal 180	Animal 182	Animal 184
1	Solitariospinal Area		561	263	1026		70	43	7	13	54	47		1	3	0		862.1		65.0737	30.5069	100		8.11971	4.98782	0.811971	1.50795	6.26377	5.4518		0.115996	0.347987	0
2	Medullary Reticular Nuclei		792	110	1106		67	0	0	418	23	51		0	0	0		1373.6		57.6587	8.00815	80.5183		4.87769	0	0	30.431	1.67443	3.71287		0	0	0
3	Magnocellular Ret. Nuc.		84	103	1116		107	139	18	0	98	121		0	0	0		645.8		13.0071	15.9492	100		16.5686	21.5237	2.78724	0	15.175	18.7365		0	0	0
4	Gigantocellular reticular nucleus		8037	4256	7125		2456	596	672	1784	1405	1444		0	4	2		9233.5		87.0418	46.093	77.1647		26.5988	6.45476	7.27785	19.321	15.2163	15.6387		0	0.0433205	0.0216603
5	Lateral Reticular Nuclei		5731	445	1116		1371	26	60	408	238	1125		0	0	0		1893.2		100	23.5052	58.9478		72.4171	1.37334	3.16924	21.5508	12.5713	59.4232		0	0	0
7	Raphe Nuclei		142	307	379		129	72	3	66	108	225		0	0	0		469.7		30.2321	65.3609	80.6898		27.4643	15.3289	0.638706	14.0515	22.9934	47.9029		0	0	0
10	Vestibular Nuclei		66	53	119		26	18	12	10	12	1		0	0	0		190.2		34.7003	27.8654	62.5657		13.6698	9.46372	6.30915	5.25762	6.30915	0.525762		0	0	0
11	Pontine Reticular Nuclei		1964	579	2132		185	87	41	717	994	429		0	0	11		2288.3		85.8279	25.3026	93.1696		8.0846	3.80195	1.79172	31.3333	43.4384	18.7475		0	0	0.480706
14	Pontine Central Gray Area		1269	946	1479		488	141	225	401	529	282		0	0	0		1469.8		86.3383	64.3625	100		33.2018	9.59314	15.3082	27.2826	35.9913	19.1863		0	0	0
15	Parabrachial / Pedunculopontine		89	121	222		61	5	5	18	167	41		0	0	0		272.5		32.6606	44.4037	81.4679		22.3853	1.83486	1.83486	6.6055	61.2844	15.0459		0	0	0
17	Red Nucleus		943	845	1530		430	3	6	1122	1025	33		0	0	13		1426.5		66.1059	59.2359	100		30.1437	0.210305	0.42061	78.654	71.8542	2.31335		0	0	0.911321
19	Midbrain Reticular Nuclei		205	146	413		70	35	20	152	289	87		0	0	0		545.4		37.5871	26.7693	75.7242		12.8346	6.41731	3.66703	27.8695	52.9886	15.9516		0	0	0
21	Hypothalamic Periventricular Zone		535	37	297		409	2	0	394	124	161		0	0	0		435.3		100	8.49989	68.2288		93.9582	0.459453	0	90.5123	28.4861	36.986		0	0	0
22	Hypothalamic Lateral Area		421	87	736		636	4	0	146	377	47		2	0	0		1046.1		40.2447	8.3166	70.3566		60.7972	0.382373	0	13.9566	36.0386	4.49288		0.191186	0	0
25	Corticospinal		153	385	4022		215	310	7	397	5684	18		0	0	0		8283.3		1.84709	4.64791	48.5555		2.59558	3.74247	0.0845074	4.79278	68.62	0.217305		0	0	0

[truncated: 3 more sheets: Fig5-supp2, Fig6, Fig6-supp1]
